# Supplementary material for: Aqueous solution of biogenic carboxylic acids as sustainable catalysts and green reaction media for the high-yielding synthesis of Biginelli adducts, Hantzsch esters, and substituted pyridines
Source: Royal Society of Chemistry journal article supplement (doi:10.1039/d4ra07772e), 2024-01-01
Supplement: d4ra07772e1.pdf [file d4ra07772e1.pdf]

*Supplementary Information*

**Aqueous solution of biogenic carboxylic acids as sustainable catalysts and green reaction media for the high-yielding synthesis of Biginelli adducts, Hantzsch esters, and substituted pyridines**

Poornachandra Shamanna Prabhakar,<sup>†a</sup> Jitendra Sahoo,<sup>†a</sup> Ibrahim A. Alnaser,<sup>b</sup> Asiful H. Sheikh,<sup>b</sup> Mohammad Rezaul Karim,<sup>b</sup> and Saikat Dutta<sup>a\*</sup>

<sup>†</sup> Equal contribution

<sup>a</sup> Department of Chemistry, National Institute of Technology Karnataka (NITK), Surathkal, Mangalore-575025, Karnataka, India.

<sup>b</sup> Center of Excellence for Research in Engineering Materials (CEREM), Deanship of Scientific Research, King Saud University, Riyadh 11421, Saudi Arabia and Saikat Dutta<sup>\*a</sup>

\* Corresponding author. E-mail: [sdutta@nitk.edu.in](mailto:sdutta@nitk.edu.in)

Number of Pages: 53

Number of Figures: 90

## Characterization data of synthesized 3,4-Dihydropyrimidin-2(1H)-ones

Ethyl-6-methyl-2-oxo-4-phenyl-1,2,3,4-tetrahydropyrimidine-5-carboxylate (**4a**):<sup>1-3</sup> Light yellow solid (1.171 g, 96%); Melting Point (°C): 202-204; <sup>1</sup>H-NMR (400 MHz, DMSO-d<sub>6</sub>, δ ppm): 9.19 (s, 1H), 7.73 (s, 1H), 7.27 (m, 5H), 5.14 (s, 1H), 3.98 (q, 2H, *J* = 7.2 Hz), 2.25 (s, 3H), 1.09 (t, 3H, *J* = 7.2 Hz); <sup>13</sup>C-NMR (100 MHz, DMSO-d<sub>6</sub>, δ ppm): 165.8, 152.6, 148.8, 145.3, 128.9, 127.7, 126.7, 99.7, 59.6, 54.4, 18.2, 14.5; FTIR (ATR, cm<sup>-1</sup>): 3244, 3117, 2978, 1727, 1701, 1646.

Ethyl-4-(4-Methoxyphenyl)-6-methyl-2-oxo-1,2,3,4-tetrahydropyrimidine-5-carboxylate (**4b**):<sup>1-3</sup> Light yellow solid (0.940 g, 88%), Melting Point (°C): 202-204; <sup>1</sup>H-NMR (400 MHz, DMSO-d<sub>6</sub>, δ ppm): 9.16 (s, 1H), 7.67 (s, 1H), 7.15 (d, 2H, *J* = 8.4 Hz), 6.88 (d, 2H, *J* = 8.4 Hz), 5.10 (s, 1H), 3.98 (q, 2H, *J* = 7.2 Hz), 3.72 (s, 3H), 2.25 (s, 3H), 1.11 (t, 3H, *J* = 7.2 Hz); <sup>13</sup>C-NMR (100 MHz, DMSO-d<sub>6</sub>, δ ppm): 170.6, 163.7, 157.4, 153.2, 142.3, 132.6, 118.9, 104.8, 64.4, 60.3, 58.6, 23.0, 19.3; FTIR (ATR, cm<sup>-1</sup>): 3239, 3109, 2930, 1702, 1646.

Ethyl-6-methyl-4(4-nitrophenyl)-2oxo-1,2,3,4-tetrahydropyrimidine-5-carboxylate (**4c**):<sup>2,3</sup> Light yellow solid (0.940 g, 92%), Melting Point (°C): 209-211; <sup>1</sup>H-NMR (400 MHz, DMSO-d<sub>6</sub>, δ ppm): 9.35 (s, 1H), 8.21 (d, 2H, *J* = 8.8 Hz), 7.89 (s, 1H), 7.50 (d, 2H, *J* = 8.8 Hz), 5.28 (s, 1H), 3.99 (q, 2H, *J* = 7.2 Hz), 1.09 (t, 3H, *J* = 7.2 Hz); <sup>13</sup>C-NMR (100 MHz, DMSO-d<sub>6</sub>, δ ppm): 170.3, 157.2, 157.0, 154.6, 151.9, 132.9, 129.1, 103.4, 64.6, 58.9, 23.1, 19.3; FTIR (ATR, cm<sup>-1</sup>): 3254, 3109, 2955, 1699, 1643.

Ethyl-4-(4-bromophenyl)-6-methyl-2-oxo-1,2,3,4-tetrahydropyrimidine-5-carboxylate (**4d**):<sup>1,2</sup> Light yellow solid (0.780 g, 85%), Melting Point (°C): 196-198; <sup>1</sup>H-NMR (400 MHz, DMSO-d<sub>6</sub>, δ ppm): 9.30 (s, 1H), 7.82 (s, 1H), 7.43 (d, 2H, *J* = 12.0 Hz), 7.27 (d, 2H, *J* = 12.0 Hz), 5.18 (s, 1H), 4.00 (q, 2H, *J* = 6.8 Hz), 2.27 (s, 3H), 1.09 (t, 3H, *J* = 6.8 Hz); <sup>13</sup>C-NMR (100 MHz, DMSO-d<sub>6</sub>, δ ppm): 165.6, 152.5, 149.4, 148.0, 131.2, 130.6, 129.7, 125.7, 122.0, 99.1, 59.8, 54.1, 18.3, 14.5; FTIR (ATR, cm<sup>-1</sup>): 3235, 3101, 2924, 1699, 1644.

Ethyl-6-methyl-2-oxo-4(p-tolyl)-1,2,3,4-tetrahydropyrimidine-5-carboxylate (**4e**):<sup>2,3</sup> Light yellow solid (1.050 g, 92%), Melting Point (°C): 212-214; <sup>1</sup>H-NMR (400 MHz, DMSO-d<sub>6</sub>, δ ppm): 9.14 (s, 1H), 7.68 (s, 1H), 7.11 (s, 4H), 5.10 (s, 1H), 3.98 (q, 2H, *J* = 6.8 Hz), 2.26 (s, 3H), 2.23 (s, 3H), 1.10 (s, 3H, *J* = 6.8 Hz); <sup>13</sup>C-NMR (100 MHz, DMSO-d<sub>6</sub>, δ ppm): 165.4, 152.2, 148.1, 142.0, 136.3, 128.9, 126.1, 99.4, 59.1, 53.6, 20.6, 17.7, 14.1; FTIR (ATR, cm<sup>-1</sup>): 3243, 3113, 2922, 1704, 1647.

Ethyl-4-(4-fluorophenyl)-6-methyl-2-oxo-1,2,3,4-tetrahydropyrimidine-5-carboxylate (**4f**):<sup>1,2</sup> Light yellow solid (0.952 g, 85%), Melting Point (°C): 175-177; <sup>1</sup>H-NMR (400 MHz, DMSO-d<sub>6</sub>, δ ppm): 9.22 (s, 1H), 7.74 (s, 1H), 7.27 (d, 1H, *J* = 5.6 Hz), 7.25 (d, 1H, *J* = 5.6 Hz), 7.16 (d, 1H, *J* = 8.8 Hz), 7.13 (d, 1H, *J* = 8.8 Hz), 5.15 (s, 1H), 3.98 (q, 2H, *J* = 6.8 Hz), 2.25 (s, 3H), 1.09 (t, 3H, *J* = 6.8 Hz); <sup>13</sup>C-NMR (100 MHz, DMSO-d<sub>6</sub>, δ ppm): 165.2, 162.5, 160.1, 152.0, 148.5, 128.3, 128.2, 115.2, 115.0, 99.1, 59.2, 53.3, 17.8, 14.1; FTIR (ATR, cm<sup>-1</sup>): 3238, 3110, 2927, 1695, 1642.

Ethyl-6-methyl-2-oxo-4(3,4,5-trimethoxyphenyl)-1,2,3,4-tetrahydropyrimidine-5-carboxylate (**4g**):<sup>1</sup> Light yellow solid (0.767 g, 86%), Melting Point (°C): 216-218; <sup>1</sup>H-NMR (400 MHz, DMSO-d<sub>6</sub>, δ ppm): 9.18 (s, 1H), 7.70 (s, 1H), 6.53 (s, 2H), 5.12 (s, 1H), 4.02 (q, 2H, *J* = 7.2 Hz), 3.72 (s, 6H), 3.63 (s, 3H), 2.25 (s, 3H), 1.13 (t, 3H, *J* = 7.2 Hz); <sup>13</sup>C-NMR (100 MHz, DMSO-d<sub>6</sub>, δ ppm): 165.4, 152.7, 152.2, 148.4, 140.5, 136.8, 103.4, 99.0, 60.0, 59.2, 55.8, 53.8, 17.8, 14.2; FTIR (ATR, cm<sup>-1</sup>): 3229, 3096, 2953, 1704, 1651.

Ethyl-4-(4-chlorophenyl)-6-methyl-2-oxo-1,2,3,4-tetrahydropyrimidine-5-carboxylate (**4h**):<sup>1,2</sup> Light yellow solid (0.985 g, 94%), Melting Point (°C): 212-214; <sup>1</sup>H-NMR (400 MHz, DMSO-d<sub>6</sub>, δ ppm): 9.24 (s, 1H), 7.77 (s, 1H), 7.39 (d, 2H, *J* = 8.0 Hz), 7.25 (d, 2H, *J* = 8.0 Hz), 5.15 (s, 1H), 3.98 (q, 2H, *J* = 7.2 Hz), 2.25 (s, 3H), 1.09 (t, 3H, *J* = 7.2 Hz); <sup>13</sup>C-NMR (100 MHz, DMSO-d<sub>6</sub>, δ ppm): 165.2, 151.9, 148.7, 143.8, 131.8, 128.4, 128.2, 98.8, 59.2, 53.4, 17.8, 14.1; FTIR (ATR, cm<sup>-1</sup>): 3339, 2980, 2931, 1724, 1695.

Ethyl-4-(4-ethoxyphenyl)-6-methyl-2-oxo-1,2,3,4-tetrahydropyrimidine-5-carboxylate (**4i**):<sup>2</sup> Light yellow solid (0.930 g, 92%), Melting Point (°C): 187-188; <sup>1</sup>H-NMR (400 MHz, DMSO-d<sub>6</sub>, δ ppm): 9.14 (s, 1H), 7.66 (s, 1H), 7.13 (d, 2H, *J* = 8.8 Hz), 6.85 (d, 2H, *J* = 8.8 Hz), 5.09 (s, 1H), 3.98 (q, 4H, *J* = 6.8 Hz), 2.24 (s, 3H), 1.30 (t, 3H, *J* = 6.8 Hz), 1.10 (t, 3H, *J* = 6.8 Hz); <sup>13</sup>C-NMR (100 MHz, DMSO-d<sub>6</sub>, δ ppm): 165.4, 157.7, 152.1, 148.0, 136.9, 127.4, 114.1, 99.6, 62.9, 59.1, 53.3, 17.7, 14.6, 14.1; FTIR (ATR, cm<sup>-1</sup>): 3237, 3108, 2978, 1702, 1646.

Ethyl-4-([1,1'-biphenyl]-4-yl)-6-methyl-2-oxo-1,2,3,4-tetrahydropyrimidine-5-carboxylate (**4j**):<sup>3</sup> Light yellow solid (0.785 g, 85%), Melting Point (°C): 232-235; <sup>1</sup>H-NMR (400 MHz, DMSO-d<sub>6</sub>, δ ppm): 9.23 (s, 1H), 7.78 (s, 1H), 7.64 (d, 2H, *J* = 7.2 Hz), 7.62 (d, 2H, *J* = 8.2 Hz), 7.46 (d, 1H, *J* = 7.2 Hz), 7.44 (d, 1H, *J* = 7.2 Hz), 7.35 (t, 1H, *J* = 8.2 Hz), 7.33 (d, 2H, *J* = 8.2 Hz), 5.20 (s, 1H), 4.01 (q, 2H, *J* = 6.8 Hz), 2.27 (s, 3H), 1.30 (t, 3H, *J* = 6.8 Hz); <sup>13</sup>C-NMR (100 MHz, DMSO-d<sub>6</sub>, δ ppm): 165.3, 152.2, 148.5, 144.0, 139.7, 139.2, 128.9, 127.4,

126.8, 126.8, 126.6, 99.2, 59.2, 53.6, 17.8, 14.1; FTIR (ATR,  $\text{cm}^{-1}$ ): 3246, 3117, 2954, 1701, 1646.

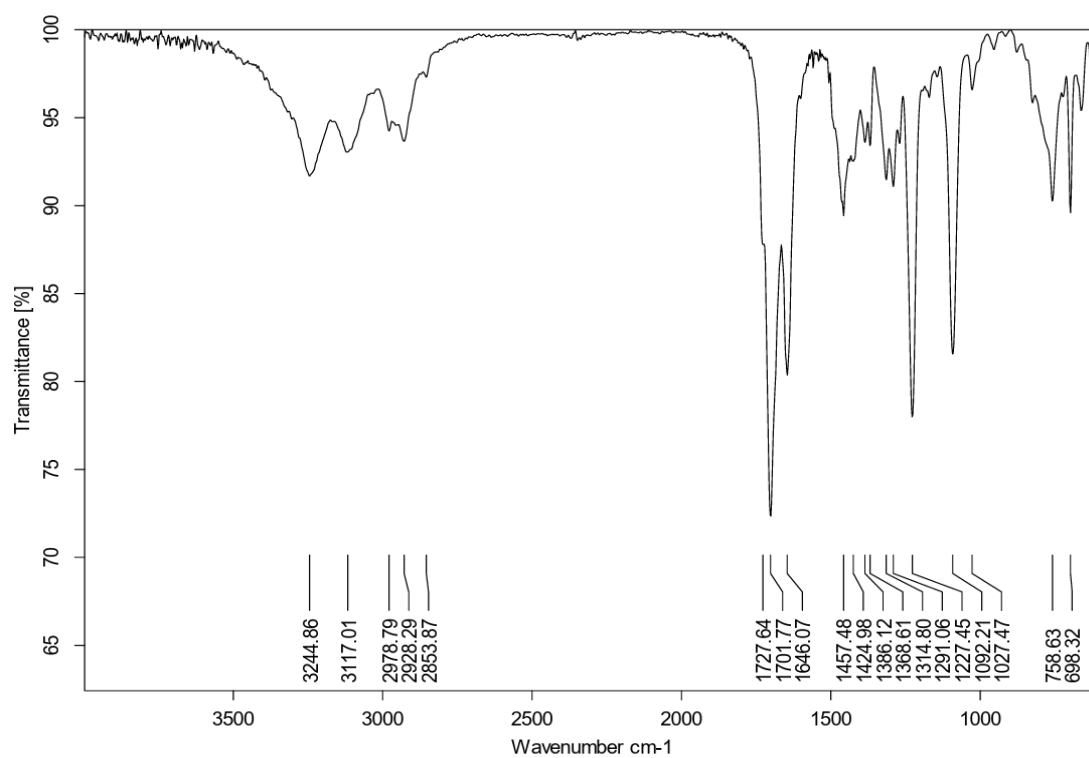

**Figure S1.** The FTIR spectrum of **4a**.

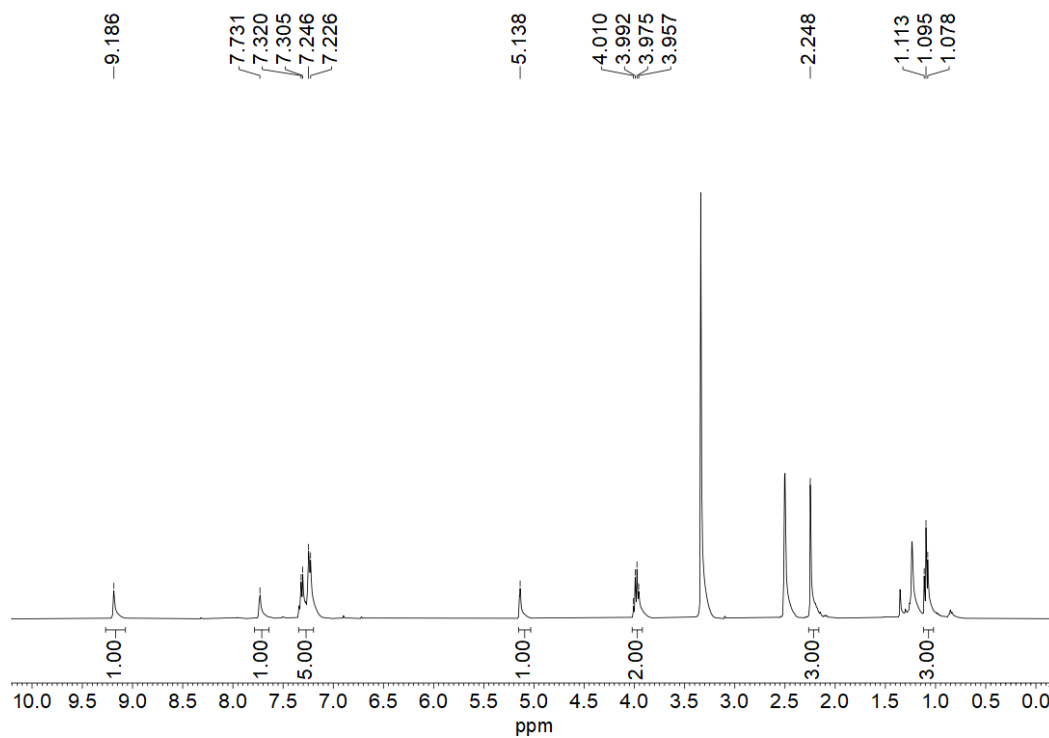

**Figure S2.** The  $^1\text{H-NMR}$  spectrum of **4a**.

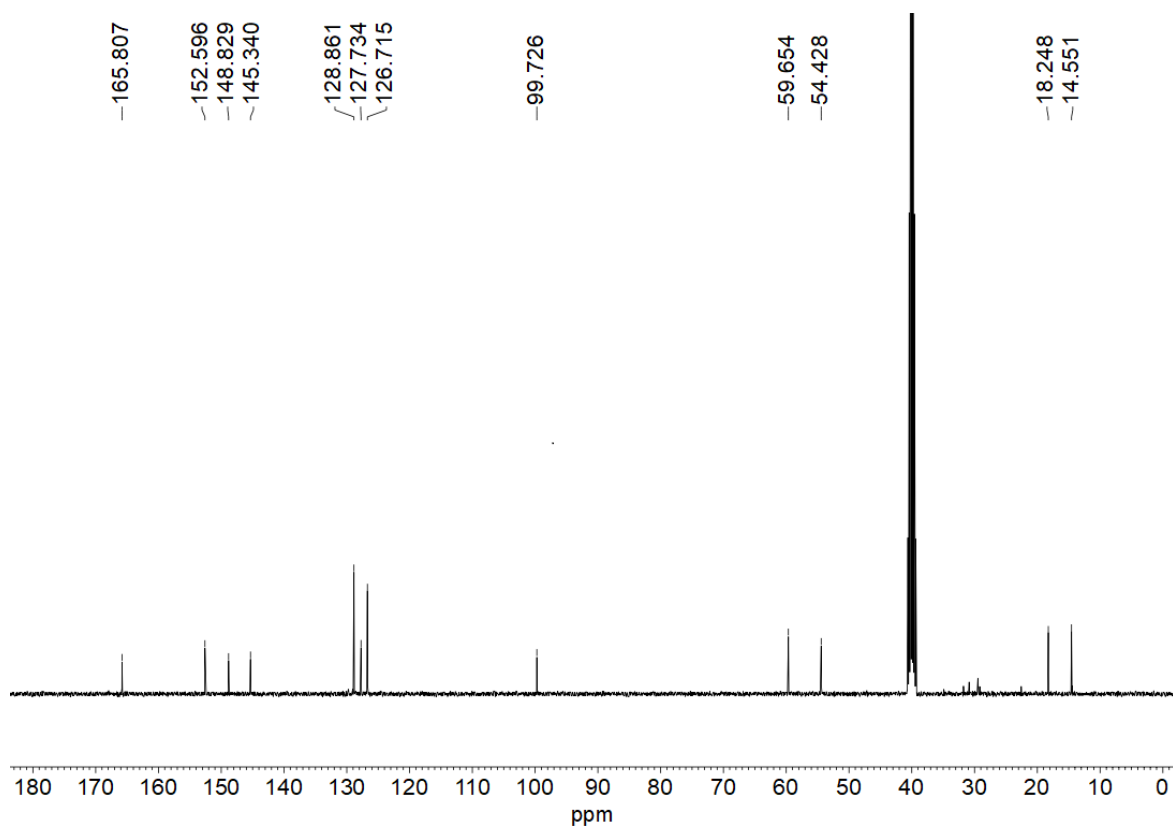

**Figure S3.** The  $^{13}\text{C}$ -NMR spectrum of **4a**.

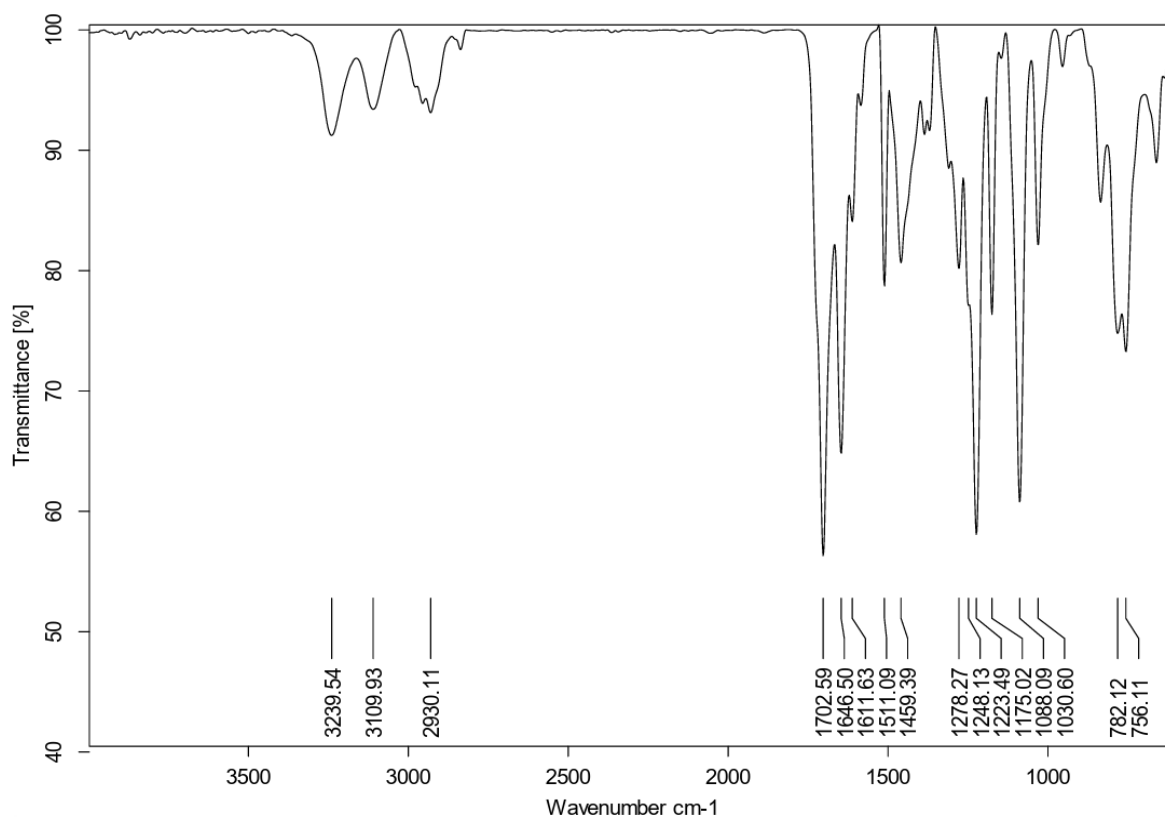

**Figure S4.** The FTIR spectrum of **4b**.

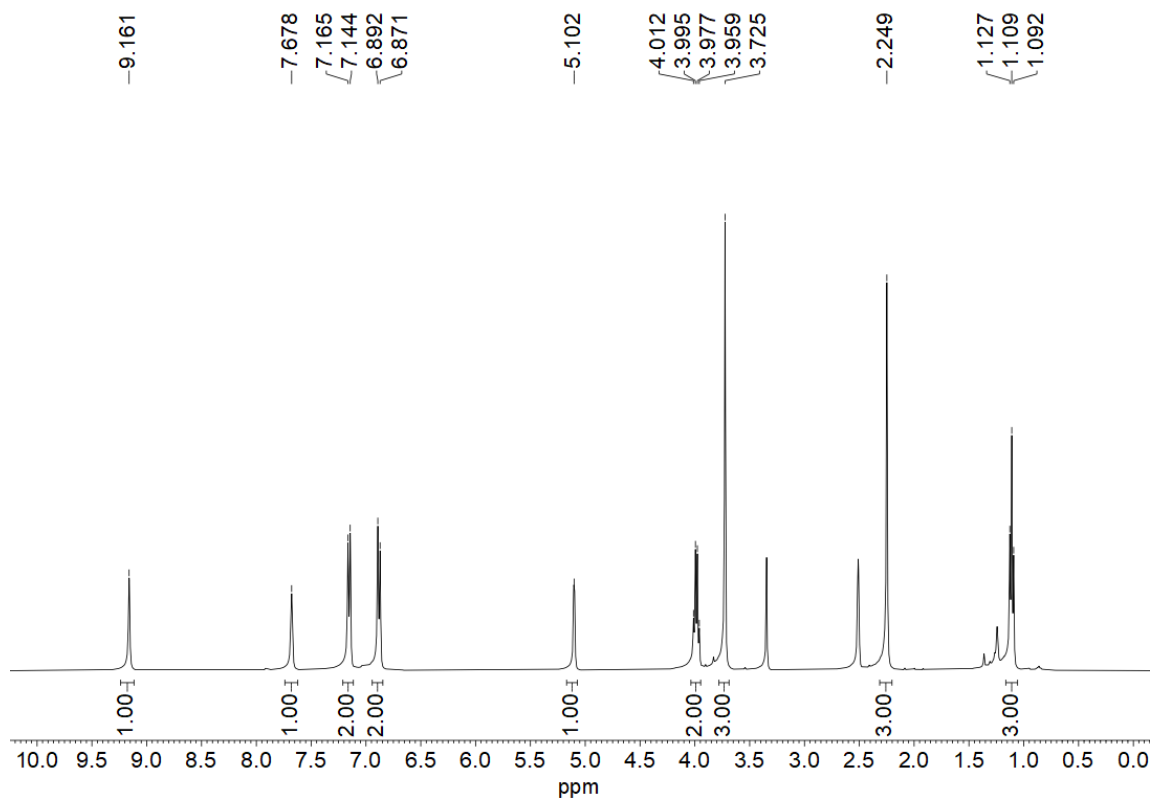

**Figure S5.** The  $^1\text{H}$ -NMR spectrum of **4b**.

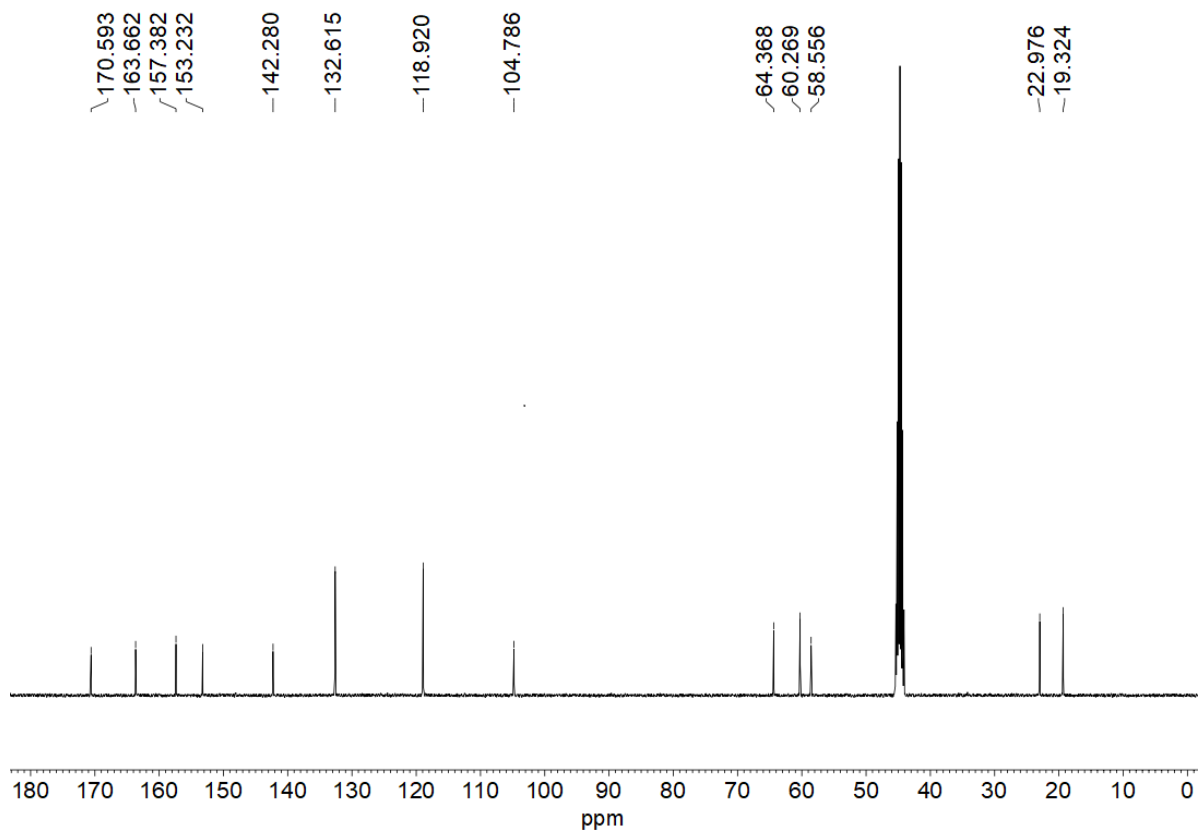

**Figure S6.** The  $^{13}\text{C}$ -NMR spectrum of **4b**.

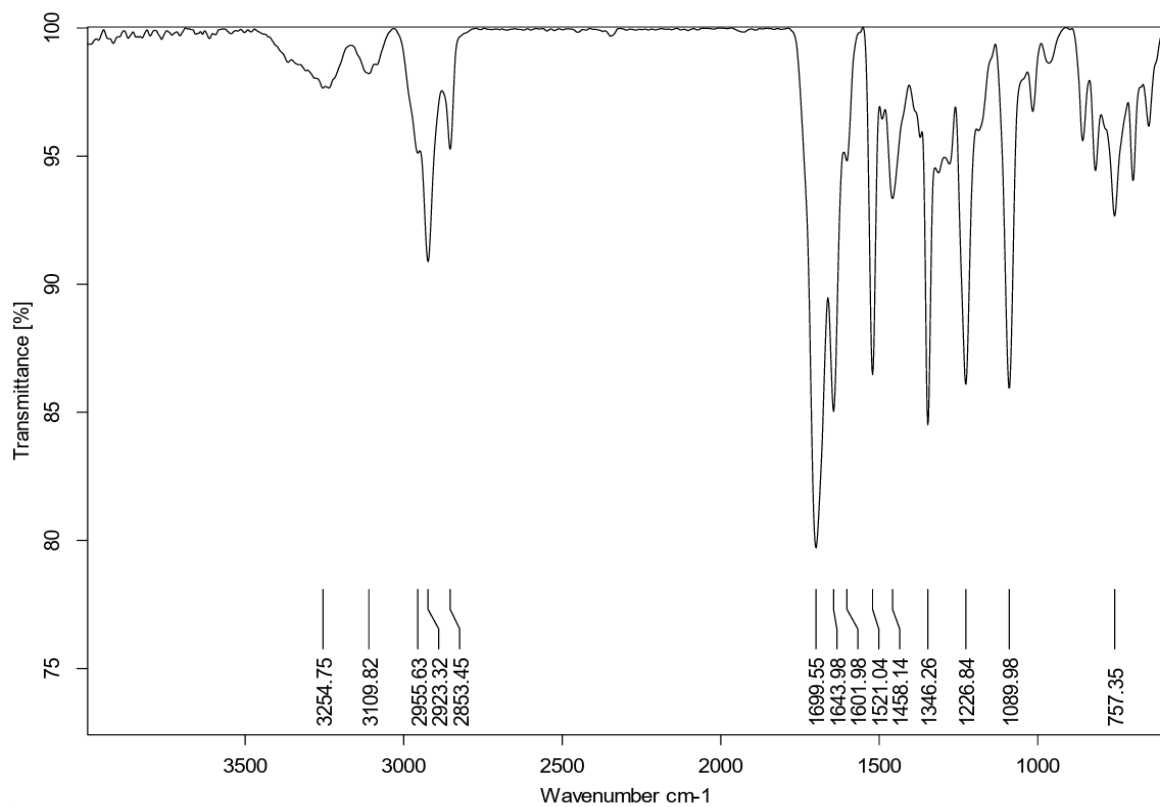

**Figure S7.** The FTIR spectrum of **4c**.

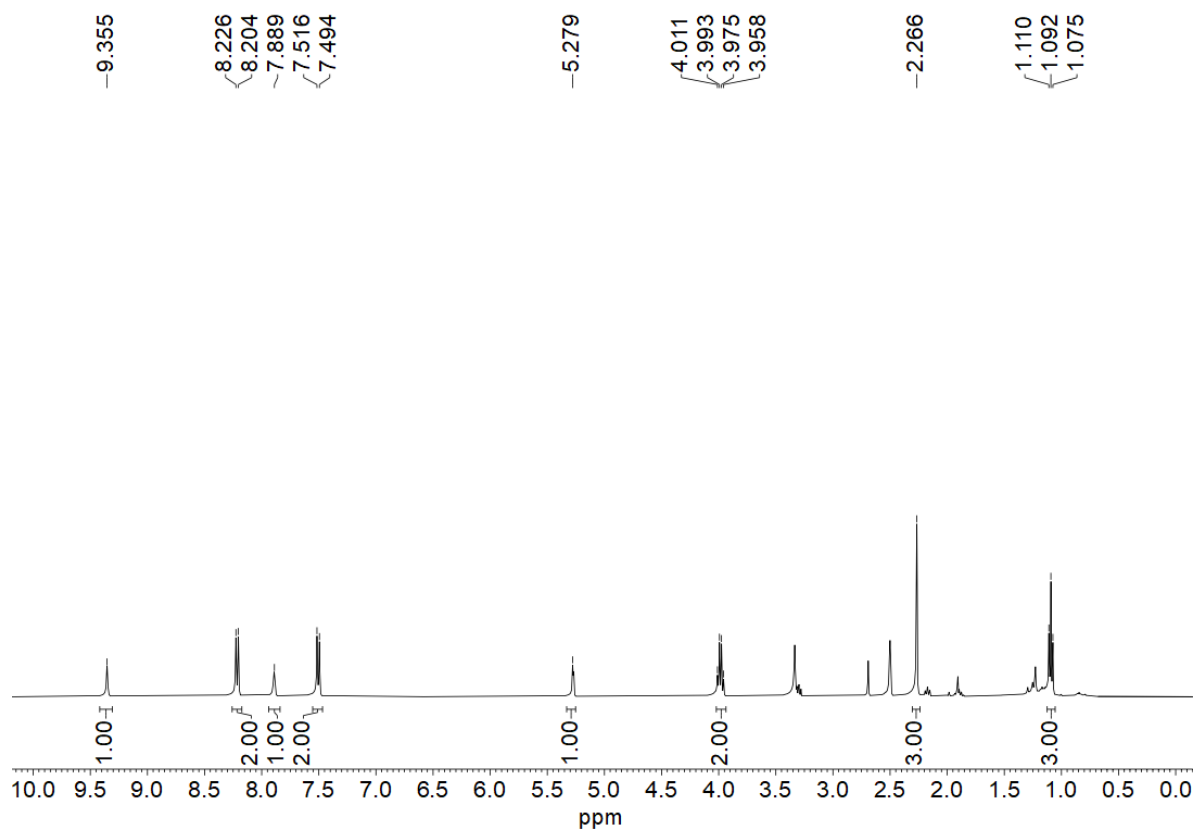

**Figure S8.** The  $^1\text{H-NMR}$  spectrum of **4c**.

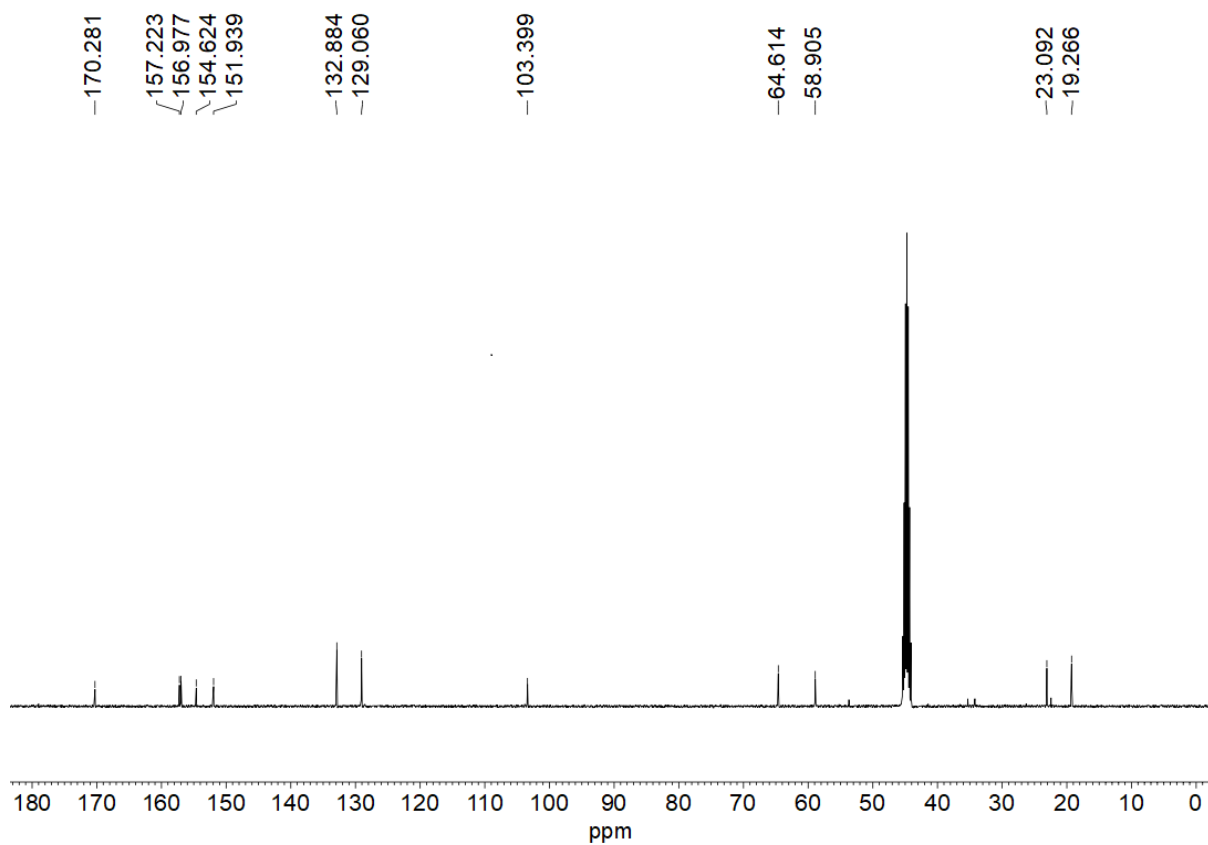

**Figure S9.** The  $^{13}\text{C}$ -NMR spectrum of **4c**.

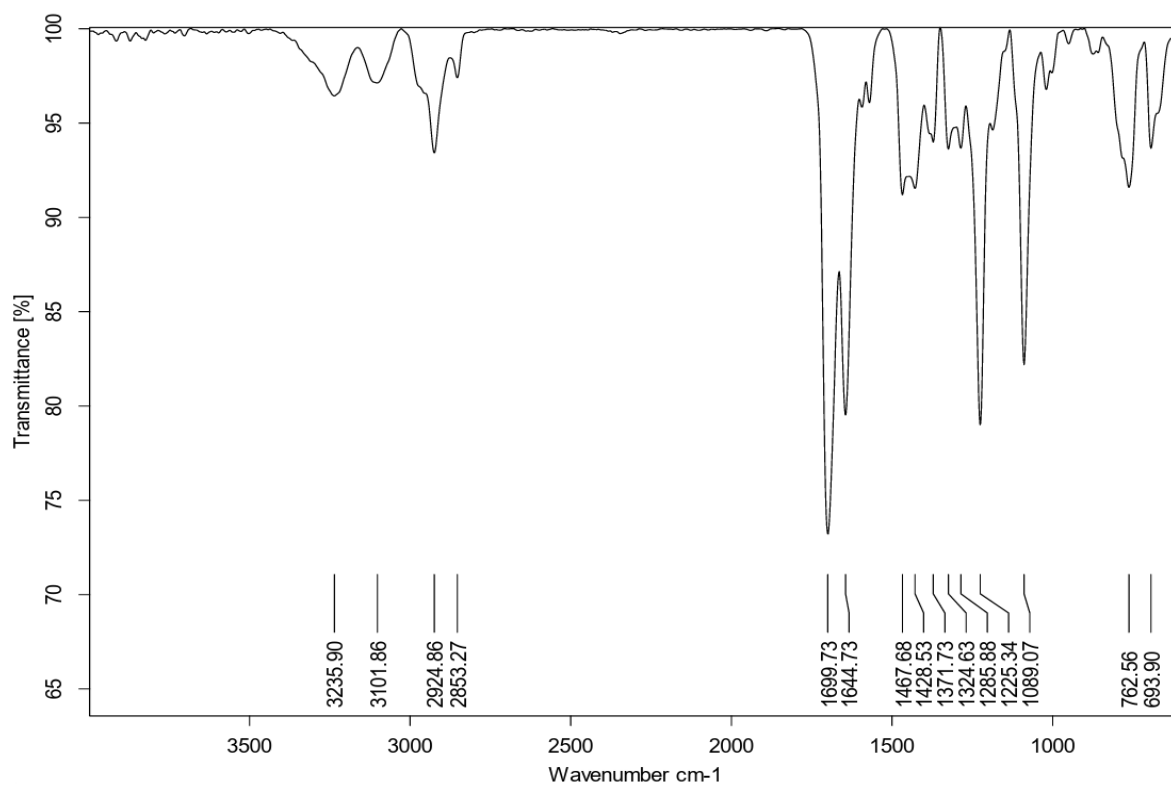

**Figure S10.** The FTIR spectrum of **4d**.



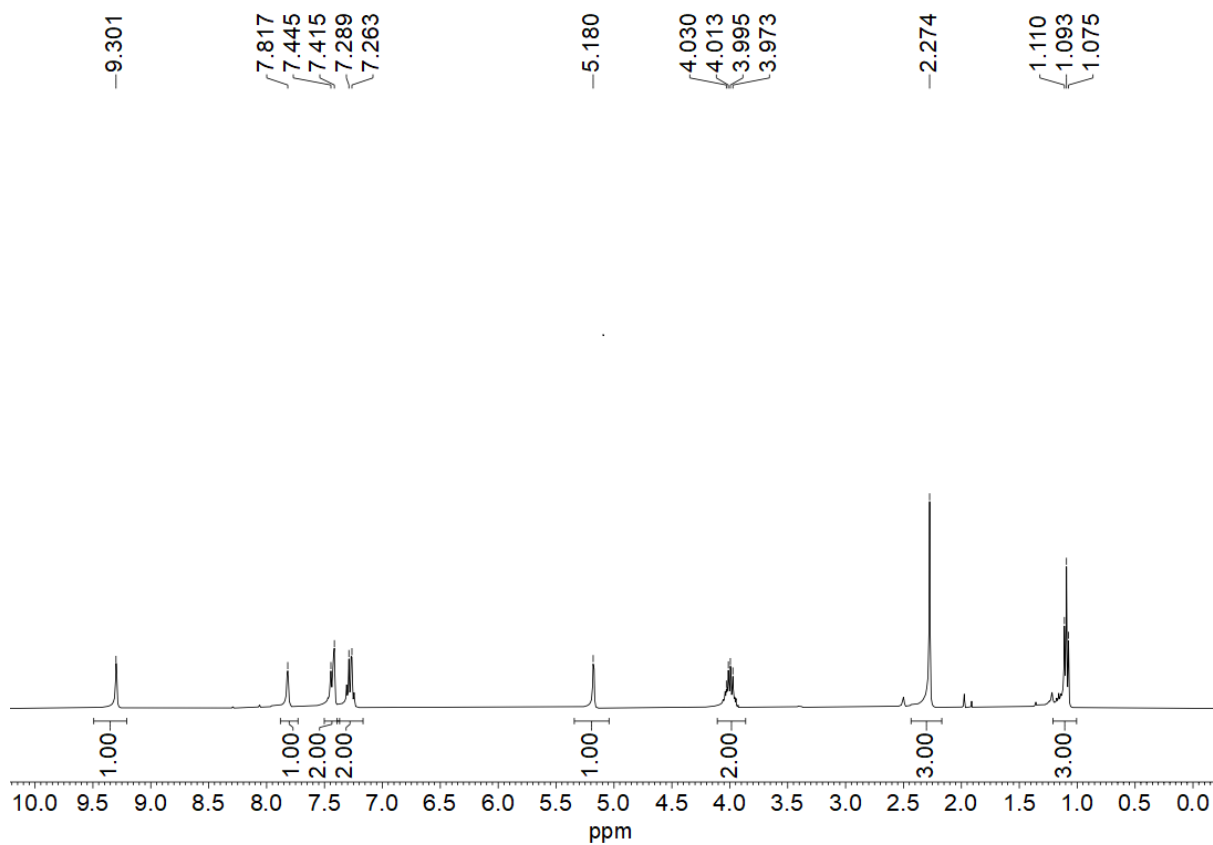

**Figure S11.** The  $^1\text{H}$ -NMR spectrum of **4d**.

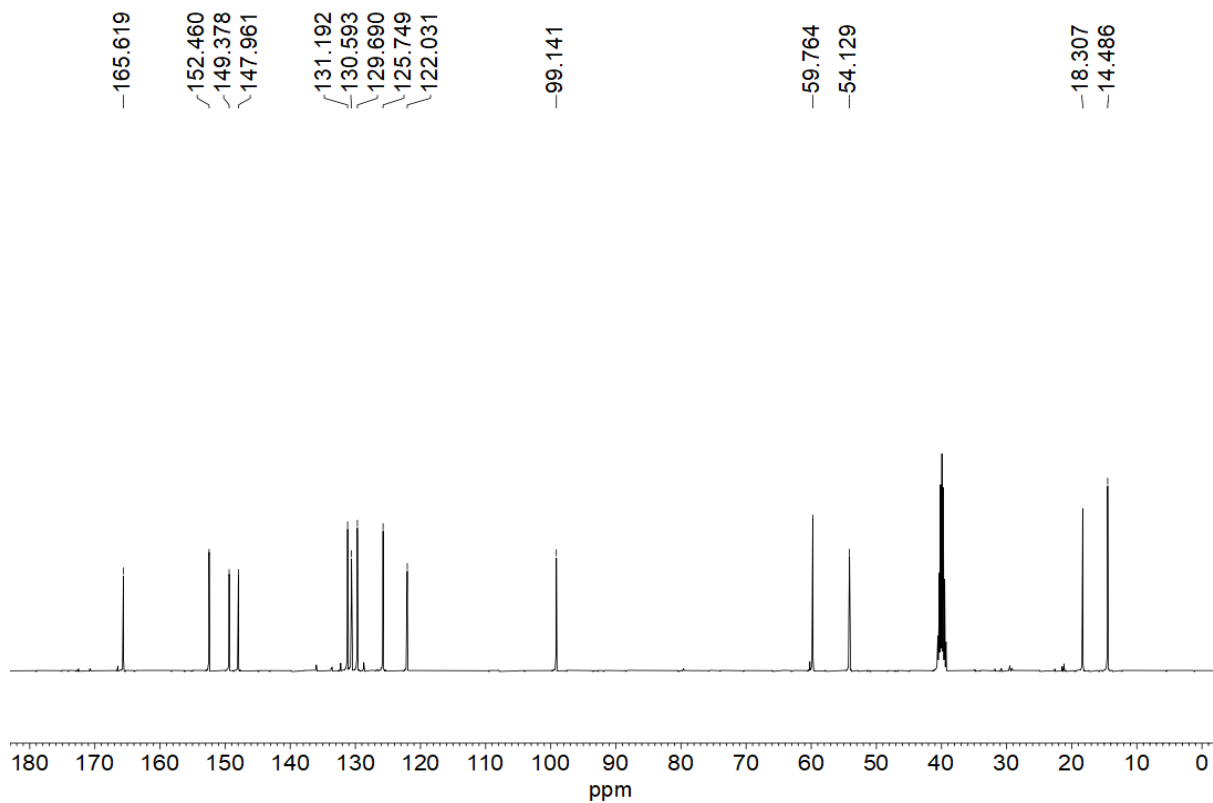

**Figure S12.** The  $^{13}\text{C}$ -NMR spectrum of **4d**.

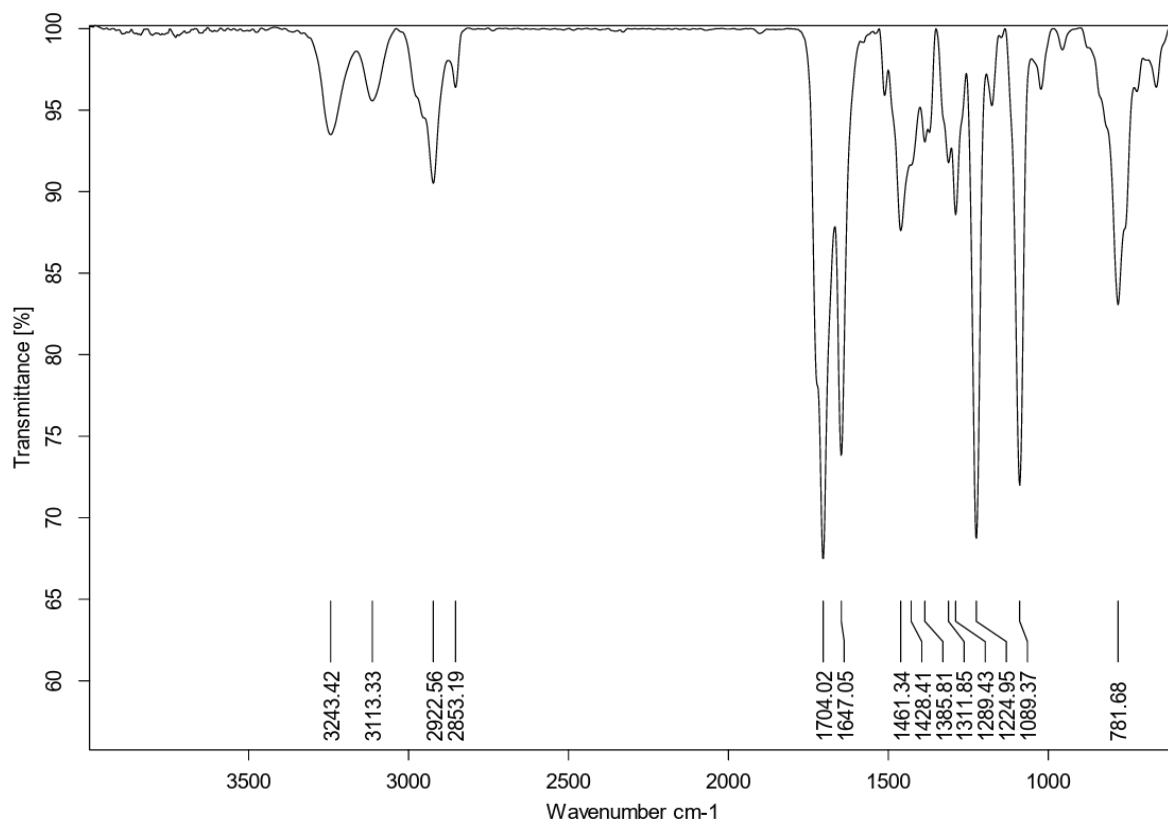

**Figure S13.** The FTIR spectrum of **4e**.

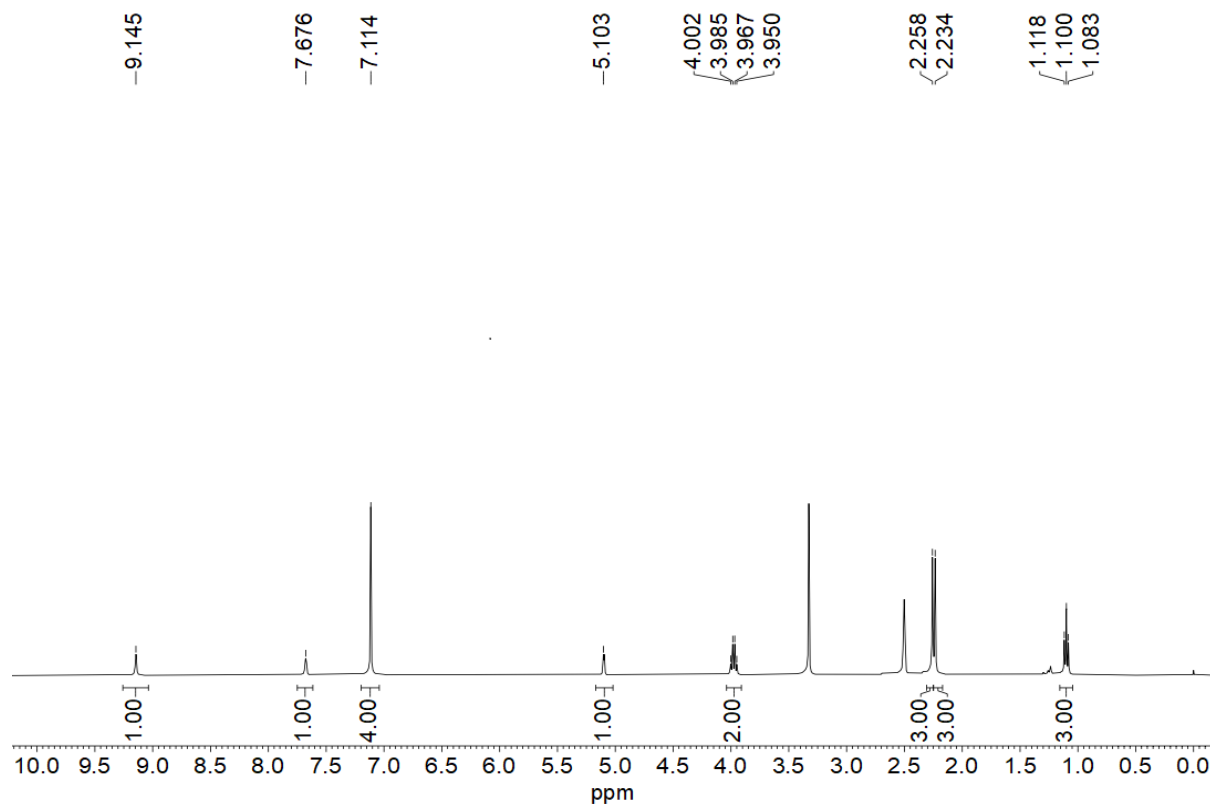

**Figure S14.** The <sup>1</sup>H-NMR spectrum of **4e**.

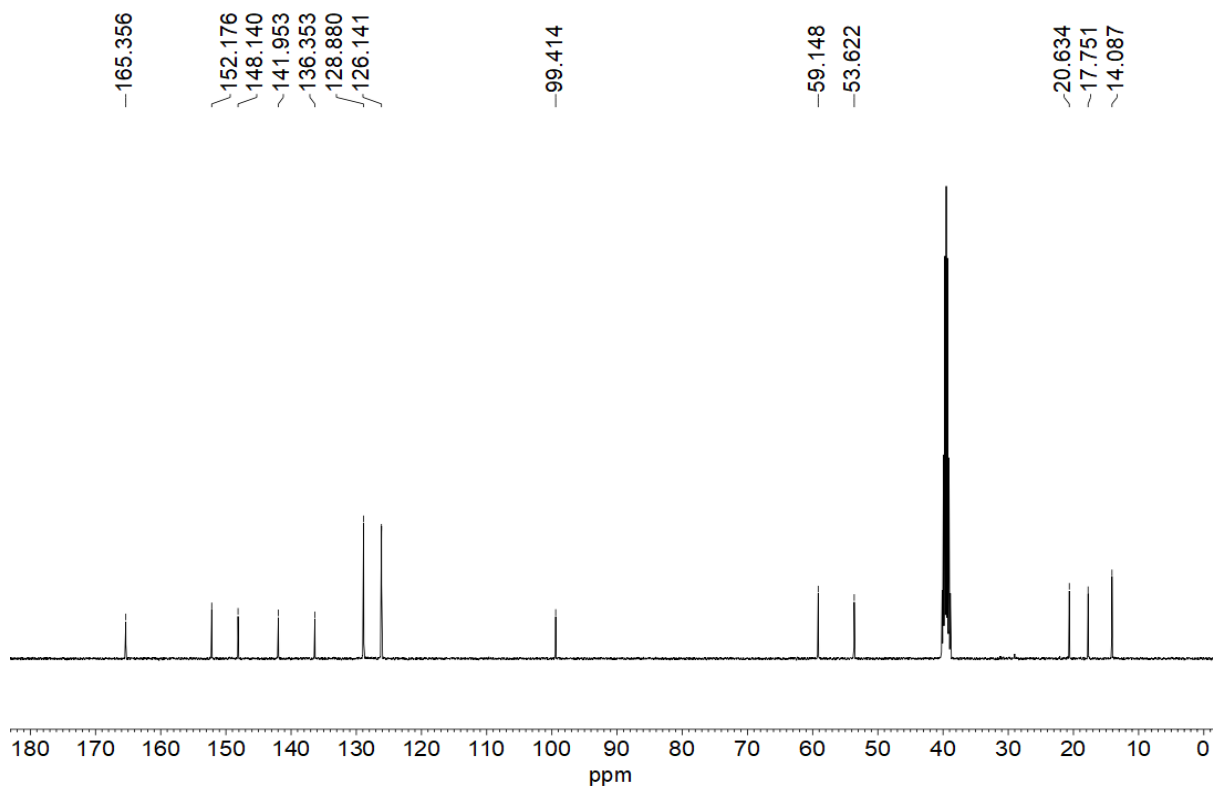

**Figure S15.** The  $^{13}\text{C}$ -NMR spectrum of **4e**.

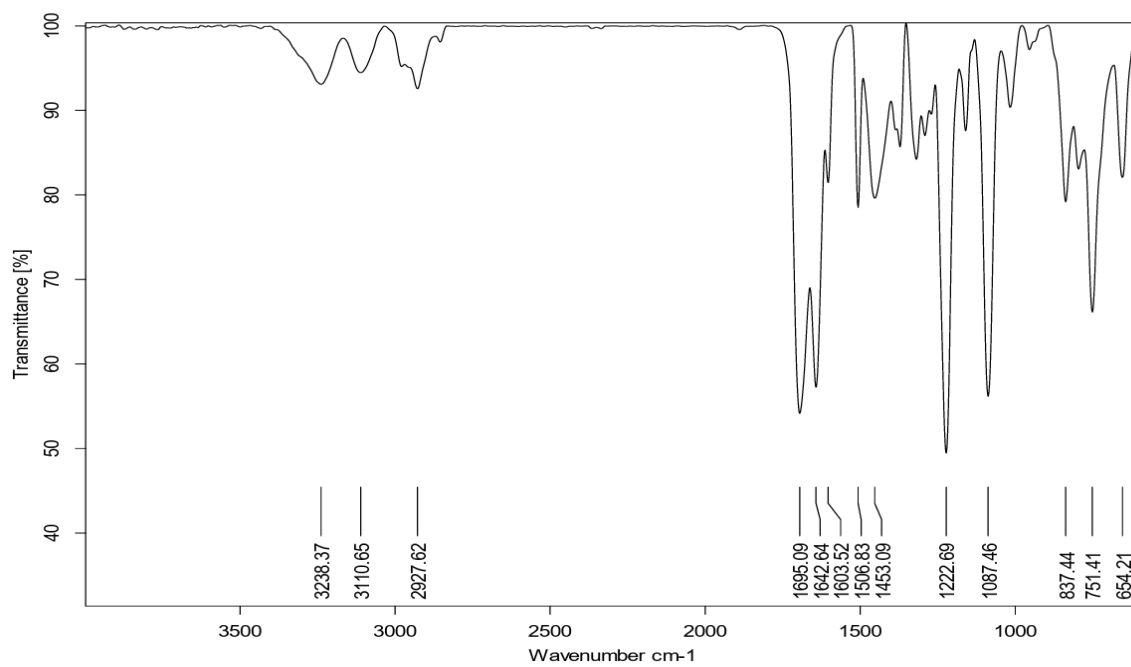

**Figure S16.** The FTIR spectrum of **4f**.

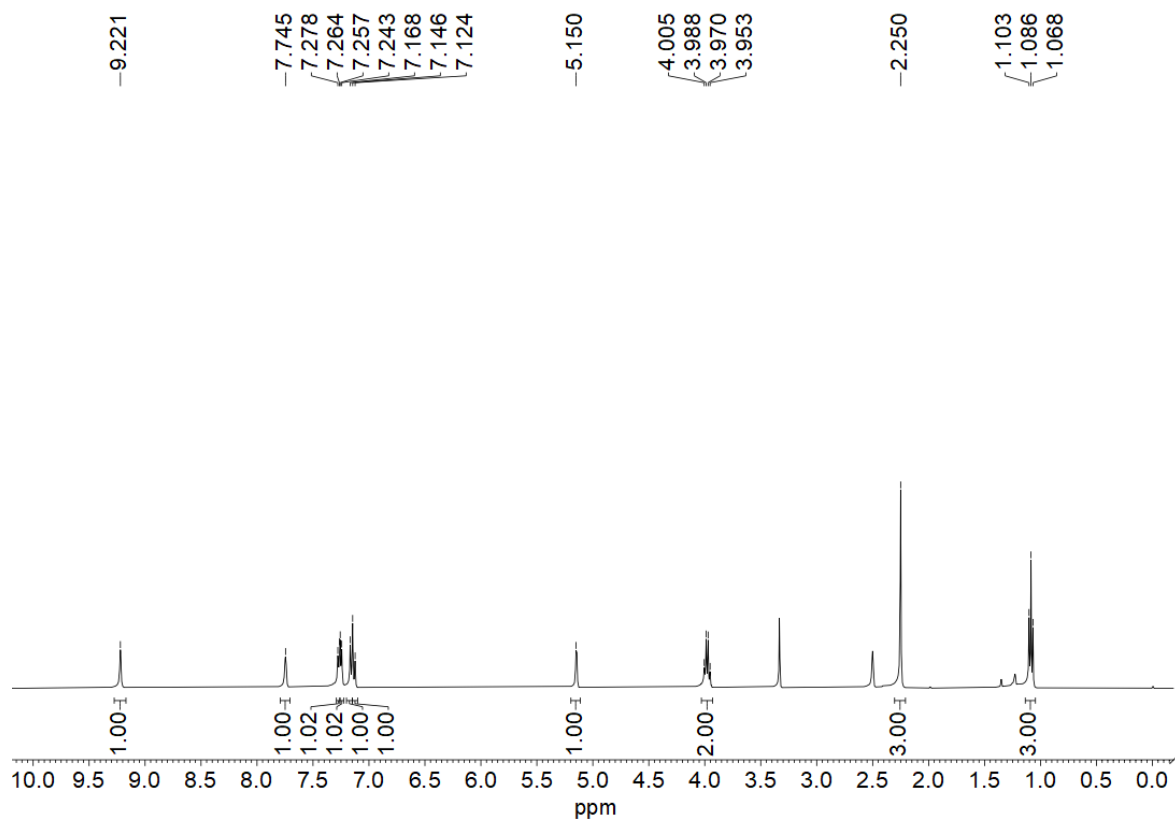

**Figure S17.** The  $^1\text{H}$ -NMR spectrum of **4f**.

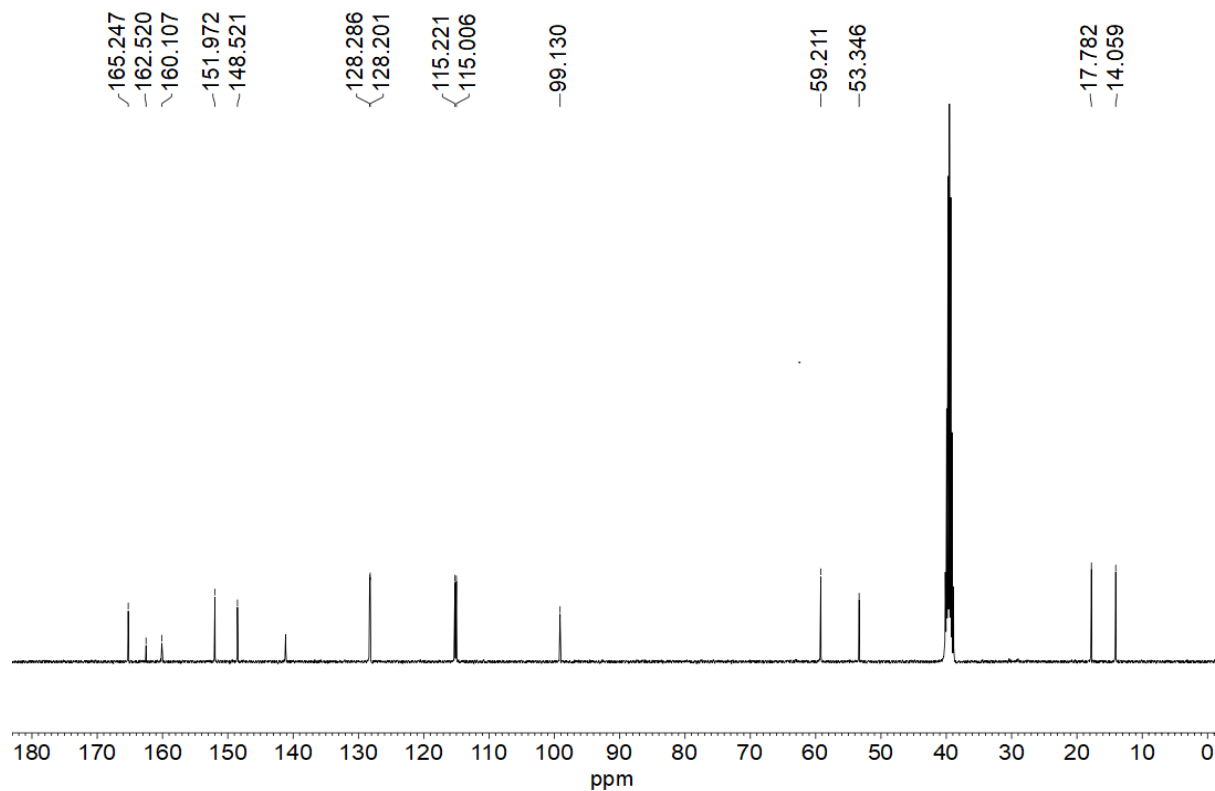

**Figure S18.** The  $^{13}\text{C}$ -NMR spectrum of **4f**.

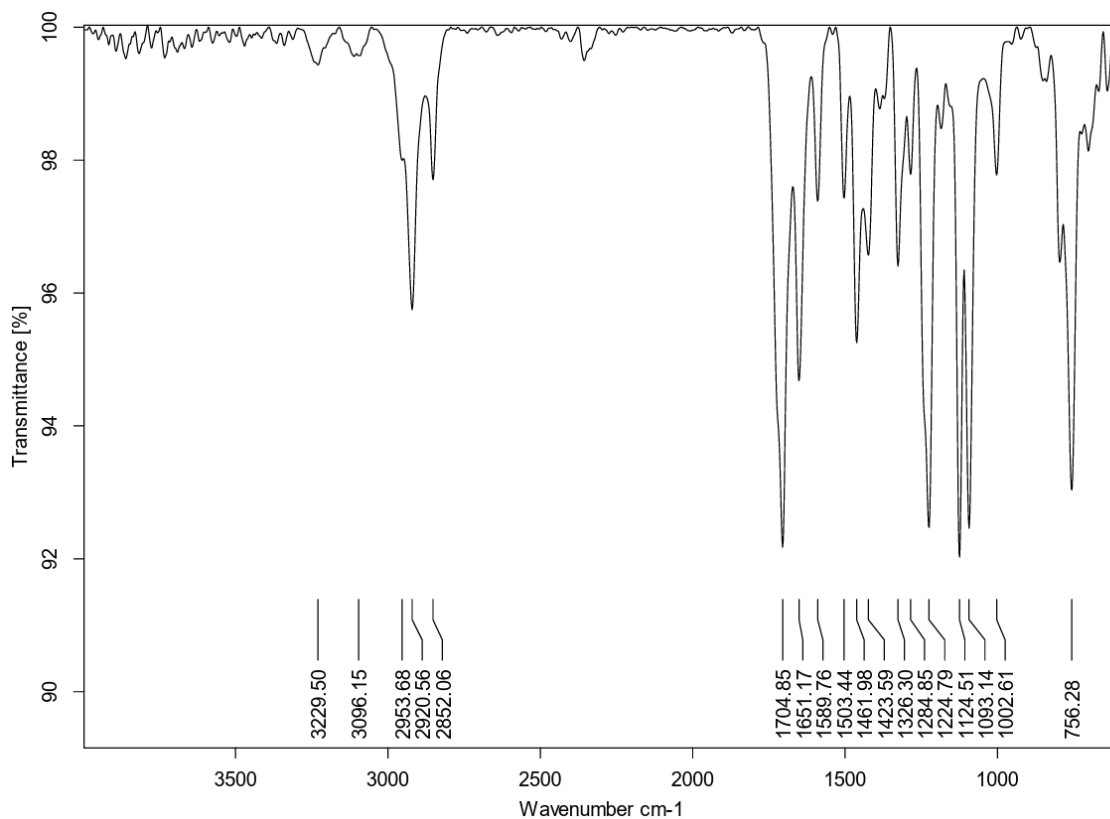

**Figure S19.** The FTIR spectrum of **4g**.

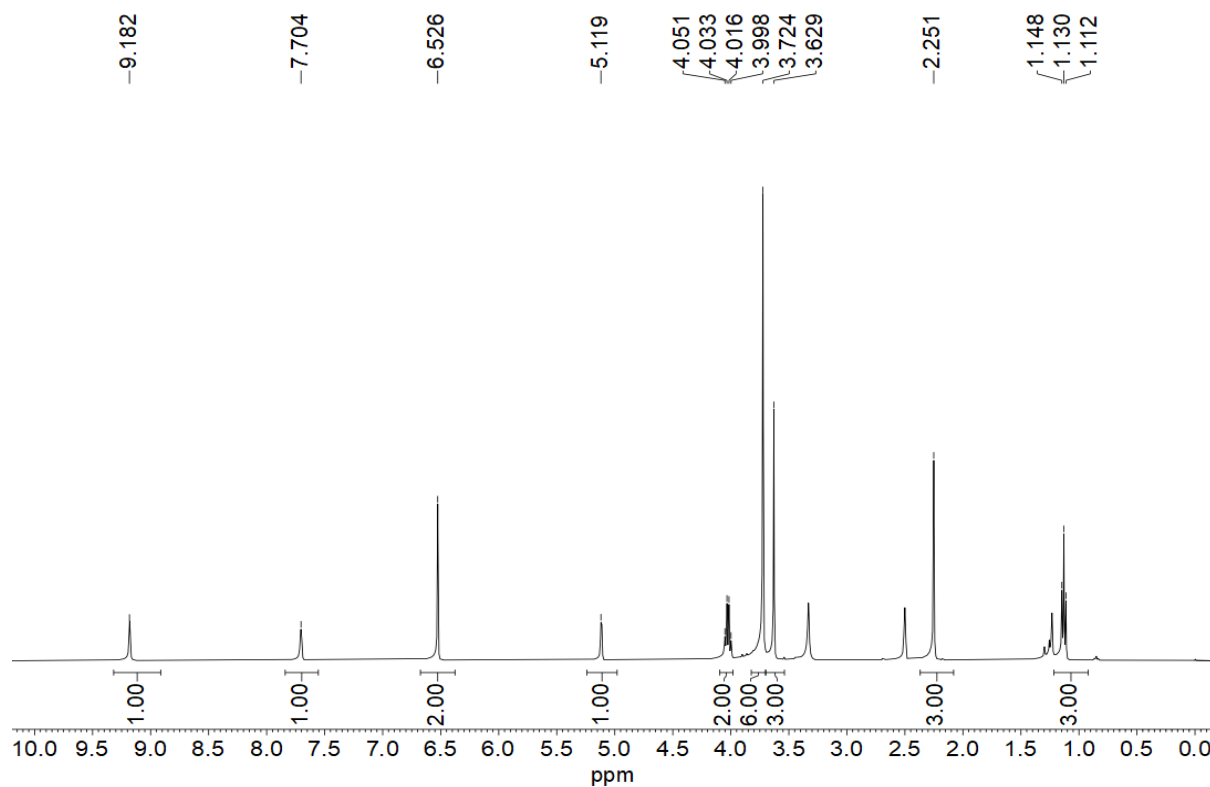

**Figure S20.** The <sup>1</sup>H-NMR spectrum of **4g**.

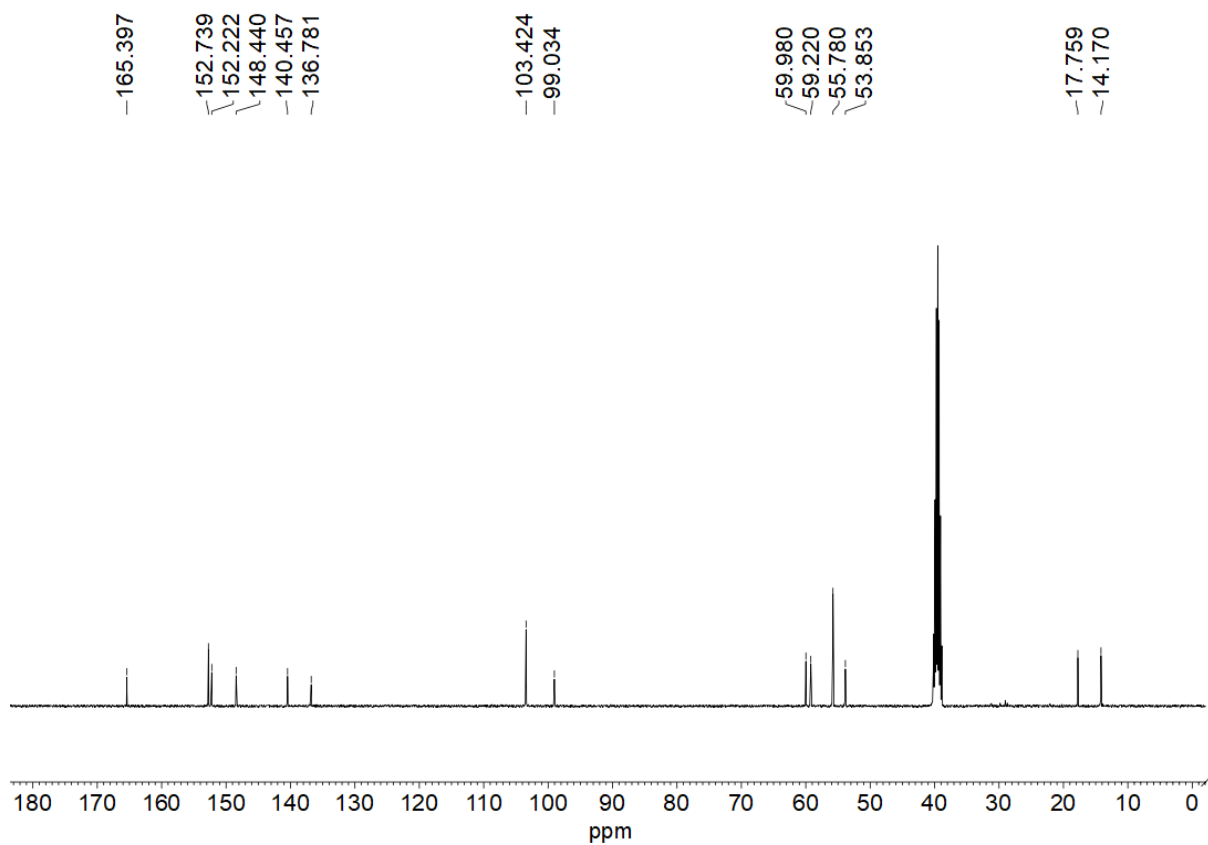

**Figure S21.** The  $^{13}\text{C}$ -NMR spectrum of **4g**.

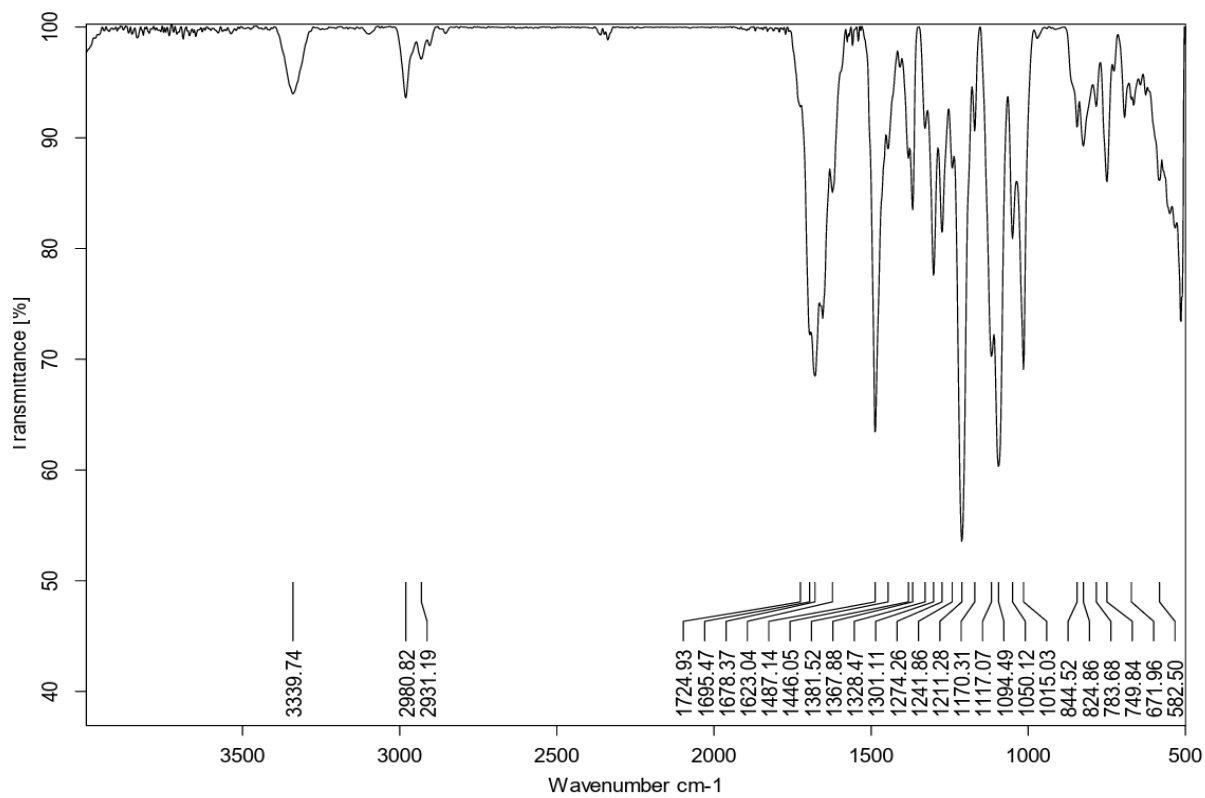

**Figure S22.** The FTIR spectrum of **4h**.

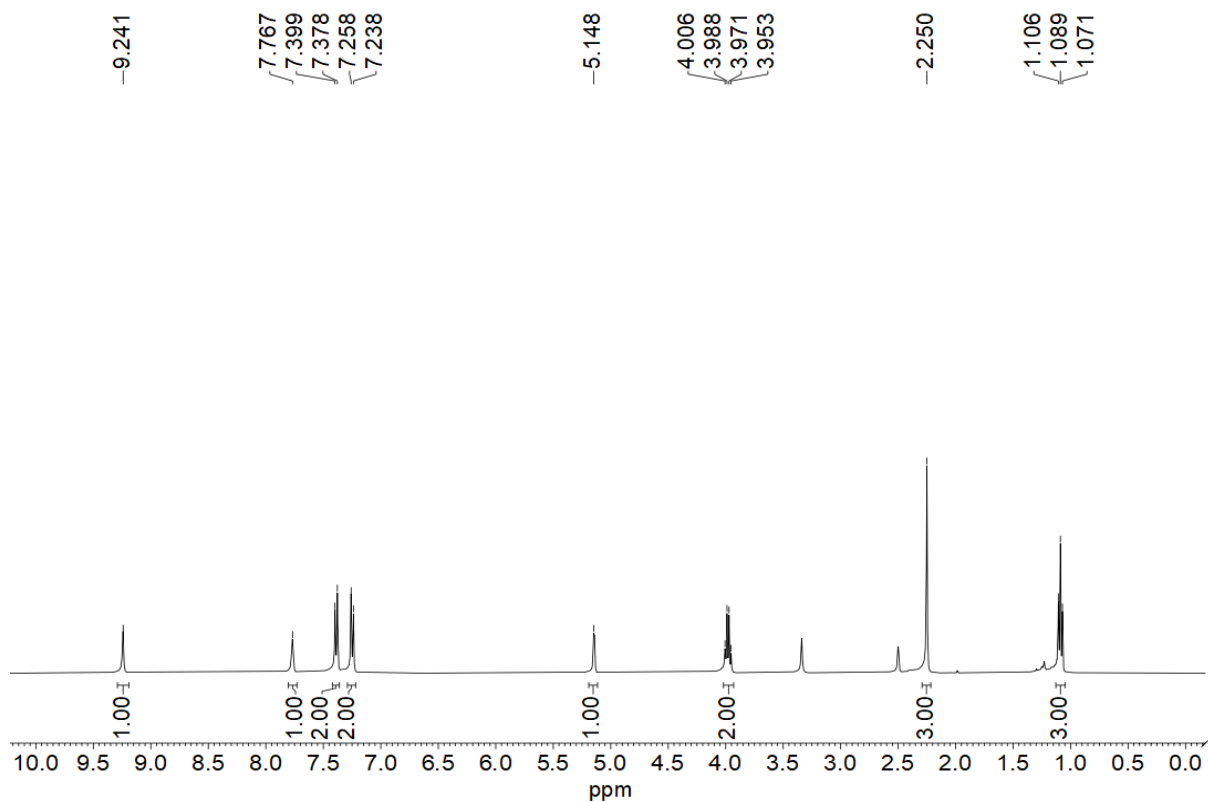

**Figure S23.** The  $^1\text{H}$ -NMR spectrum of **4h**.

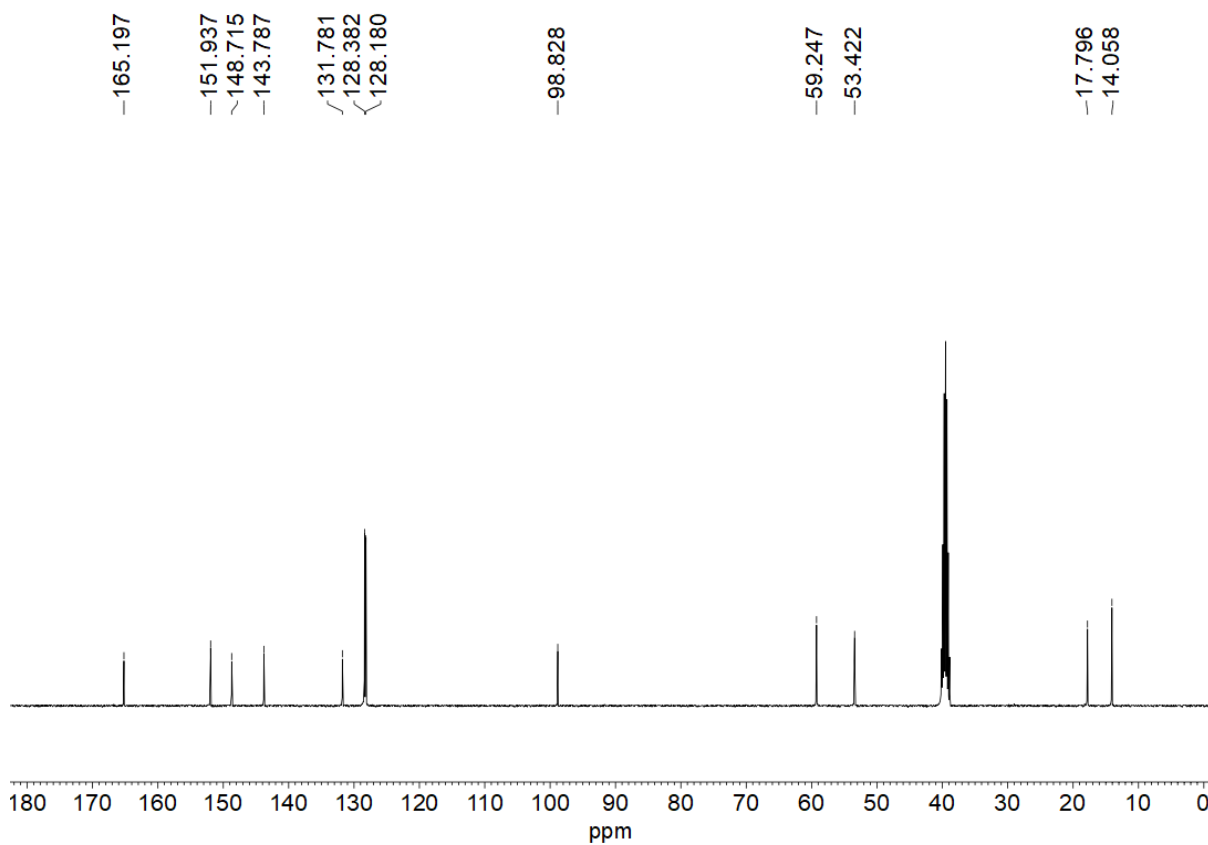

**Figure S24.** The  $^{13}\text{C}$ -NMR spectrum of **4h**.

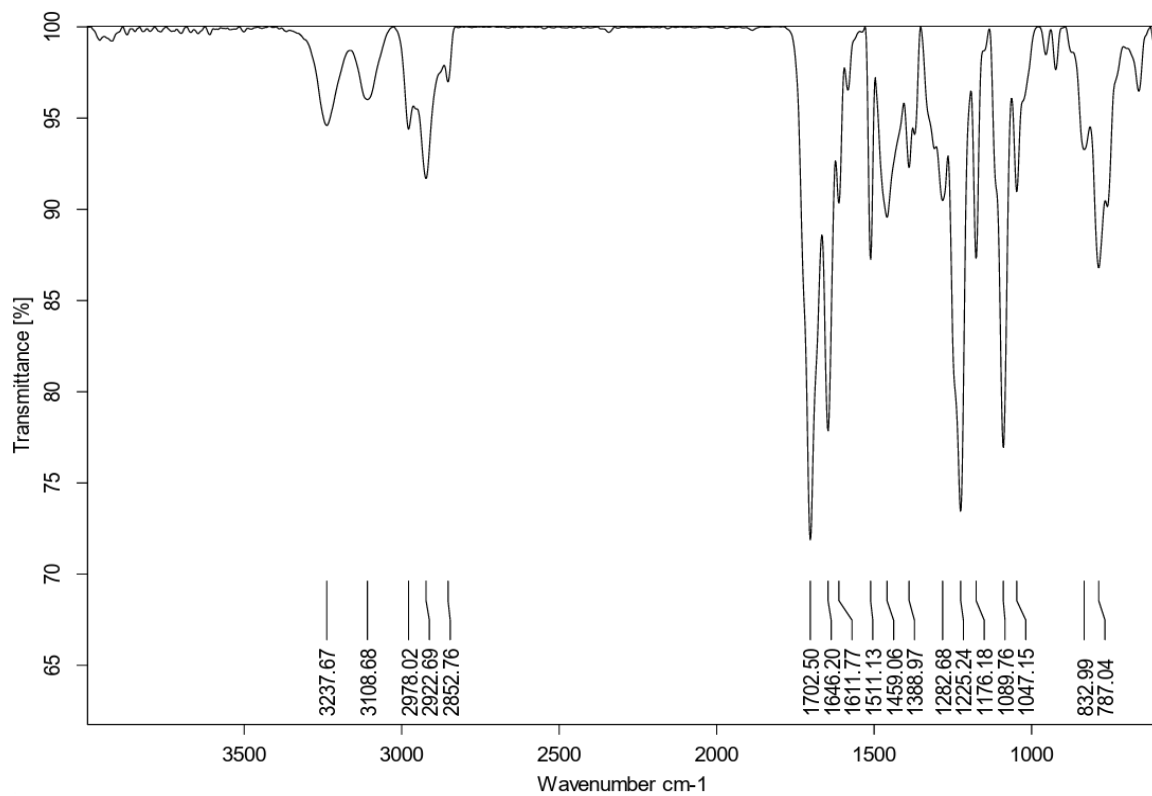

**Figure S25.** The FTIR spectrum of **4i**.

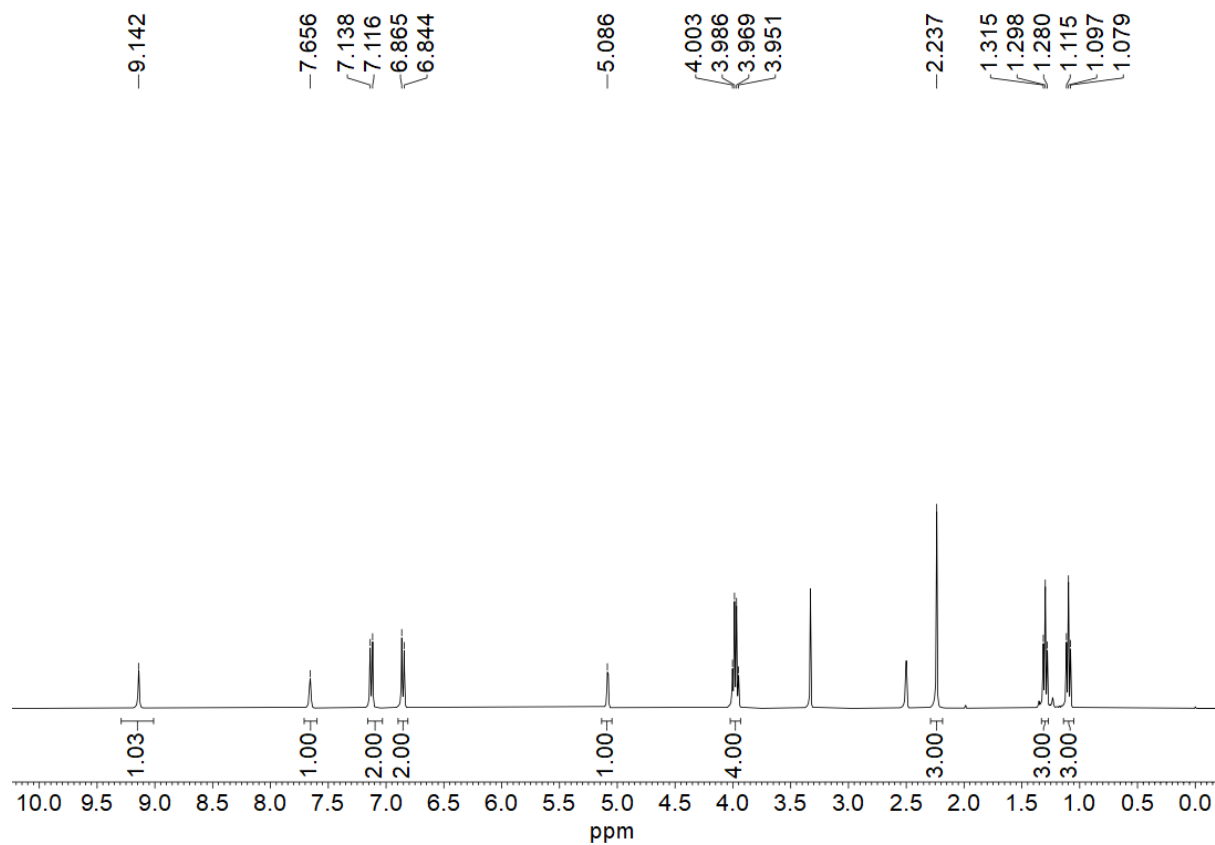

**Figure S26.** The <sup>1</sup>H-NMR spectrum of **4i**.



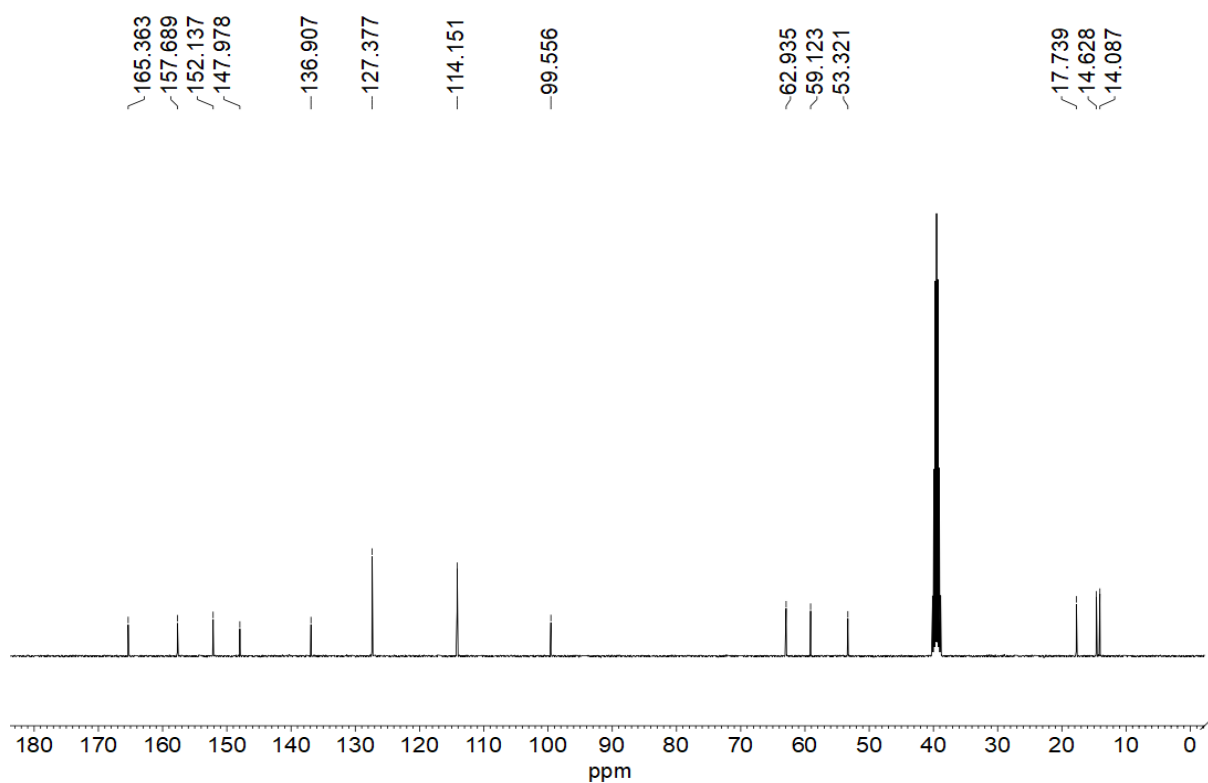

**Figure S27.** The  $^{13}\text{C}$ -NMR spectrum of **4i**.

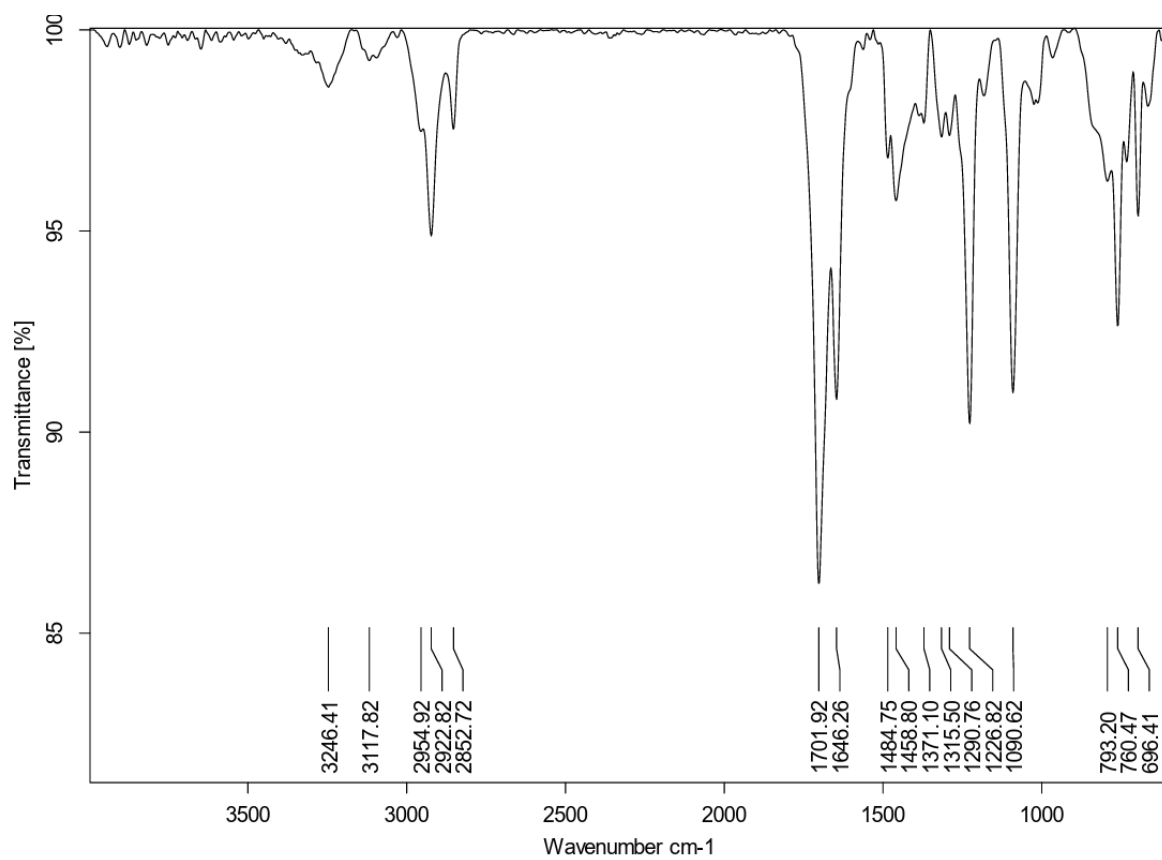

**Figure S28.** The FTIR spectrum of **4j**.

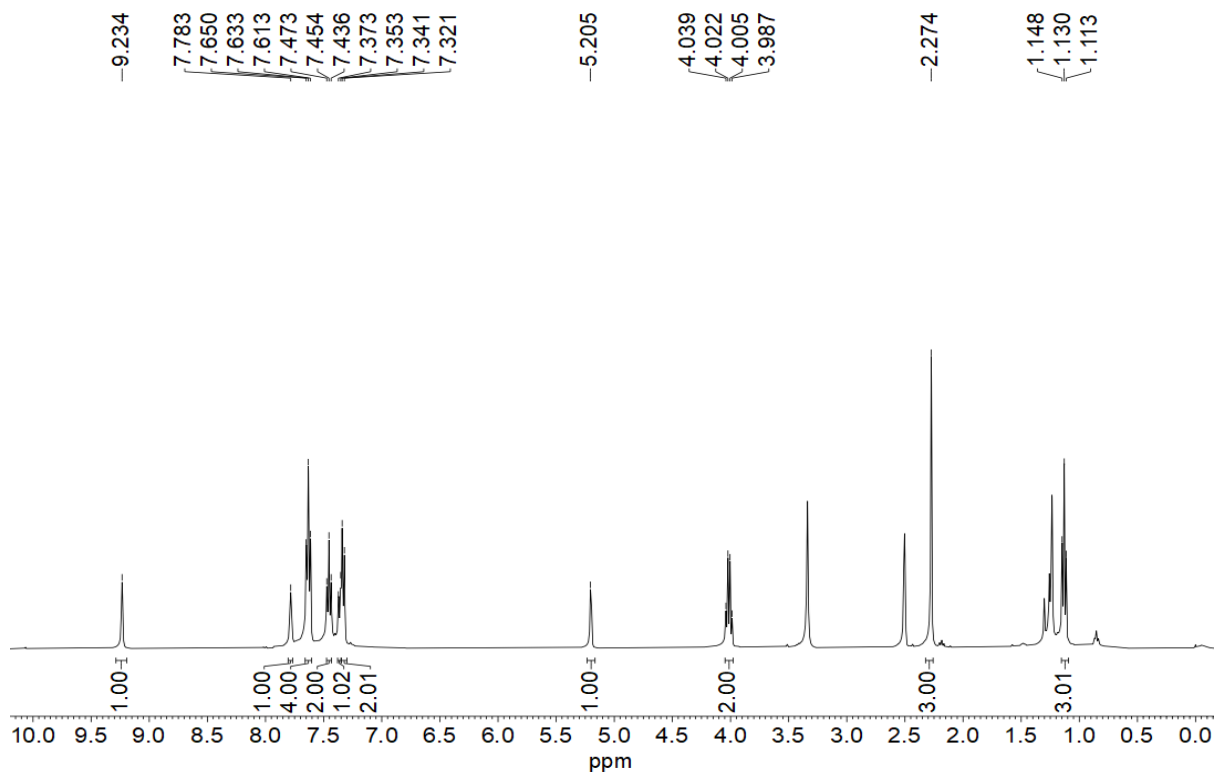

**Figure S29.** The  $^1\text{H}$ -NMR spectrum of **4j**.

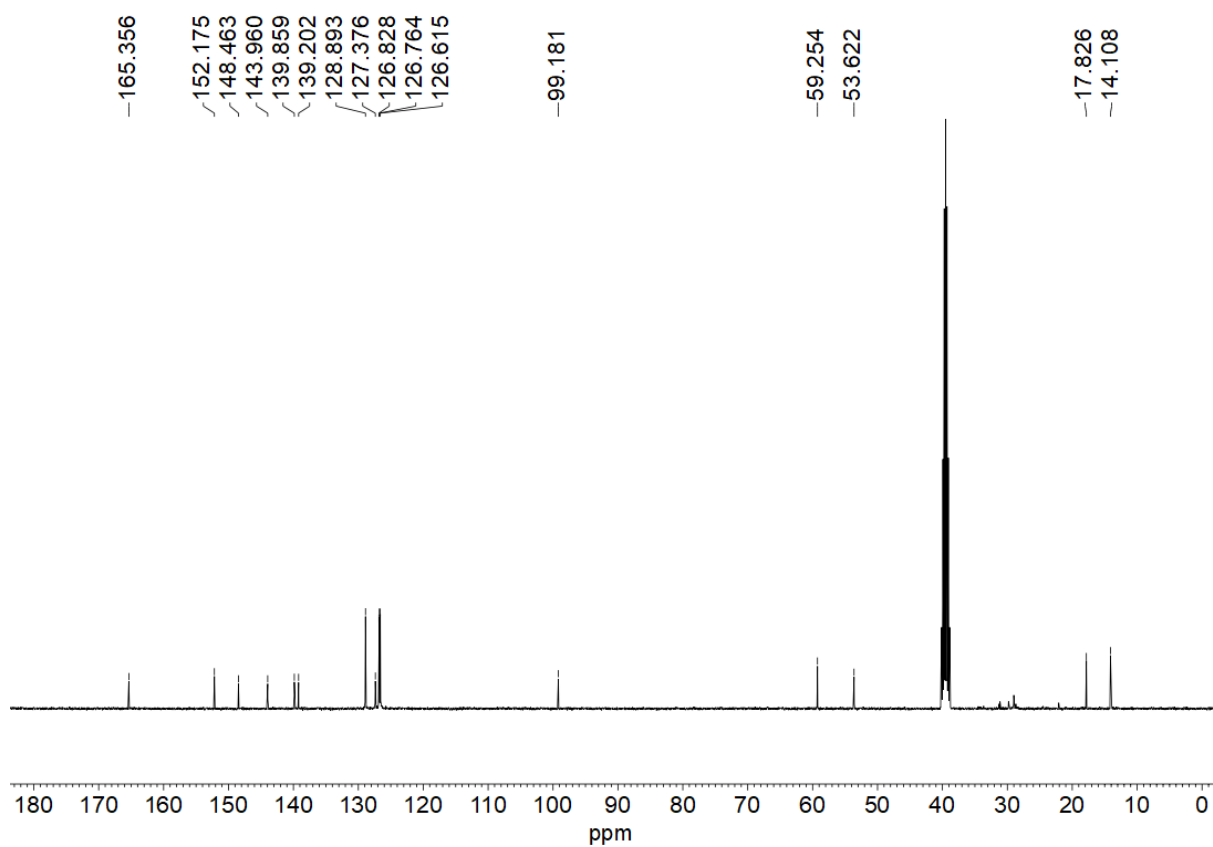

**Figure S30.** The  $^{13}\text{C}$ -NMR spectrum of **4j**.

## Characterization data of synthesized 1,4-Dihydropyridines (DHPs)

Diethyl-2,6-dimethyl-4-phenyl-1,4-dihydropyridine-3,5-dicarboxylate (**6a**):<sup>4,5</sup> Light yellow solid (1.427 g, 92%), Melting Point (°C): 156-157; <sup>1</sup>H-NMR (400 MHz, DMSO-d<sub>6</sub>, δ ppm): 8.79 (s, 1H), 7.20 (d, 2H, *J* = 7.6 Hz), 7.16 (t, 2H, *J* = 7.6 Hz), 7.08 (t, 1H, *J* = 7.6 Hz), 4.87 (s, 1H), 3.99 (q, 4H, *J* = 7 Hz), 2.26 (s, 6H), 1.12 (t, 6H, *J* = 7 Hz); <sup>13</sup>C-NMR (100 MHz, DMSO-d<sub>6</sub>, δ ppm): 166.9, 148.2, 145.3, 127.8, 127.3, 125.8, 101.9, 59.0, 38.9, 18.2, 14.1; FTIR (ATR, cm<sup>-1</sup>): 3339, 2954, 2920, 1735, 1682.

Diethyl-4-(4-methoxyphenyl)-2,6-dimethyl-1,4-dihydropyridine-3,5-dicarboxylate (**6b**):<sup>4,5</sup> Light yellow solid (1.187 g, 90%), Melting Point (°C): 157-159; <sup>1</sup>H-NMR (400 MHz, DMSO-d<sub>6</sub>, δ ppm): 8.74 (s, 1H), 7.05 (d, 2H, *J* = 8 Hz), 6.76 (d, 2H, *J* = 8 Hz), 4.80 (s, 1H), 3.99 (q, 4H, *J* = 6.8 Hz), 3.67 (s, 3H), 2.25 (s, 6H), 1.13 (t, 6H, *J* = 6.8 Hz); <sup>13</sup>C-NMR (100 MHz, DMSO-d<sub>6</sub>, δ ppm): 167.6, 158.0, 145.5, 141.1, 128.8, 113.7, 102.7, 59.5, 55.4, 38.5, 18.7, 14.7; FTIR (ATR, cm<sup>-1</sup>): 3339, 2979, 2904, 1693, 1678.

Diethyl-2,6-dimethyl-4-(4-nitrophenyl)-1,4-dihydropyridine-3,5-dicarboxylate (**6c**):<sup>4,5</sup> Light yellow solid (1.090 g, 88%), Melting Point (°C): 131-132; <sup>1</sup>H-NMR (400 MHz, CDCl<sub>3</sub>, δ ppm): 8.06 (d, 2H, *J* = 8.8 Hz), 7.44 (d, 2H, *J* = 8.8 Hz), 6.08 (s, 1H), 5.08 (s, 1H), 4.07 (q, 4H, *J* = 7.2 Hz), 2.32 (s, 6H), 1.20 (t, 6H, *J* = 7.2 Hz); <sup>13</sup>C-NMR (100 MHz, CDCl<sub>3</sub>, δ ppm): 167.3, 155.4, 146.4, 145.1, 129.0, 123.4, 103.2, 60.1, 40.3, 19.7, 14.4; FTIR (ATR, cm<sup>-1</sup>): 3344, 2955, 2922, 1694, 1680.

Diethyl-4-(4-bromophenyl)-2,6-dimethyl-1,4-dihydropyridine-3,5-dicarboxylate (**6d**):<sup>4</sup> Light yellow solid (0.970 g, 88%), Melting Point (°C): 163-165; <sup>1</sup>H-NMR (400 MHz, DMSO-d<sub>6</sub>, δ ppm): 8.84 (s, 1H), 7.39 (d, 2H, *J* = 8.2 Hz), 7.11 (d, 2H, *J* = 8.2 Hz), 4.85 (s, 1H), 3.98 (q, 4H, *J* = 7.2 Hz), 2.27 (s, 6H), 1.12 (t, 6H, *J* = 7.2 Hz); <sup>13</sup>C-NMR (100 MHz, DMSO-d<sub>6</sub>, δ ppm): 166.8, 147.5, 145.6, 130.7, 129.6, 118.9, 101.5, 59.1, 38.7, 18.2, 14.1; FTIR (ATR, cm<sup>-1</sup>): 3336, 2956, 2924, 1695, 1679.

Diethyl-2,6-dimethyl-4-(p-tolyl)-1,4-dihydropyridine-3,5-dicarboxylate (**6e**):<sup>4</sup> Light yellow solid (1.271 g, 89%), Melting Point (°C): 137-138; <sup>1</sup>H-NMR (400 MHz, DMSO-d<sub>6</sub>, δ ppm): 8.75 (s, 1H), 7.03 (d, 2H, *J* = 8.2 Hz), 6.99 (d, 2H, *J* = 8.2 Hz), 4.82 (s, 1H), 3.97 (q, 4H, *J* = 7.2 Hz), 2.25 (s, 6H), 2.20 (s, 3H), 1.13 (t, 6H, *J* = 7.2 Hz); <sup>13</sup>C-NMR (100 MHz, DMSO-d<sub>6</sub>, δ ppm): 167.0, 145.3, 145.1, 134.7, 128.4, 127.2, 102.0, 85.9, 38.4, 20.5, 18.2, 14.1; FTIR (ATR, cm<sup>-1</sup>): 3332, 2955, 2923, 1694, 1623.

Diethyl-4-(4-fluorophenyl)-2,6-dimethyl-1,4-dihydropyridine-3,5-dicarboxylate (**6f**):<sup>4</sup> Light yellow solid (1.275 g, 91%), Melting Point (°C): 138-139; <sup>1</sup>H-NMR (400 MHz, CDCl<sub>3</sub>, δ ppm): 7.23 (d, 1H, *J* = 8.8 Hz), 7.21 (d, 1H, *J* = 8.8 Hz), 6.88 (d, 1H, *J* = 8.8 Hz), 6.86 (d, 1H, *J* = 8.8 Hz), 5.89 (s, 1H), 4.96 (s, 1H), 4.07 (q, 4H, *J* = 7.2 Hz), 2.30 (s, 6H), 1.21 (t, 6H, *J* = 7.2 Hz); <sup>13</sup>C-NMR (100 MHz, CDCl<sub>3</sub>, δ ppm): 167.8, 162.7, 160.3, 144.2, 143.9, 129.6, 129.5, 114.7, 114.5, 104.2, 59.9, 39.2, 19.6, 14.4; FTIR (ATR, cm<sup>-1</sup>): 3336, 2955, 2924, 1697, 1683.

Diethyl-2,6-dimethyl-4-(3,4,5-trimethoxyphenyl)-1,4-dihydropyridine-3,5-dicarboxylate (**6g**):<sup>5</sup> Light yellow solid (0.897 g, 84%), Melting Point (°C): 157-159; <sup>1</sup>H-NMR (400 MHz, CDCl<sub>3</sub>, δ ppm): 6.48 (s, 2H), 5.86 (s, 1H), 4.94 (s, 1H), 4.09 (q, 4H, 7.2 Hz), 3.76 (s, 9H), 2.30 (s, 6H), 1.21 (t, 6H, 7.2 Hz); <sup>13</sup>C-NMR (100 MHz, CDCl<sub>3</sub>, δ ppm): 167.8, 152.8, 144.0, 143.6, 136.7, 105.3, 104.2, 104.1, 60.9, 60.0, 56.1, 39.9, 19.8, 19.7, 14.6; FTIR (ATR, cm<sup>-1</sup>): 3338, 2955, 2923, 1692, 1654.

Diethyl-4-(4-chlorophenyl)-2,6-dimethyl-1,4-dihydropyridine-3,5-dicarboxylate (**6h**):<sup>4,5</sup> Light yellow solid (1.151 g, 89%), Melting Point (°C): 144-146; <sup>1</sup>H-NMR (400 MHz, DMSO-d<sub>6</sub>, δ ppm): 8.85 (s, 1H), 7.24 (d, 2H, *J* = 8.0 Hz), 7.19 (d, 2H, *J* = 8.0 Hz), 4.89 (s, 1H), 3.99 (q, 4H, *J* = 8.0 Hz), 2.29 (s, 6H), 1.11 (t, 6H, *J* = 8.0 Hz); <sup>13</sup>C-NMR (100 MHz, DMSO-d<sub>6</sub>, δ ppm): 166.8, 147.2, 145.6, 130.5, 129.3, 127.7, 101.6, 59.0, 38.7, 18.2, 14.1; FTIR (ATR, cm<sup>-1</sup>): 3328, 2980, 2931, 1728, 1675.

Diethyl-4-(4-ethoxyphenyl)-2,6-dimethyl-1,4-dihydropyridine-3,5-dicarboxylate (**6i**):<sup>4</sup> Light yellow solid (1.094 g, 88%), Melting Point (°C): 104-106; <sup>1</sup>H-NMR (400 MHz, CDCl<sub>3</sub>, δ ppm): 7.16 (d, 2H, *J* = 8.8 Hz), 6.72 (d, 2H, *J* = 8.8 Hz), 6.21 (s, 1H), 4.92 (s, 1H), 4.08 (q, 4H, *J* = 7.2 Hz), 3.95 (q, 2H, *J* = 7.2 Hz), 2.27 (s, 6H), 1.35 (t, 3H, *J* = 7.2 Hz), 1.21 (t, 6H, *J* = 7.2 Hz); <sup>13</sup>C-NMR (100 MHz, CDCl<sub>3</sub>, δ ppm): 168.0, 157.3, 144.1, 140.4, 129.0, 113.8, 104.1, 104.1, 63.3, 59.8, 38.8, 19.4, 19.4, 15.0, 14.4; FTIR (ATR, cm<sup>-1</sup>): 3335, 2956, 2921, 1693, 1662.

Diethyl-4-([1,1'-biphenyl]-4-yl)-2,6-dimethyl-1,4-dihydropyridine-3,5-dicarboxylate (**6j**):<sup>6,7</sup> Light yellow solid (0.912 g, 82%), Melting Point (°C): 140-142; <sup>1</sup>H-NMR (400 MHz, CDCl<sub>3</sub>, δ ppm): 7.46-7.19 (m, 9H), 6.05 (s, 1H), 4.96 (s, 1H), 4.02 (q, 4H, *J* = 7.2 Hz), 2.22 (s, 6H), 1.14 (t, 6H, *J* = 7.2 Hz); <sup>13</sup>C-NMR (100 MHz, CDCl<sub>3</sub>, δ ppm): 167.9, 147.1, 144.4, 141.3, 139.0, 128.8, 128.8, 128.5, 127.1, 127.0, 126.8, 104.0, 59.9, 39.5, 19.6, 14.4; FTIR (ATR, cm<sup>-1</sup>): 3345, 2955, 2924, 1694, 1679.

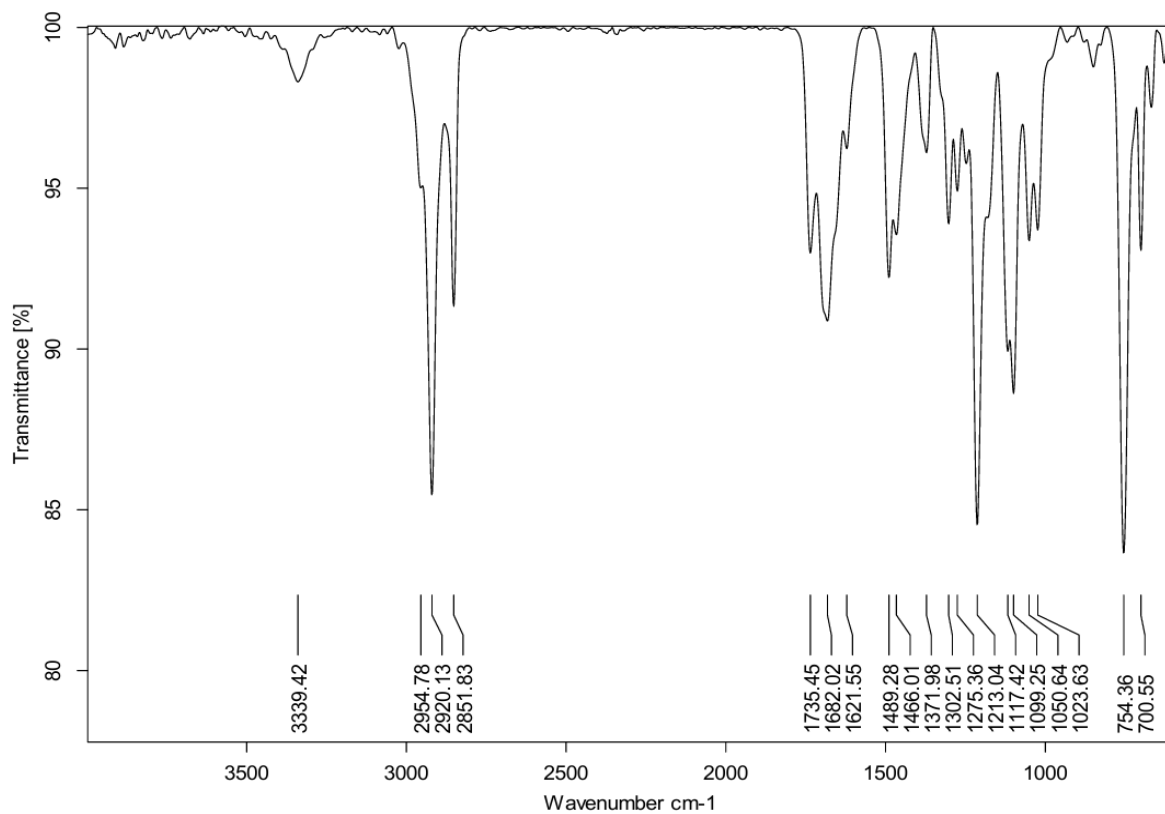

**Figure S31.** The FTIR spectrum of **6a**.

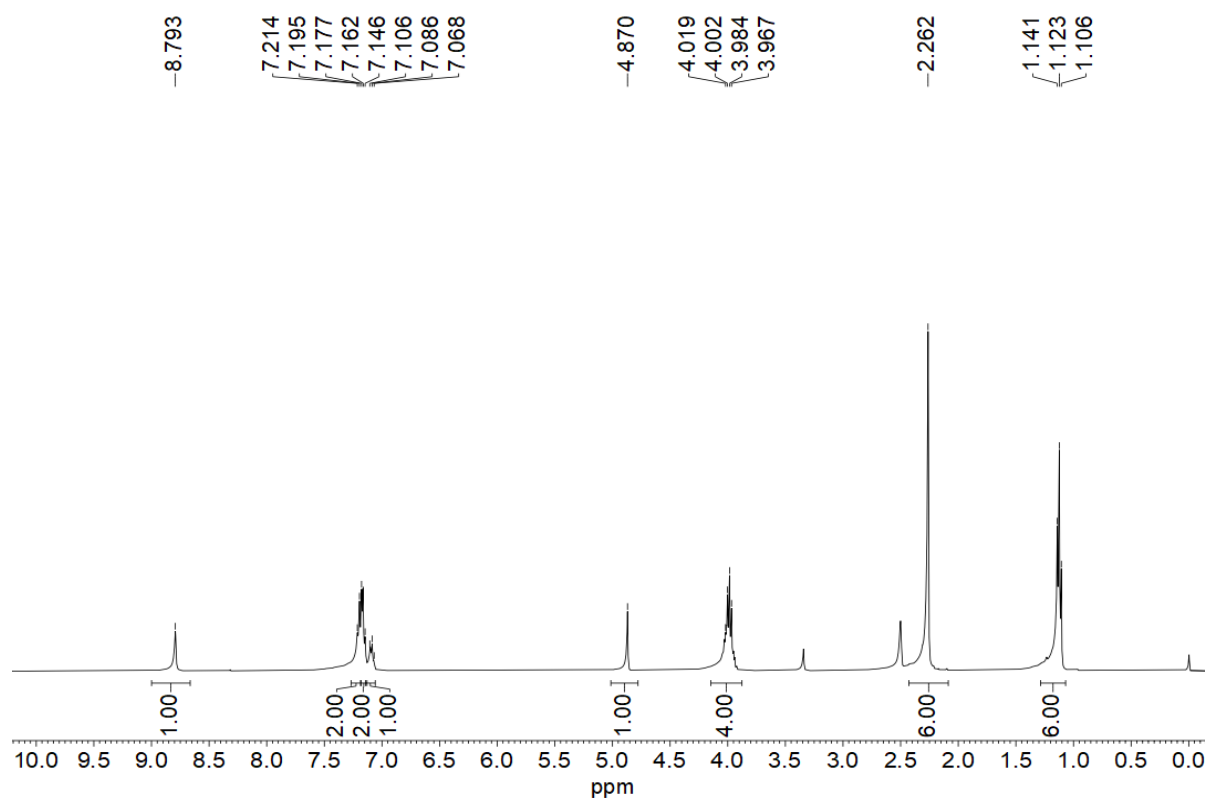

**Figure S32.** The <sup>1</sup>H-NMR spectrum of **6a**.

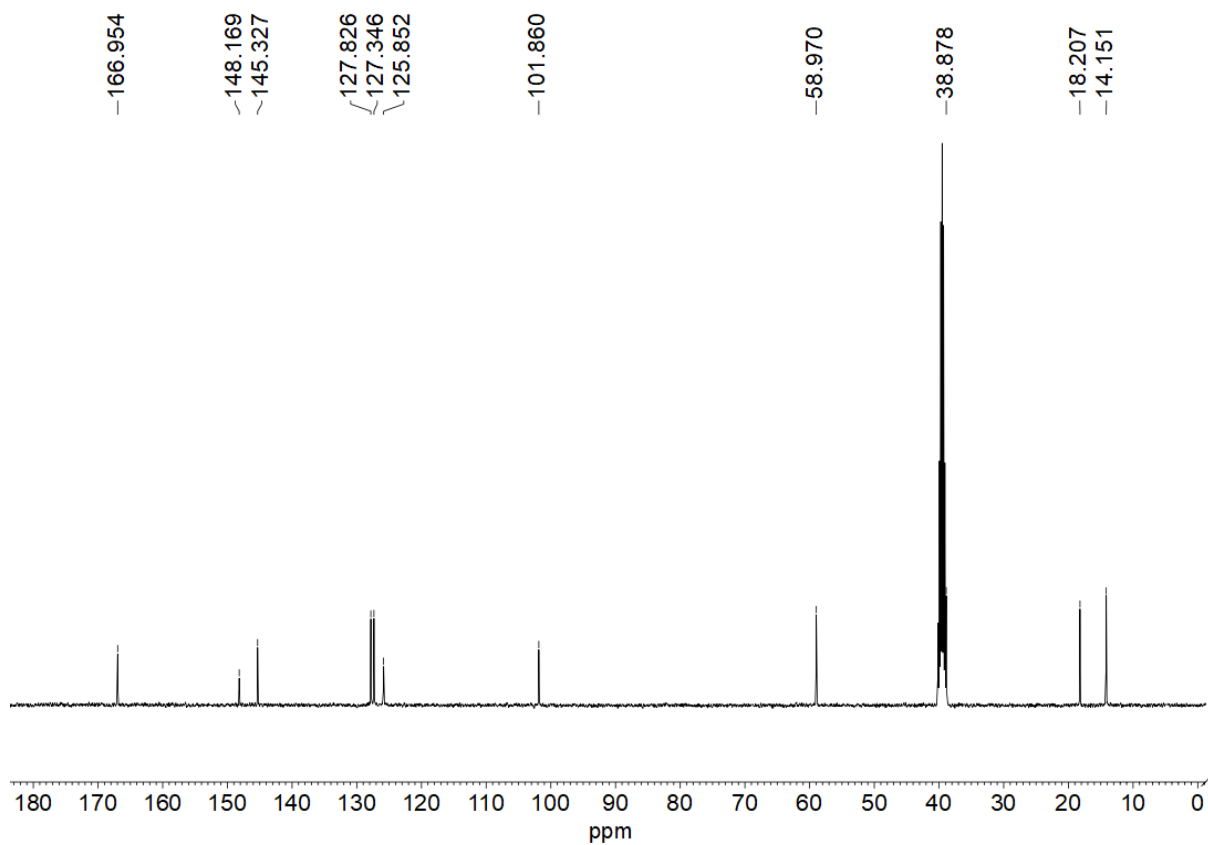

**Figure S33.** The  $^{13}\text{C}$ -NMR spectrum of **6a**.

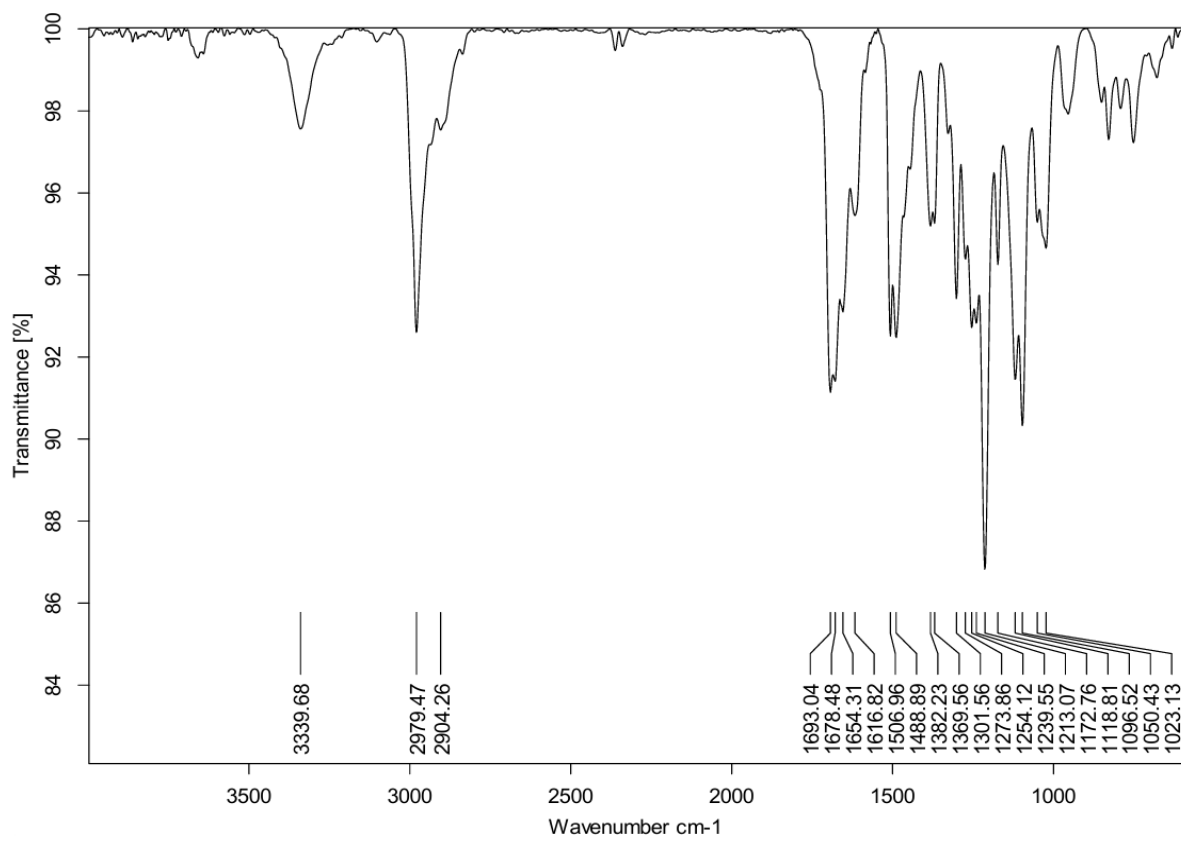

**Figure S34.** The FTIR spectrum of **6b**.

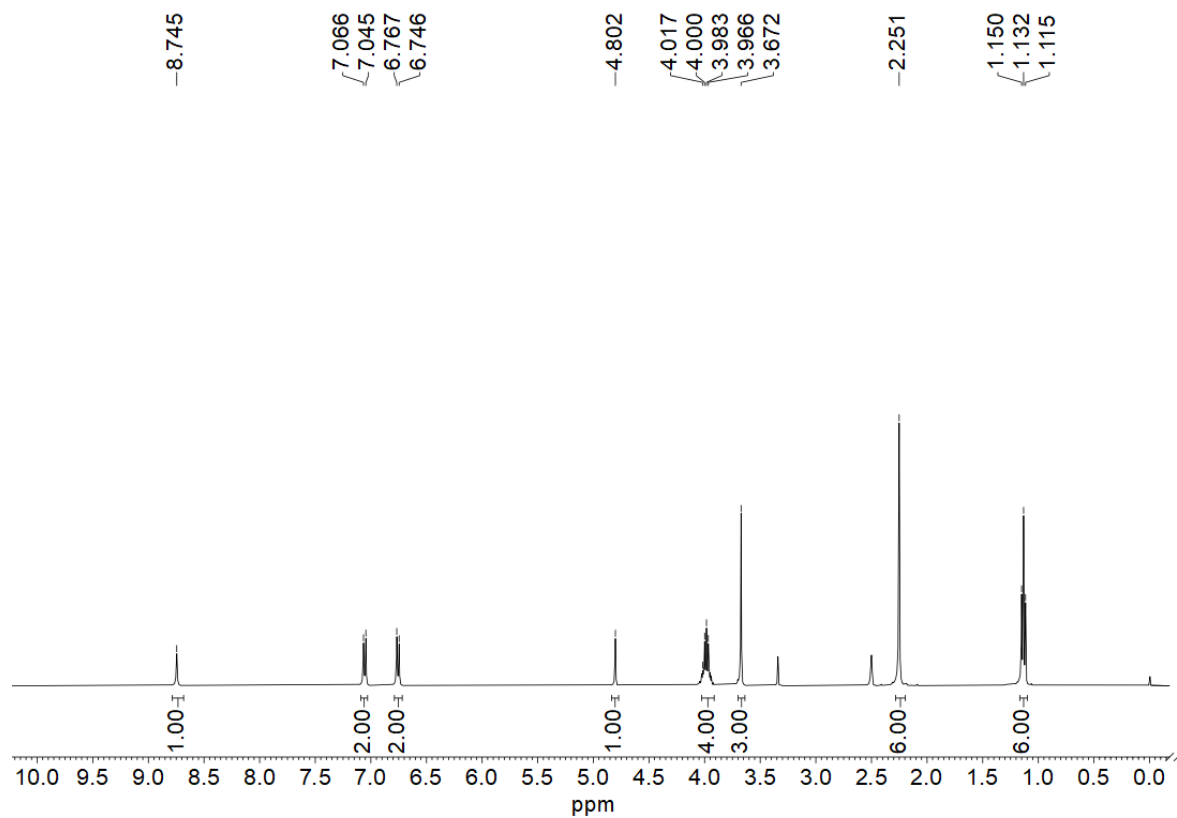

**Figure S35.** The  $^1\text{H}$ -NMR spectrum of **6b**.

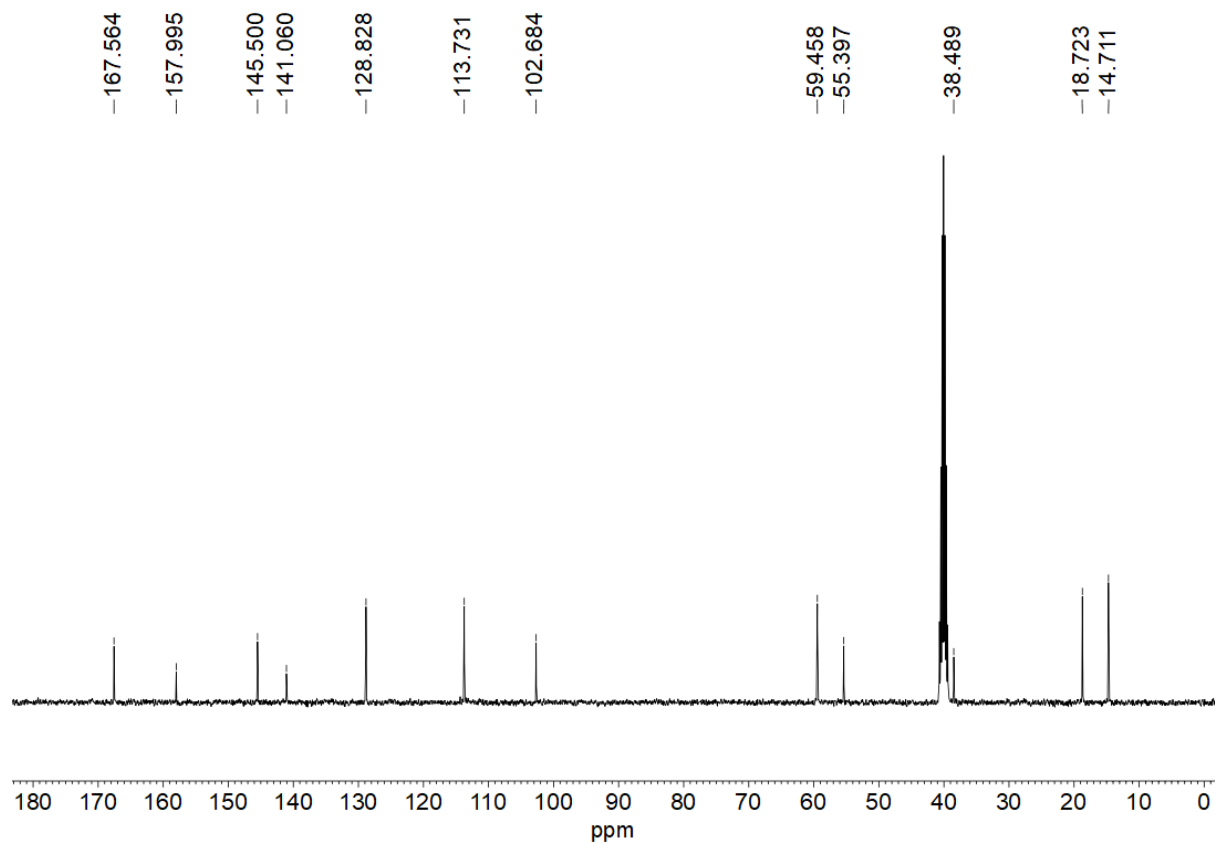

**Figure S36.** The  $^{13}\text{C}$ -NMR spectrum of **6b**.

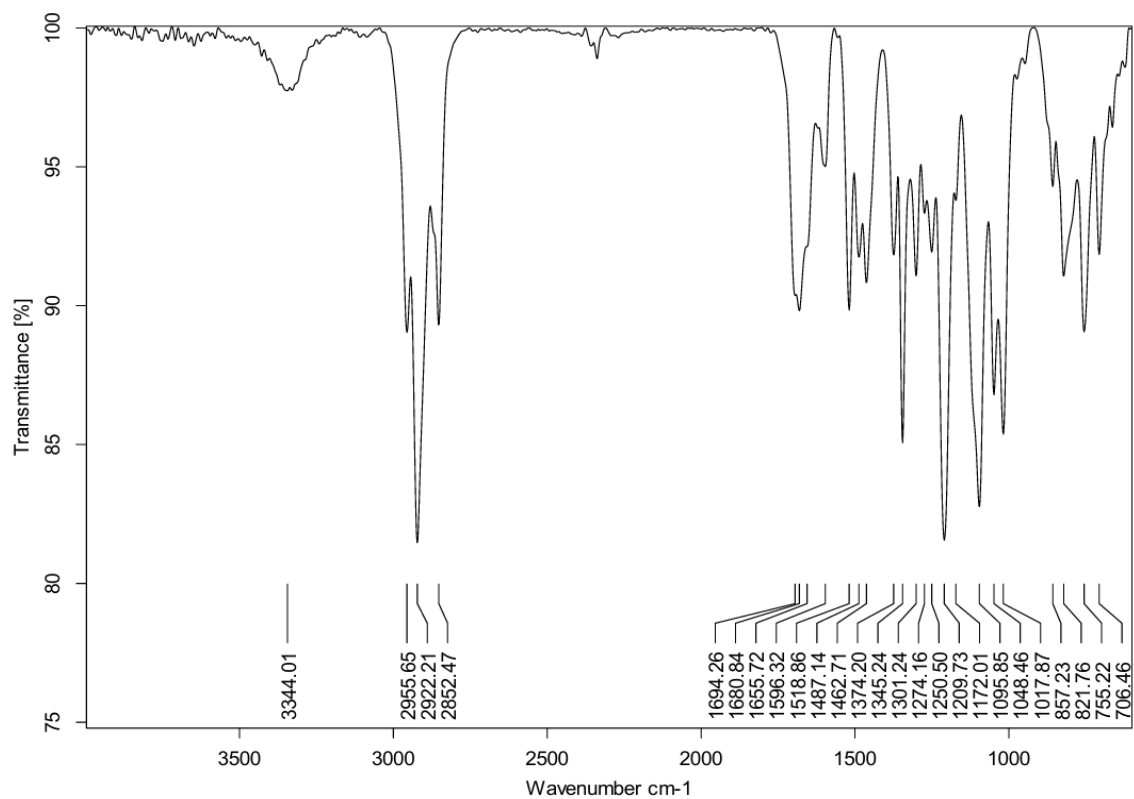

**Figure S37.** The FTIR spectrum of **6c**.

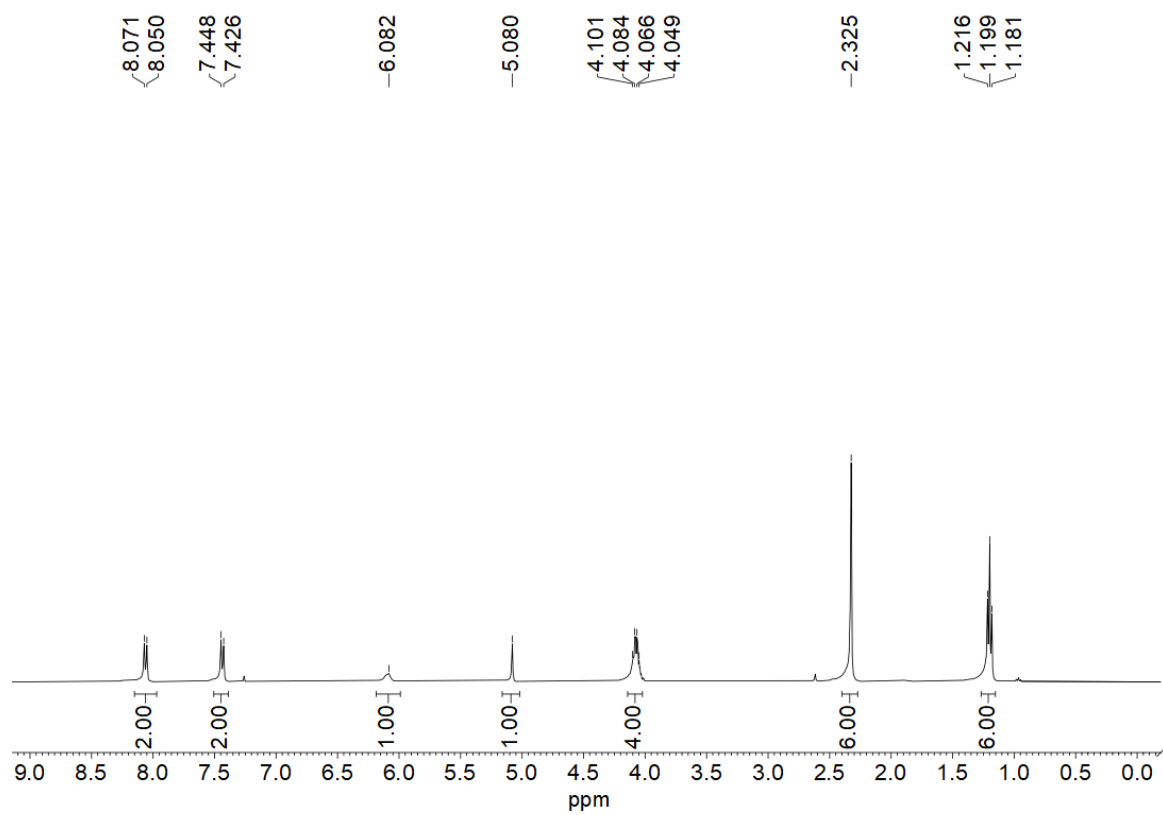

**Figure S38.** The <sup>1</sup>H-NMR spectrum of **6c**.



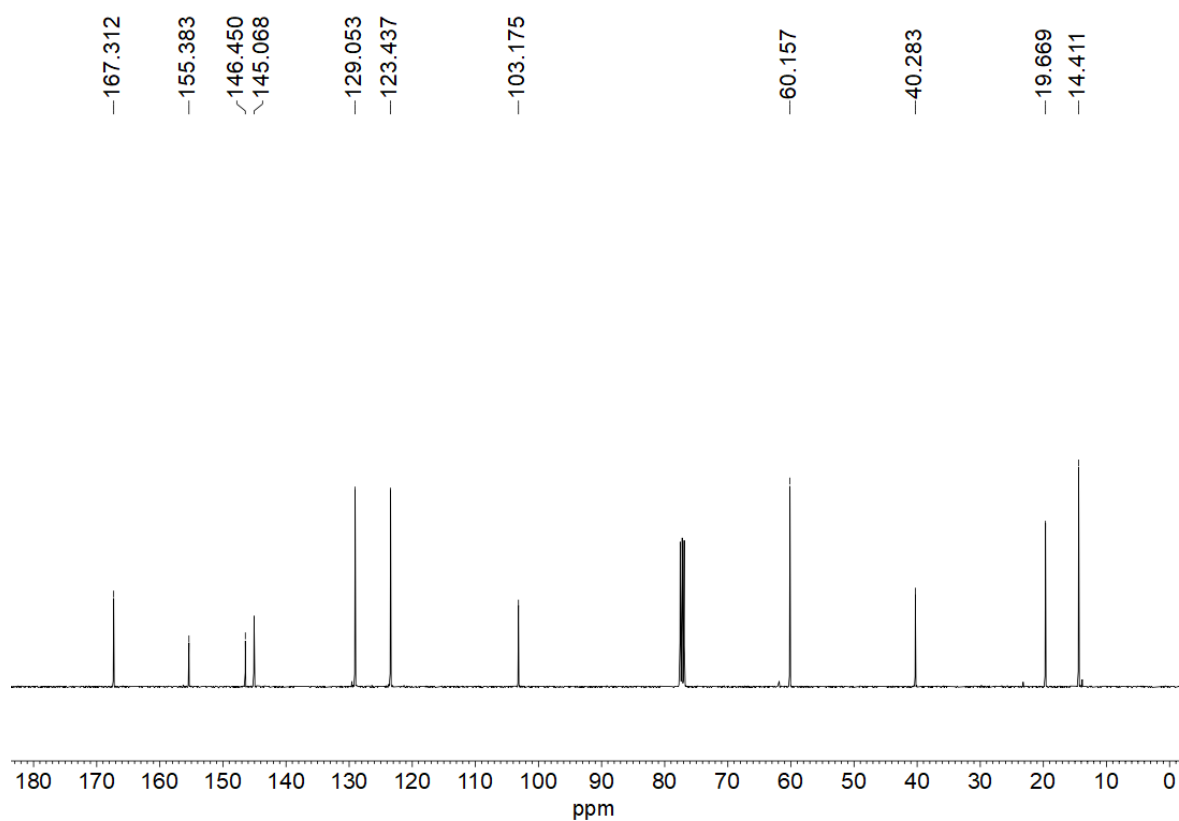

**Figure S39.** The  $^{13}\text{C}$ -NMR spectrum of **6c**.

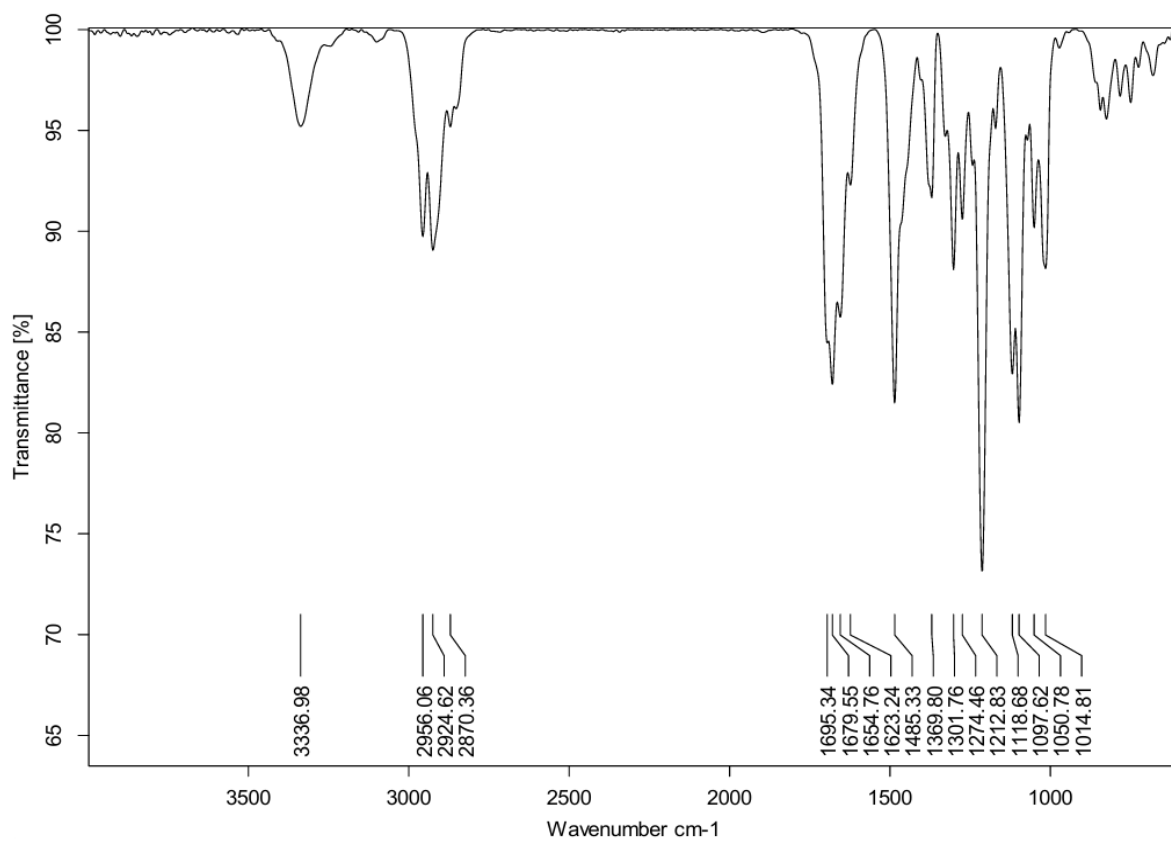

**Figure S40.** The FTIR spectrum of **6d**.

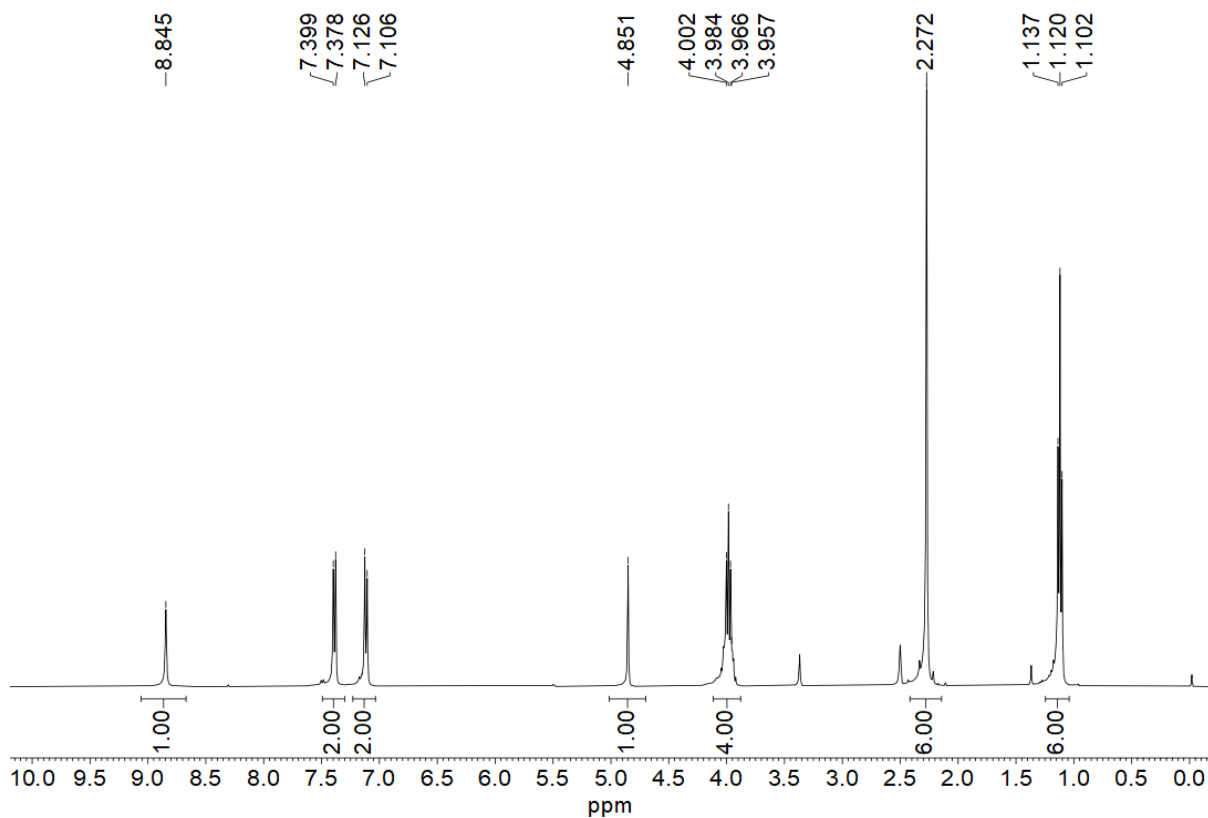

**Figure S41.** The  $^1\text{H}$ -NMR spectrum of **6d**.

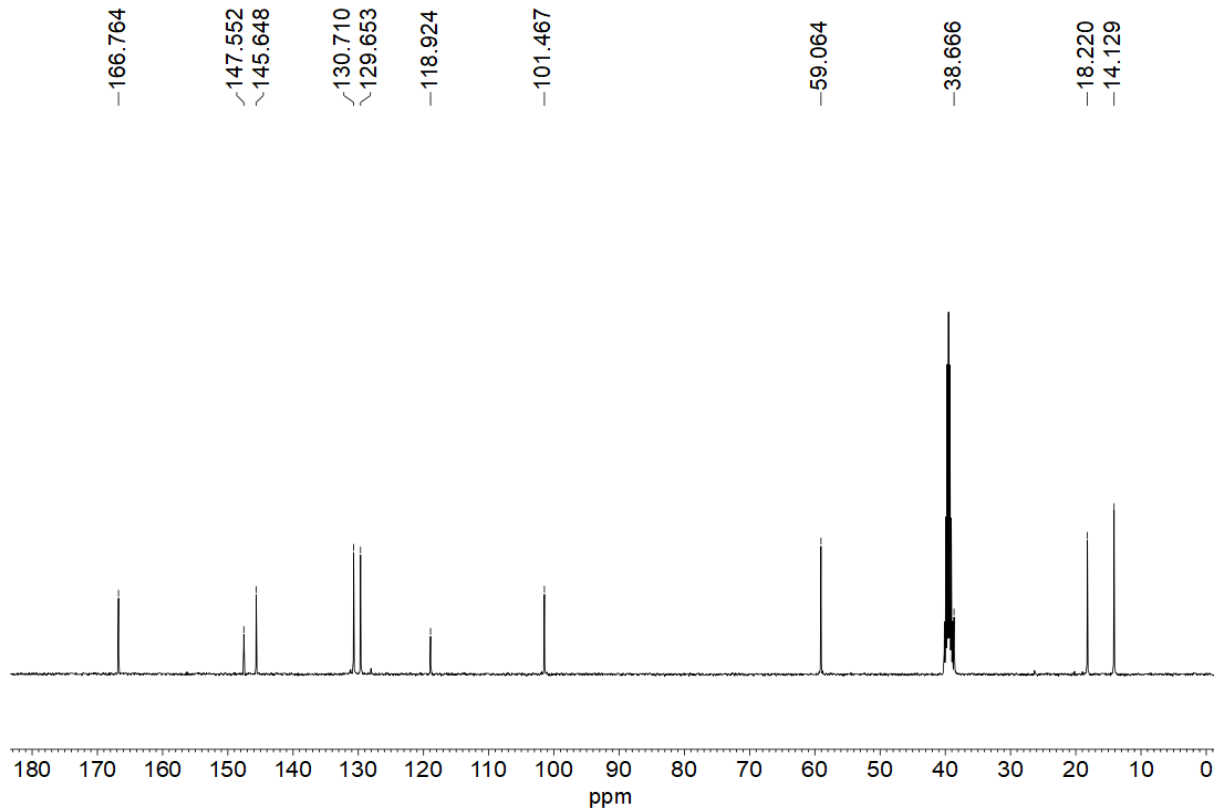

**Figure S42.** The  $^{13}\text{C}$ -NMR spectrum of **6d**.

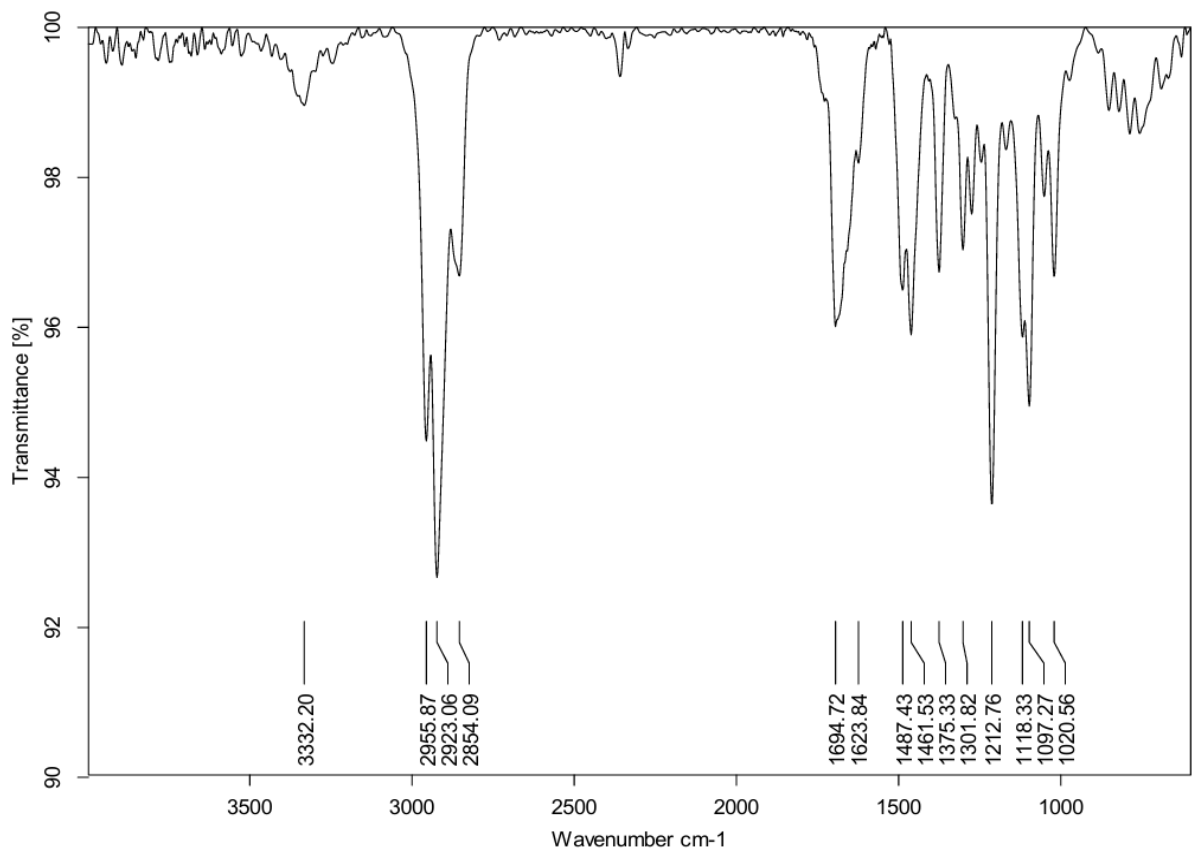

**Figure S43.** The FTIR spectrum of **6e**.

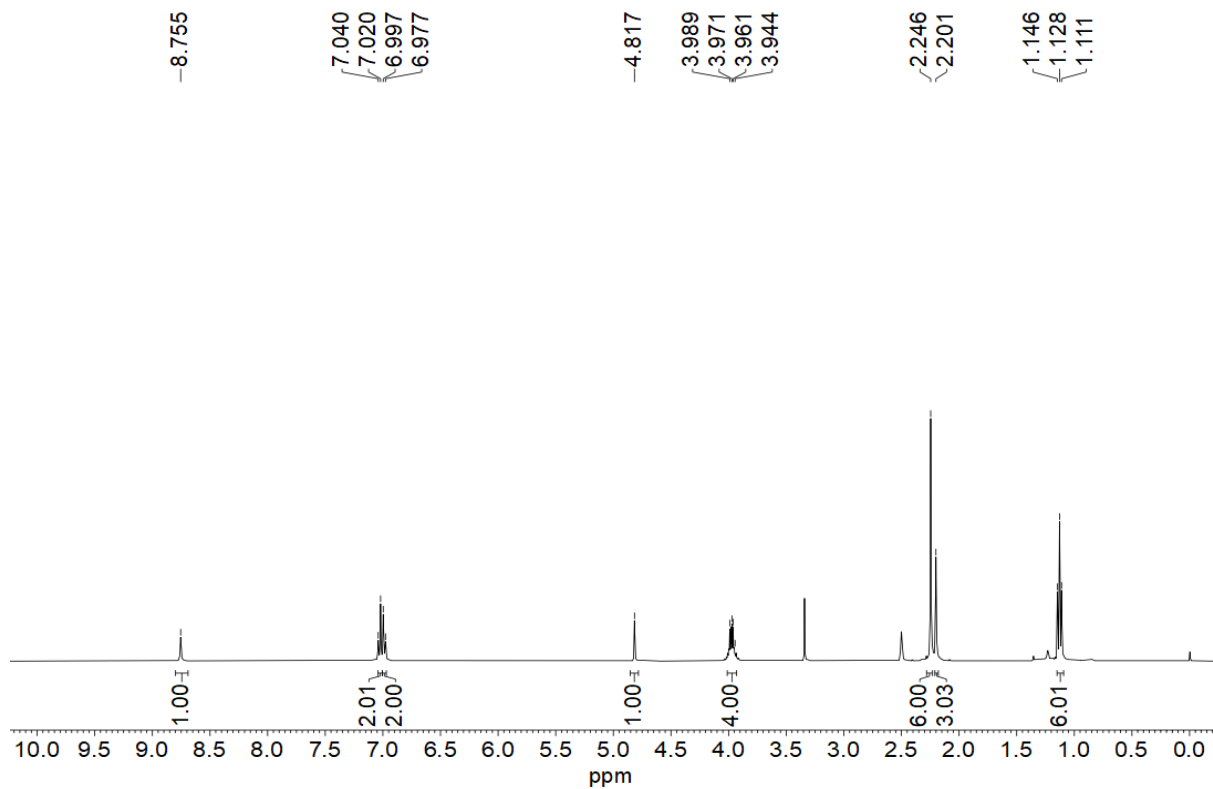

**Figure S44.** The <sup>1</sup>H-NMR spectrum of **6e**.

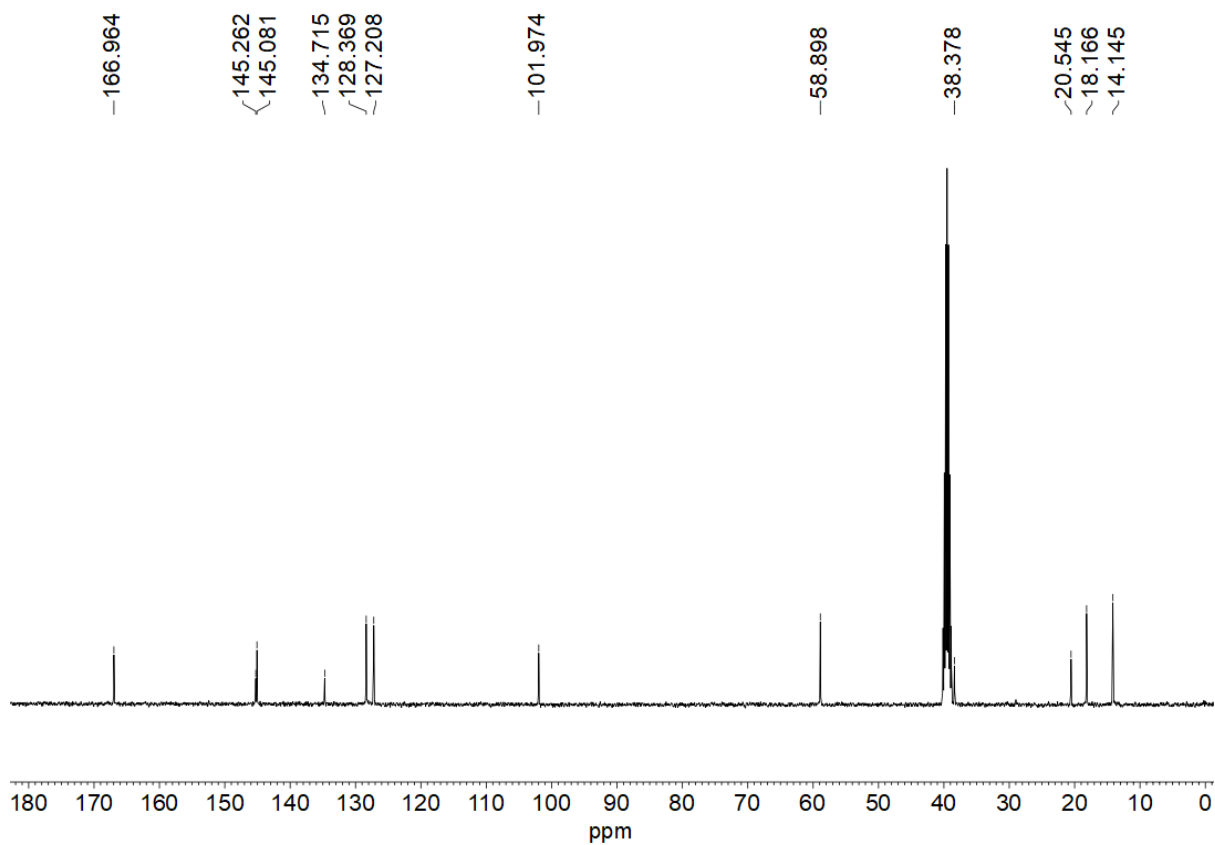

**Figure S45.** The  $^{13}\text{C}$ -NMR spectrum of **6e**.

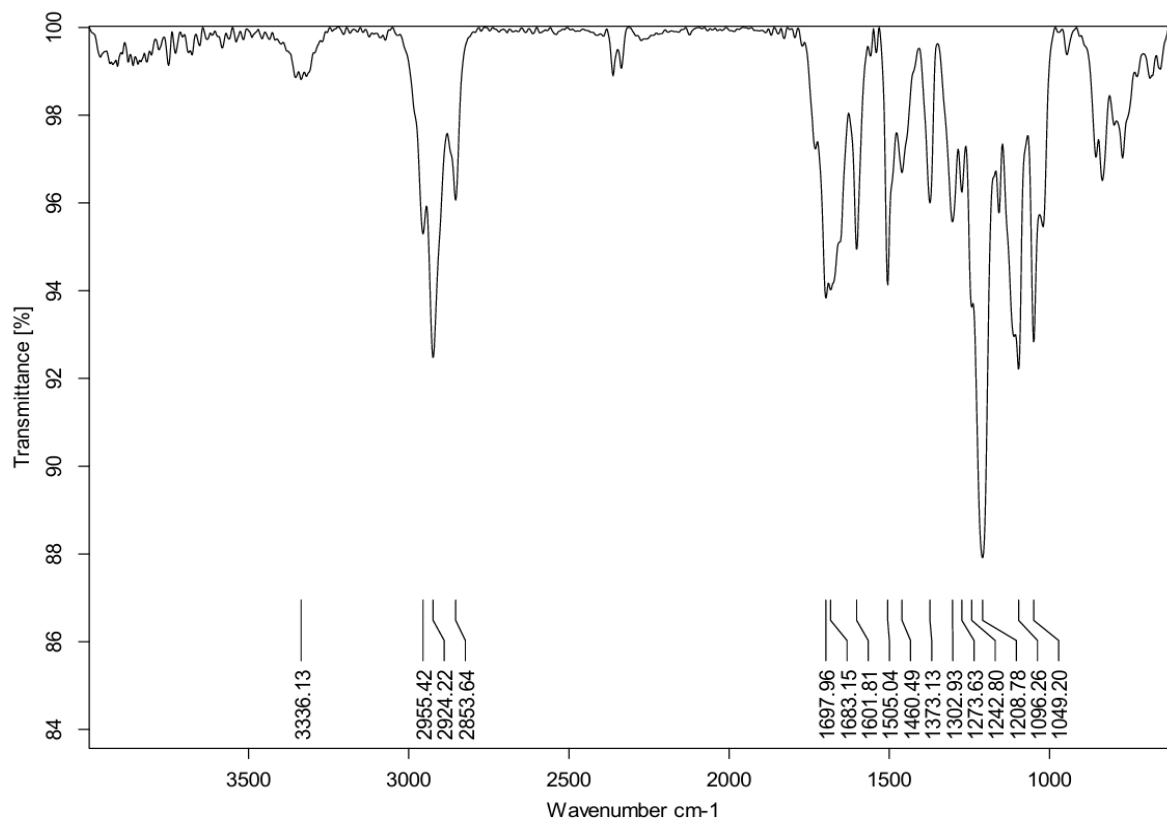

**Figure S46.** The FTIR spectrum of **6f**.

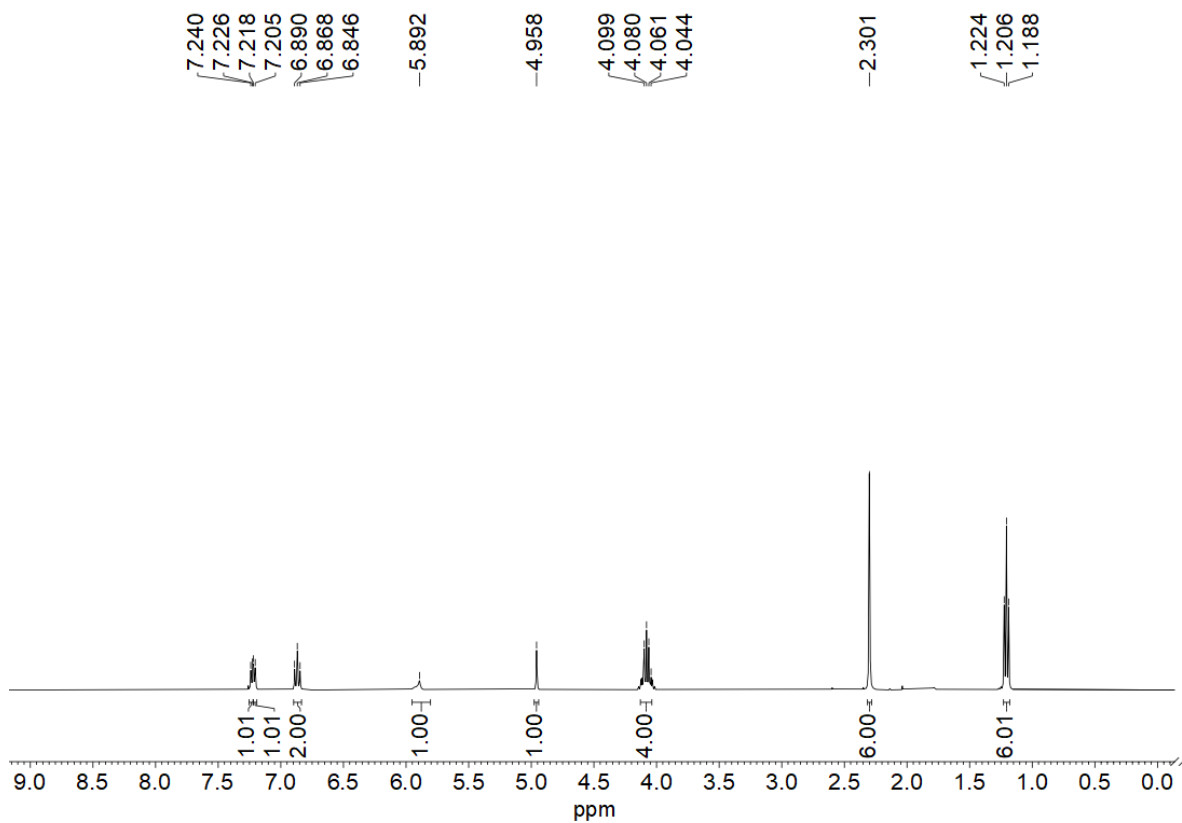

**Figure S47.** The  $^1\text{H}$ -NMR spectrum of **6f**.

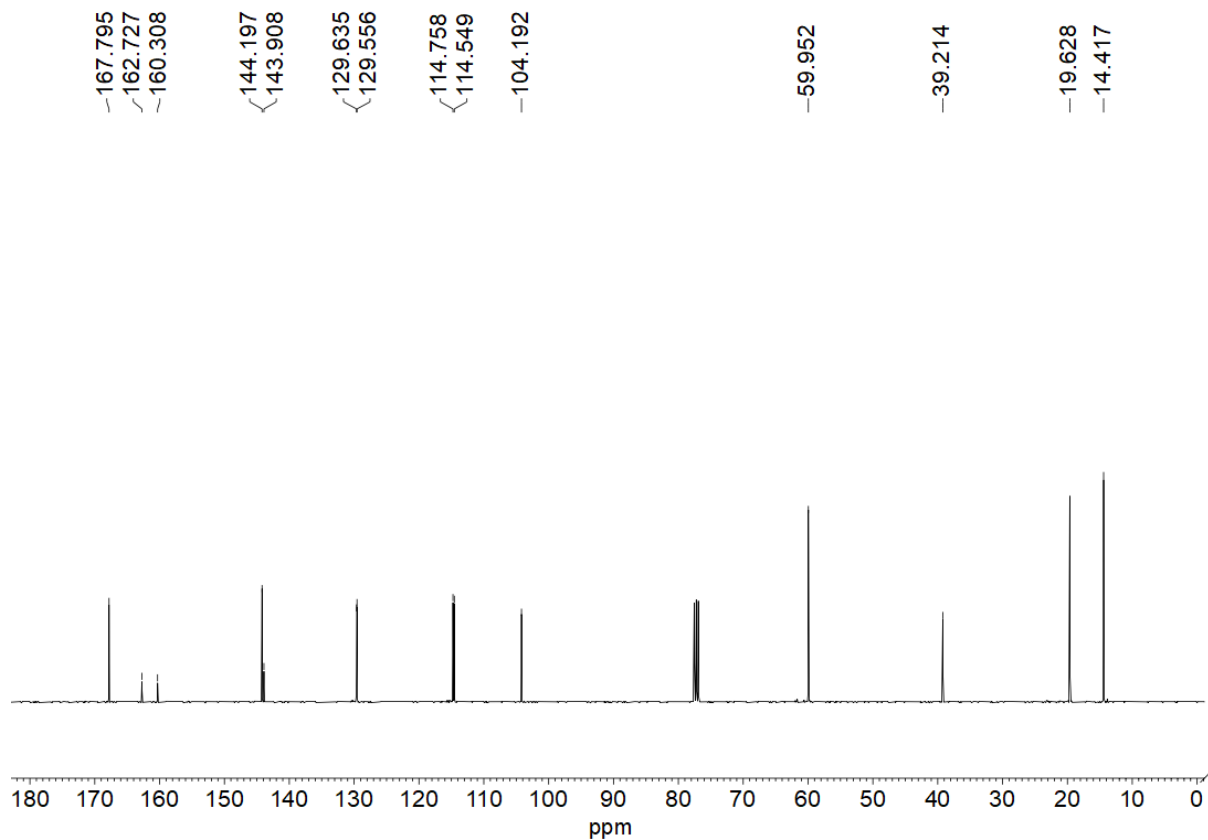

**Figure S48.** The  $^{13}\text{C}$ -NMR spectrum of **6f**.

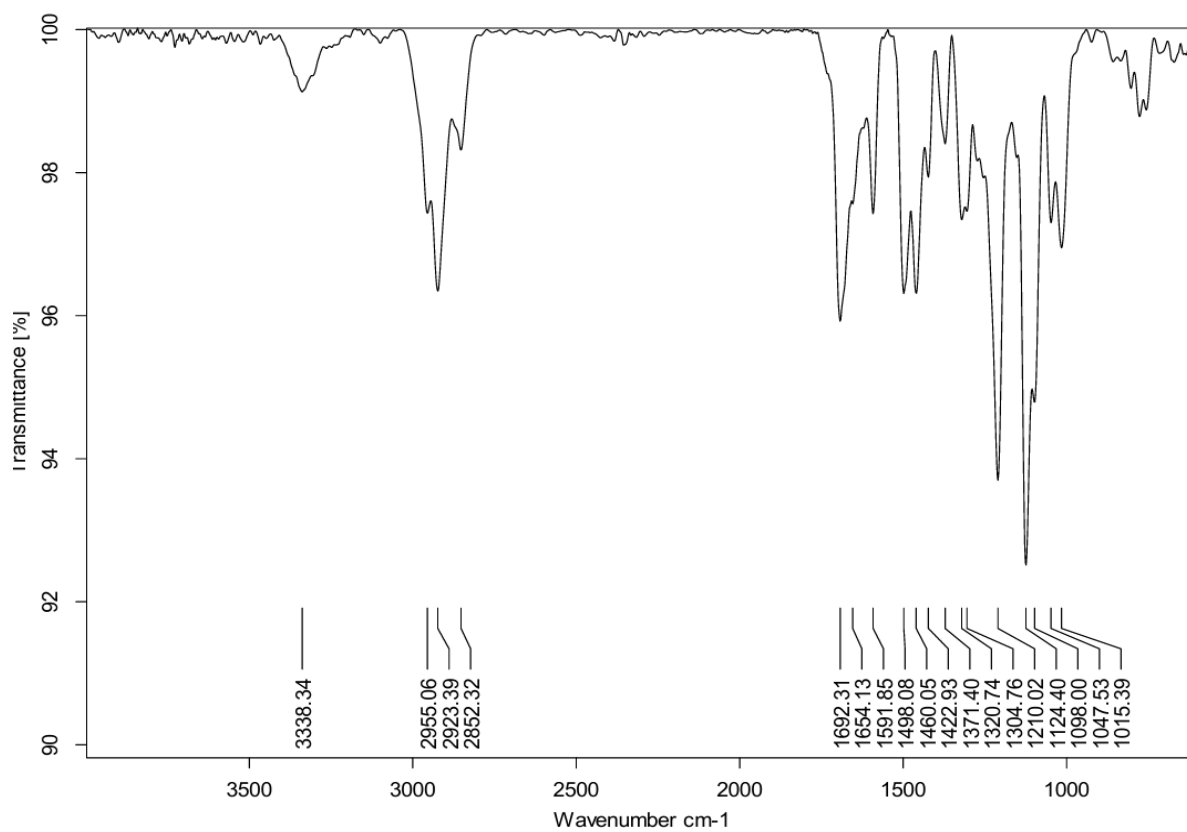

**Figure S49.** The FTIR spectrum of **6g**.

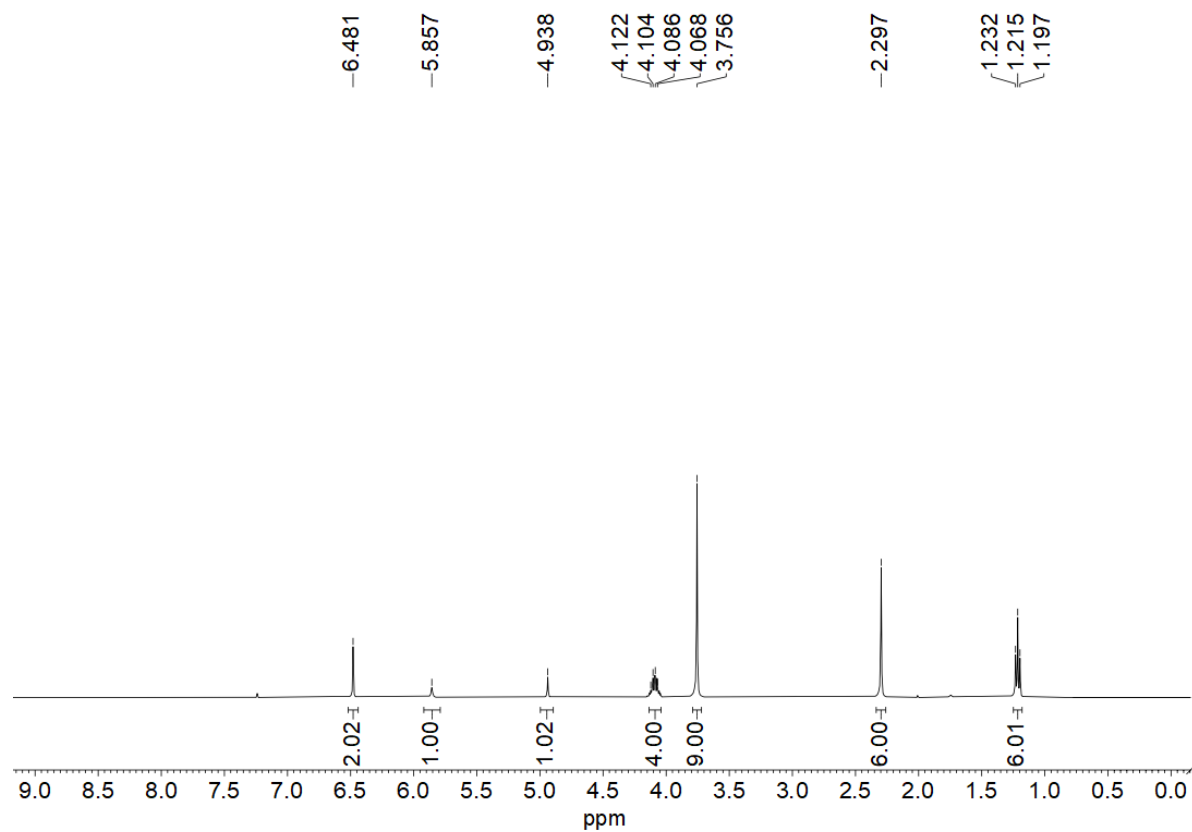

**Figure S50.** The <sup>1</sup>H-NMR spectrum of **6g**.

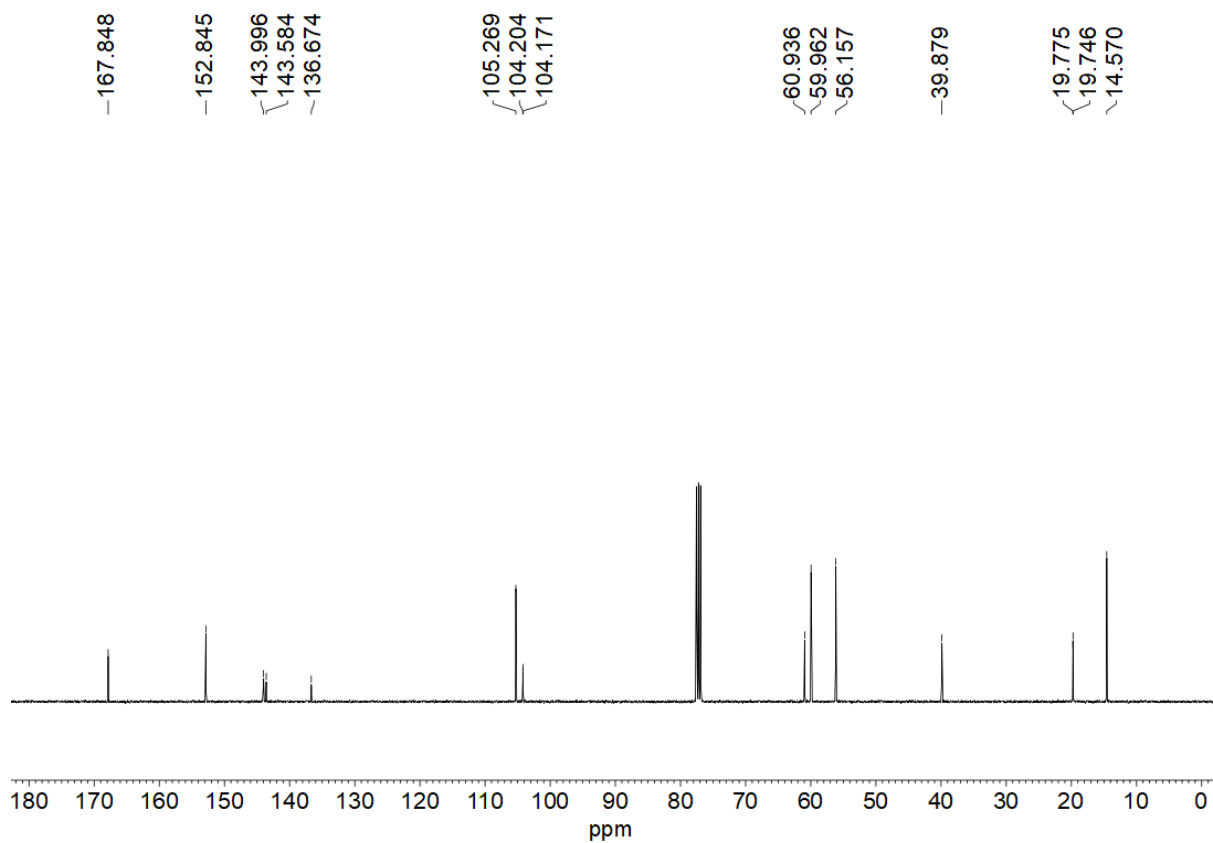

**Figure S51.** The  $^{13}\text{C}$ -NMR spectrum of **6g**.

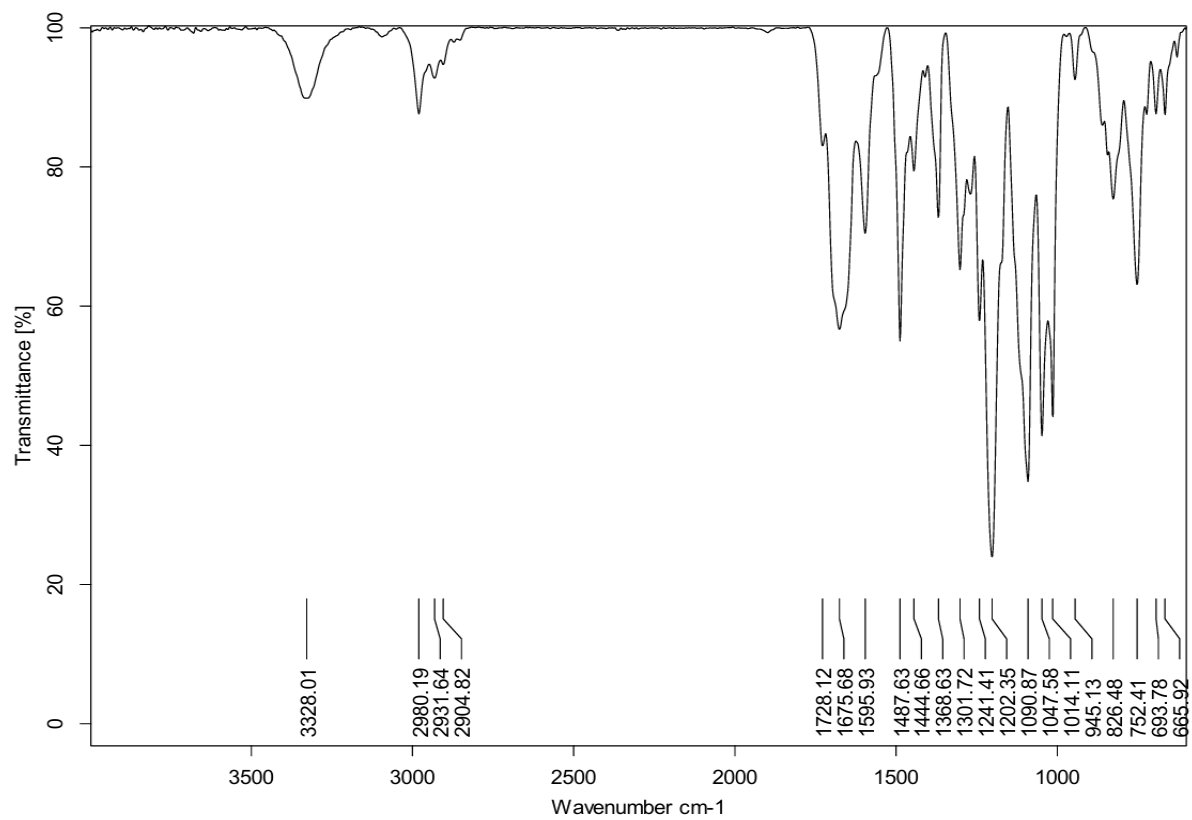

**Figure S52.** The FTIR spectrum of **6h**.

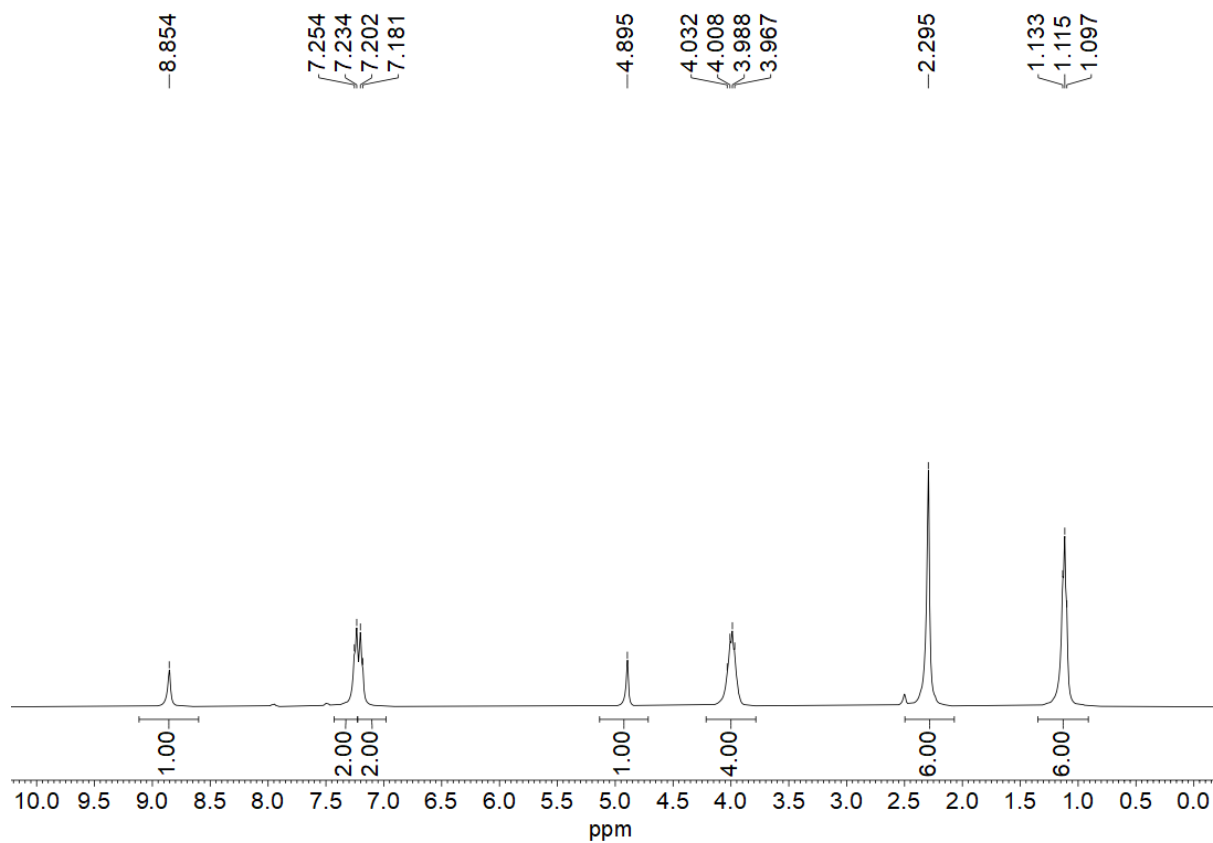

**Figure S53.** The  $^1\text{H}$ -NMR spectrum of **6h**.

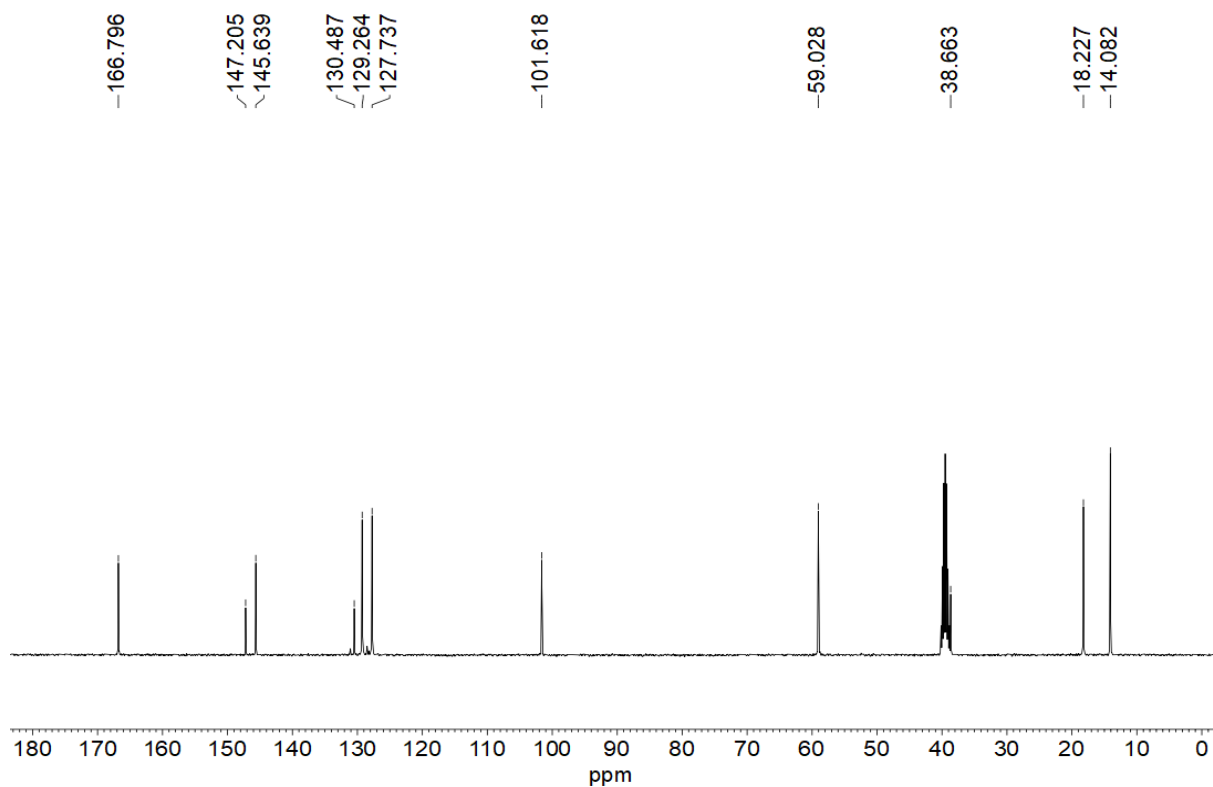

**Figure S54.** The  $^{13}\text{C}$ -NMR spectrum of **6h**.



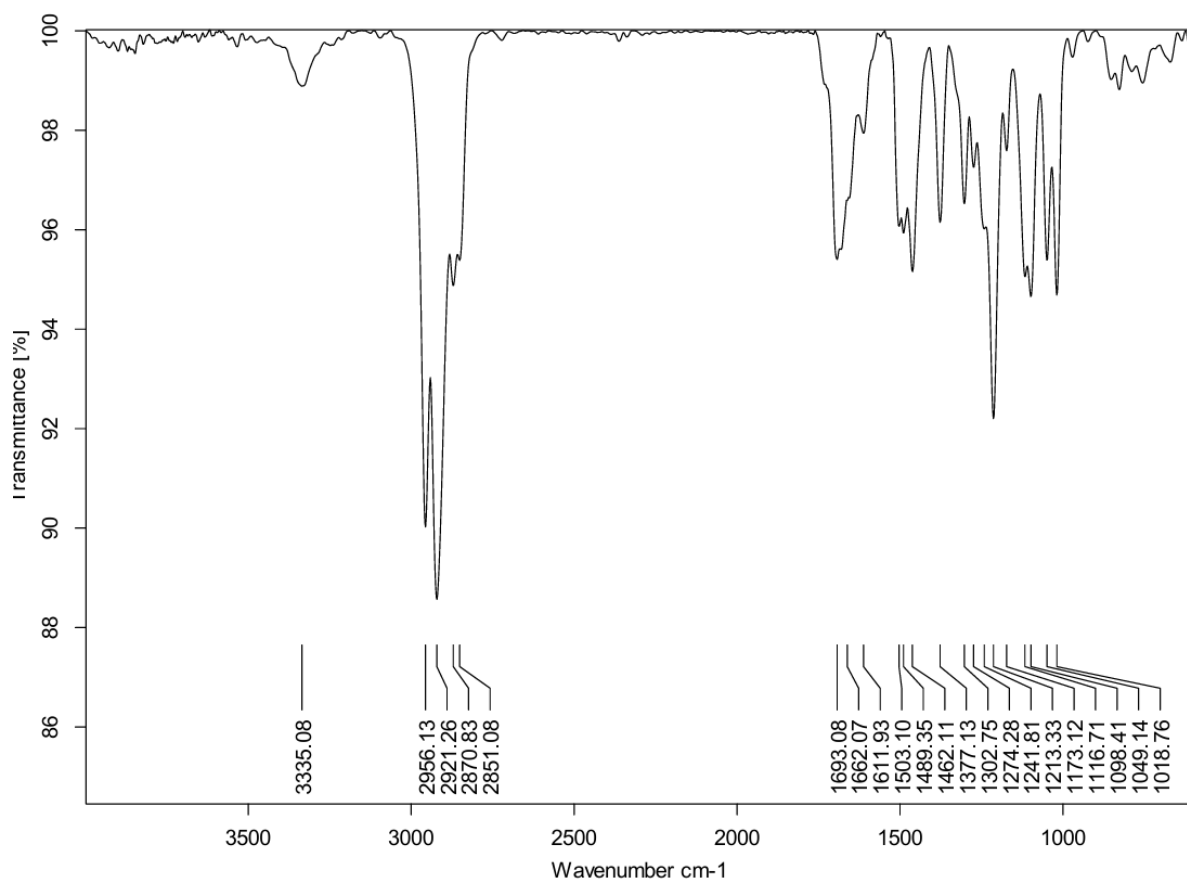

**Figure S55.** The FTIR spectrum of **6i**.

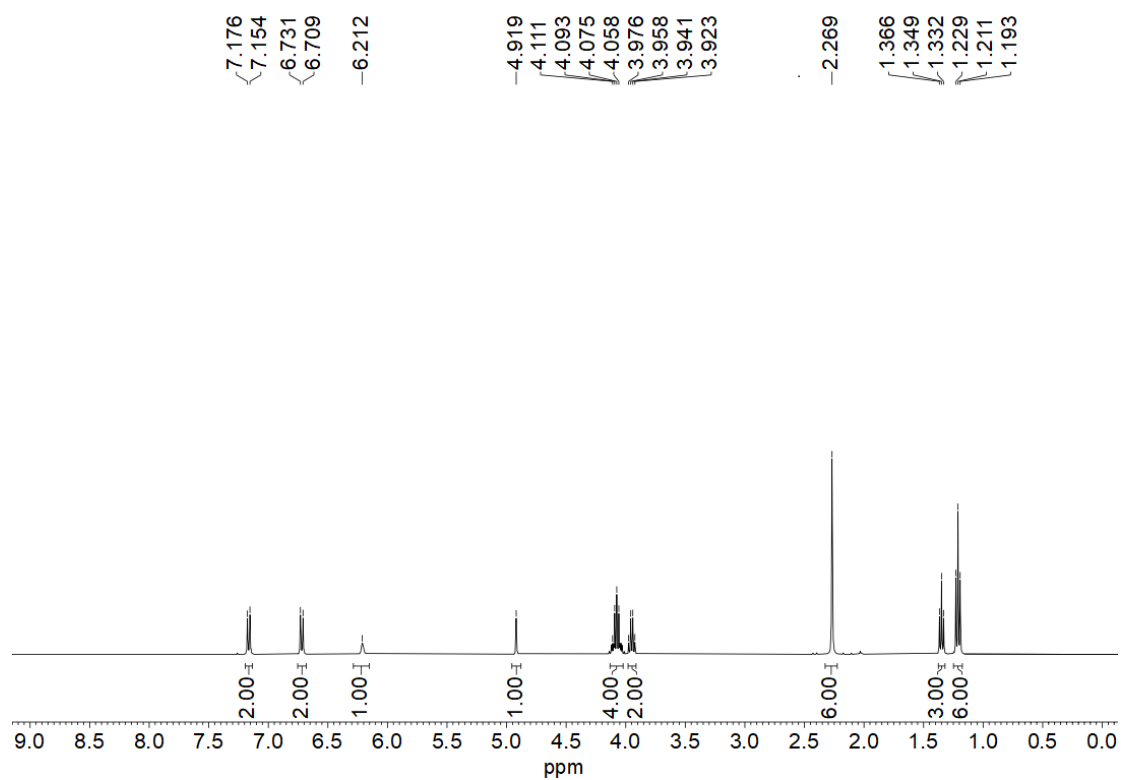

**Figure S56.** The <sup>1</sup>H-NMR spectrum of **6i**.

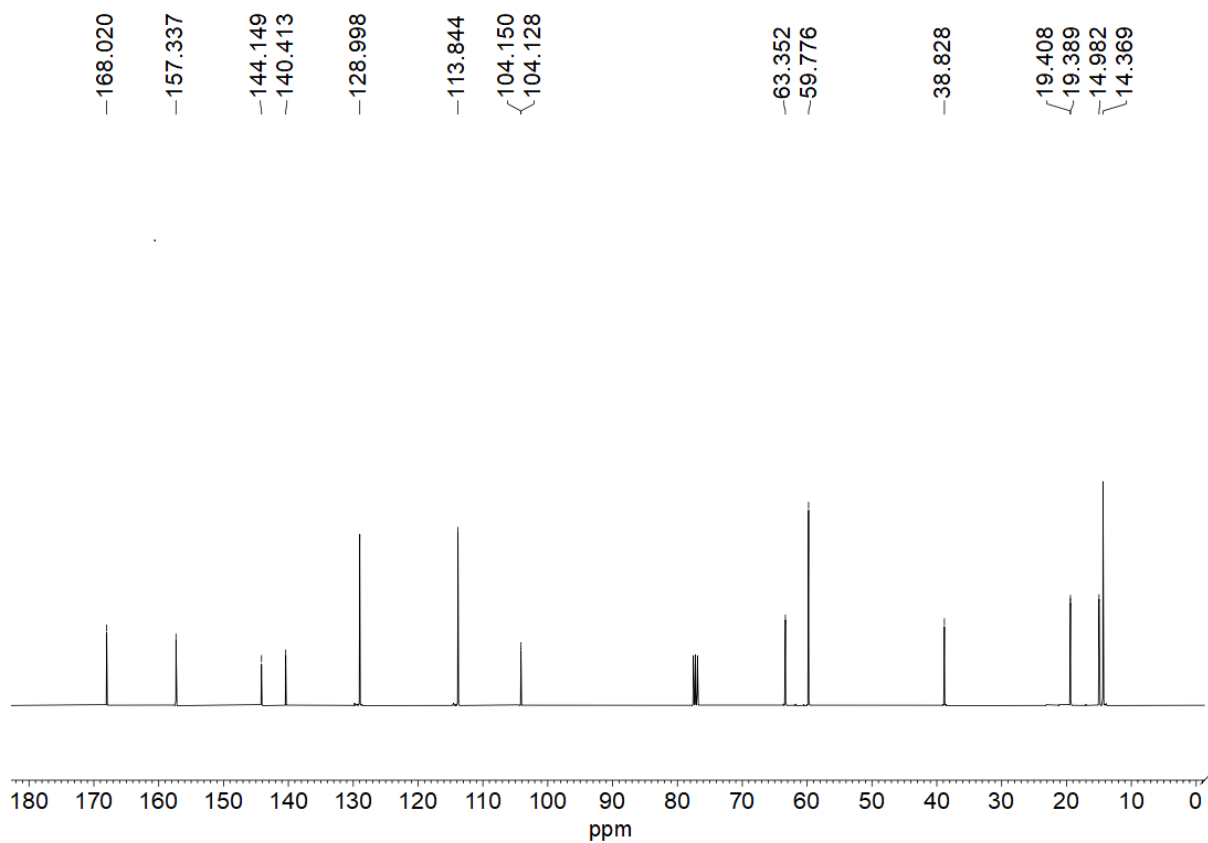

**Figure S57.** The  $^{13}\text{C}$ -NMR spectrum of **6i**.

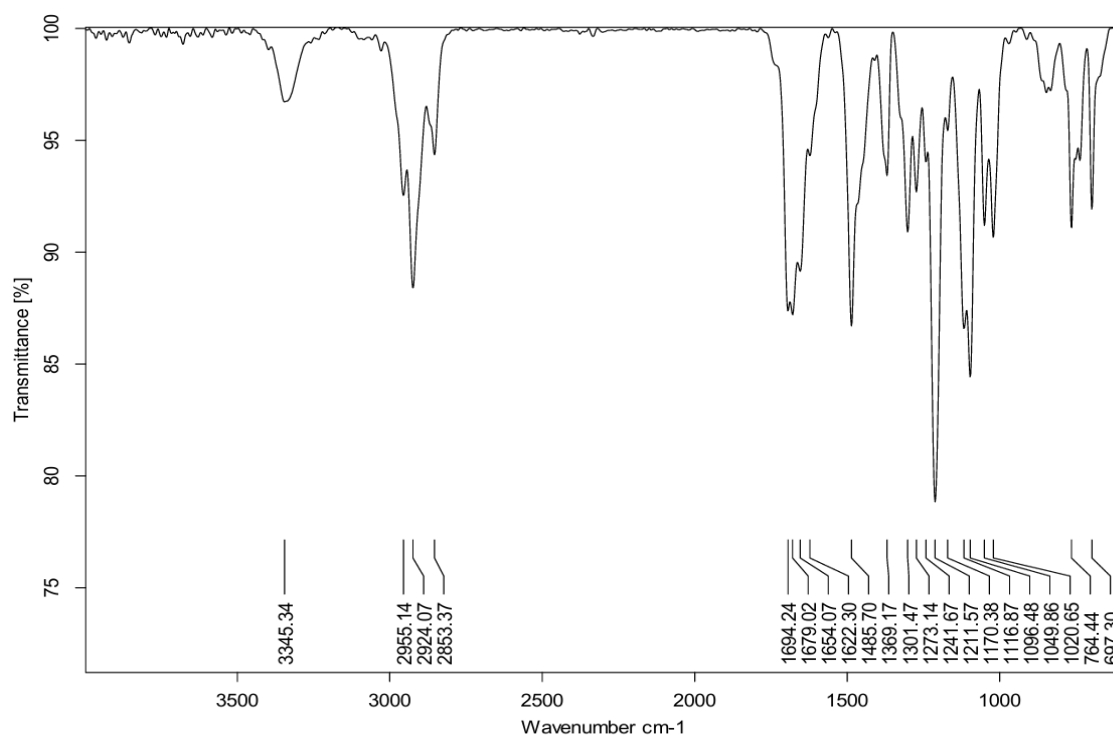

**Figure S58.** The FTIR spectrum of **6j**.

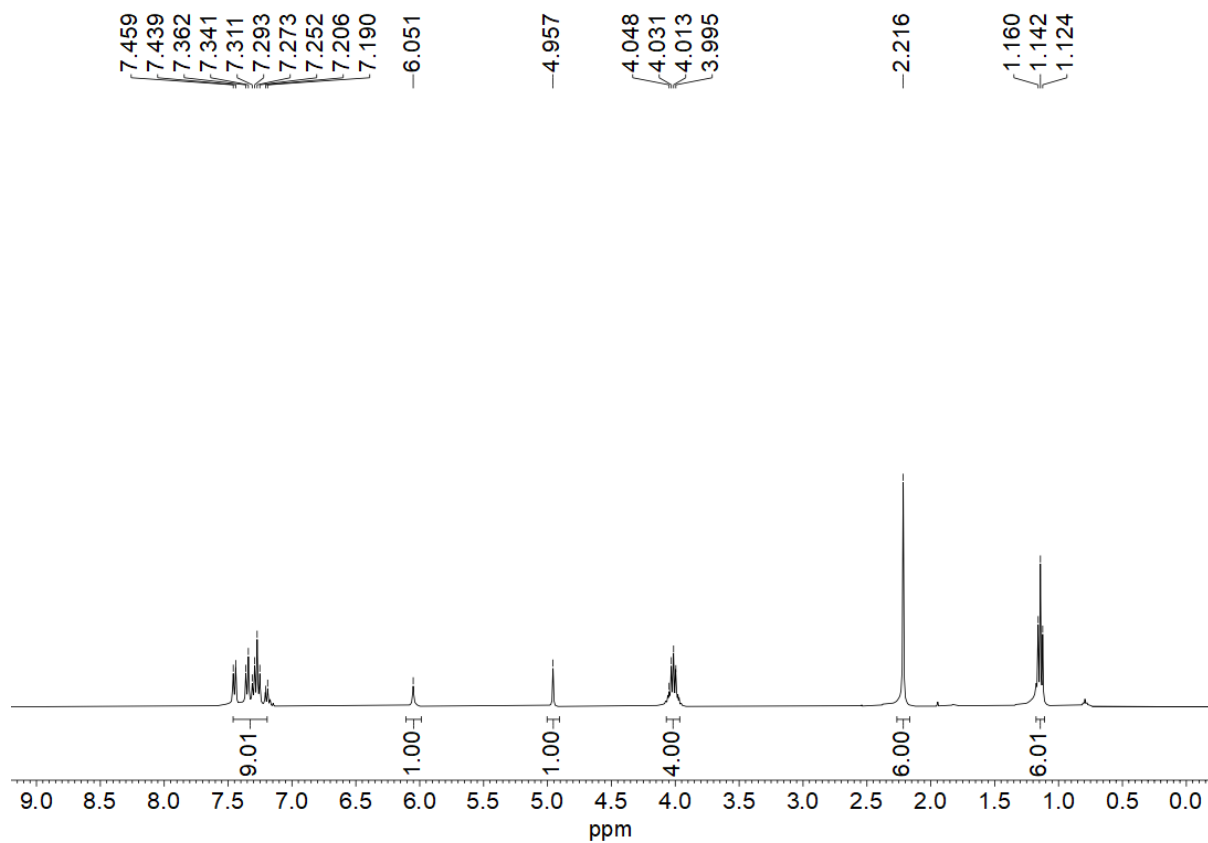

**Figure S59.** The  $^1\text{H}$ -NMR spectrum of **6j**.

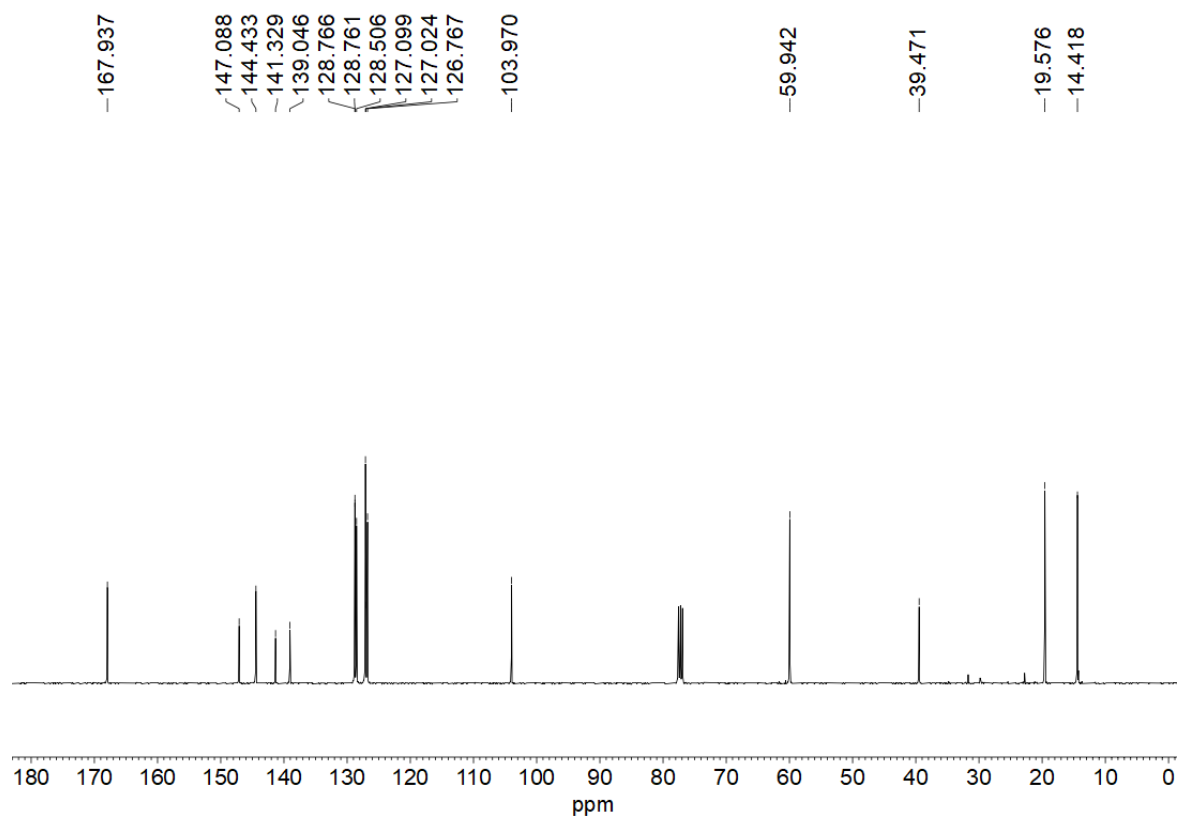

**Figure S60.** The  $^{13}\text{C}$ -NMR spectrum of **6j**.

## Characterization data of substituted pyridines by oxidizing 1,4-dihydropyridines (DHPs):

Diethyl 2,6-dimethyl-4-phenylpyridine-3,5-dicarboxylate (**7a**):<sup>8,9</sup> Light yellow solid (0.486 g, 98%), Melting point: 61 °C, <sup>1</sup>H-NMR (400 MHz, CDCl<sub>3</sub>, δ ppm): 7.35-7.21 (m, 5H), 3.97 (q, 4H, *J* = 7.2 Hz), 2.58 (s, 6H), 0.87 (t, 6H, *J* = 7.2 Hz); <sup>13</sup>C-NMR (100 MHz, CDCl<sub>3</sub>, δ ppm): 168.0, 155.6, 146.3, 136.7, 128.6, 128.2, 127.1, 61.5, 23.0, 13.7; FTIR (ATR, cm<sup>-1</sup>): 2982, 1722, 1557, 1231, 1103, 1041.

Diethyl 4-(4-methoxyphenyl)-2,6-dimethylpyridine-3,5-dicarboxylate (**7b**):<sup>8,9</sup> Light yellow solid (0.482 g, 97%), Melting point: 57 °C, <sup>1</sup>H-NMR (400 MHz, CDCl<sub>3</sub>, δ ppm): 7.11 (d, 2H, *J* = 8.8 Hz), 6.82 (d, 2H, *J* = 8.8 Hz), 3.97 (q, 4H, *J* = 7.2 Hz), 3.72 (s, 3H), 2.51 (s, 6H), 0.90 (t, 6H, *J* = 7.2 Hz); <sup>13</sup>C-NMR (100 MHz, CDCl<sub>3</sub>, δ ppm): 168.0, 159.9, 155.1, 145.9, 129.4, 128.6, 127.3, 113.6, 61.3, 55.2, 22.7, 13.7; FTIR (ATR, cm<sup>-1</sup>): 2982, 1720, 1556, 1230, 1103, 1034.

Diethyl 2,6-dimethyl-4-(4-nitrophenyl)pyridine-3,5-dicarboxylate (**7c**):<sup>8</sup> Light yellow solid (0.482 g, 97%), Melting point: 114 °C, <sup>1</sup>H-NMR (400 MHz, CDCl<sub>3</sub>, δ ppm): 8.19 (d, 2H, *J* = 8.4 Hz), 7.40 (d, 2H, *J* = 8.4 Hz), 3.97 (q, 4H, *J* = 7.2 Hz), 2.55 (s, 6H), 0.90 (t, 6H, *J* = 7.2 Hz); <sup>13</sup>C-NMR (100 MHz, CDCl<sub>3</sub>, δ ppm): 167.1, 156.1, 147.9, 144.0, 143.3, 129.5, 126.3, 123.2, 61.7, 23.1, 13.7; FTIR (ATR, cm<sup>-1</sup>): 2982, 1720, 1556, 1227, 1102, 1038.

Diethyl 4-(4-bromophenyl)-2,6-dimethylpyridine-3,5-dicarboxylate (**7d**):<sup>9</sup> Light yellow solid (0.487 g, 98%), Melting point: 51 °C, <sup>1</sup>H-NMR (400 MHz, CDCl<sub>3</sub>, δ ppm): 7.49 (d, 2H, *J* = 8.4 Hz), 7.11 (d, 2H, *J* = 8.4 Hz), 4.01 (q, 4H, *J* = 7.2 Hz), 2.57 (s, 6H), 0.95 (t, 6H, *J* = 7.2 Hz); <sup>13</sup>C-NMR (100 MHz, CDCl<sub>3</sub>, δ ppm): 167.7, 155.8, 145.0, 135.6, 131.4, 130.0, 126.9, 123.0, 61.6, 23.1, 13.8; FTIR (ATR, cm<sup>-1</sup>): 2981, 1720, 1555, 1228, 1101, 1039.

Diethyl 2,6-dimethyl-4-(p-tolyl)pyridine-3,5-dicarboxylate (**7e**):<sup>8,9</sup> Light yellow solid (0.477 g, 96%), Melting point: 72 °C, <sup>1</sup>H-NMR (400 MHz, CDCl<sub>3</sub>, δ ppm): 7.10 (d, 2H, *J* = 8.4 Hz), 7.07 (d, 2H, *J* = 8.4 Hz), 3.96 (q, 4H, *J* = 7.2 Hz), 2.53 (s, 6H), 2.29 (s, 3H), 0.88 (t, 6H, *J* = 7.2 Hz); <sup>13</sup>C-NMR (100 MHz, CDCl<sub>3</sub>, δ ppm): 168.0, 155.2, 146.2, 138.3, 133.6, 128.8, 128.7, 128.0, 127.1, 61.3, 22.8, 21.2, 13.6; FTIR (ATR, cm<sup>-1</sup>): 2981, 1720, 1555, 1229, 1102, 1039.

Diethyl 4-(4-fluorophenyl)-2,6-dimethylpyridine-3,5-dicarboxylate (**7f**):<sup>8,9</sup> Light yellow oil (0.482 g, 97%), <sup>1</sup>H-NMR (400 MHz, CDCl<sub>3</sub>, δ ppm): 7.23 (d, 1H, *J* = 8.4 Hz), 7.20 (d, 1H, *J*

= 8.8 Hz), 7.05 (d, 1H,  $J = 8.8$  Hz), 7.03 (d, 1H,  $J = 8.4$ ), 4.01 (q, 4H,  $J = 7.2$  Hz), 2.57 (s, 6H), 0.94 (t, 6H,  $J = 7.2$  Hz);  $^{13}\text{C}$ -NMR (100 MHz,  $\text{CDCl}_3$ ,  $\delta$  ppm): 167.9, 164.2, 161.7, 155.6, 145.1, 132.5, 130.3, 130.2, 127.2, 115.4, 115.2, 61.6, 23.0, 13.8; FTIR (ATR,  $\text{cm}^{-1}$ ): 2983, 1720, 1557, 1226, 1101, 1039.

Diethyl 2,6-dimethyl-4-(3,4,5-trimethoxyphenyl)pyridine-3,5-dicarboxylate (**7g**):<sup>8</sup> Light yellow solid (0.467 g, 94%), Melting point: 105 °C.,  $^1\text{H}$ -NMR (400 MHz,  $\text{CDCl}_3$ ,  $\delta$  ppm): 6.47 (s, 2H), 4.04 (q, 4H,  $J = 7.2$  Hz), 3.82 (s, 3H), 3.79 (s, 6H), 2.56 (s, 6H), 0.96 (t, 6H,  $J = 7.2$  Hz);  $^{13}\text{C}$ -NMR (100 MHz,  $\text{CDCl}_3$ ,  $\delta$  ppm): 168.2, 155.5, 153.1, 145.9, 138.3, 132.1, 127.0, 105.7, 61.1, 61.1, 56.3, 23.0, 13.9; FTIR (ATR,  $\text{cm}^{-1}$ ): 2973, 1720, 1554, 1228, 1103, 1044.

Diethyl 4-(4-chlorophenyl)-2,6-dimethylpyridine-3,5-dicarboxylate (**7h**):<sup>9</sup> Light yellow solid (0.472 g, 95%), Melting point: 70 °C,  $^1\text{H}$ -NMR (400 MHz,  $\text{CDCl}_3$ ,  $\delta$  ppm): 7.33 (d, 2H,  $J = 8.4$  Hz), 7.17 (d, 2H,  $J = 8.4$  Hz), 4.01 (q, 4H,  $J = 7.2$  Hz), 2.57 (s, 6H), 0.95 (t, 6H,  $J = 7.2$  Hz);  $^{13}\text{C}$ -NMR (100 MHz,  $\text{CDCl}_3$ ,  $\delta$  ppm): 167.7, 155.7, 145.0, 135.1, 134.8, 129.7, 128.5, 126.9, 61.6, 23.0, 13.8; FTIR (ATR,  $\text{cm}^{-1}$ ): 2982, 1720, 1555, 1228, 1102, 1039.

Diethyl 4-(4-ethoxyphenyl)-2,6-dimethylpyridine-3,5-dicarboxylate (**7i**):<sup>10</sup> Light yellow oil (0.477 g, 96%),  $^1\text{H}$ -NMR (400 MHz,  $\text{CDCl}_3$ ,  $\delta$  ppm): 7.13 (d, 2H,  $J = 8.8$  Hz), 6.84 (d, 2H,  $J = 8.8$  Hz), 4.00 (q, 6H,  $J = 7.2$  Hz), 2.54 (s, 6H), 1.37 (t, 3H,  $J = 7.2$  Hz), 0.93 (t, 6H,  $J = 7.2$  Hz);  $^{13}\text{C}$ -NMR (100 MHz,  $\text{CDCl}_3$ ,  $\delta$  ppm): 168.1, 159.2, 155.2, 145.9, 129.5, 128.6, 127.3, 114.2, 63.5, 61.4, 22.9, 14.8, 13.8; FTIR (ATR,  $\text{cm}^{-1}$ ): 2981, 1720, 1556, 1229, 1102, 1038.

Diethyl 4-([1,1'-biphenyl]-4-yl)-2,6-dimethylpyridine-3,5-dicarboxylate (**7j**):<sup>7</sup> Light yellow solid (0.472 g, 95%), Melting point: 142 °C,  $^1\text{H}$ -NMR (400 MHz,  $\text{CDCl}_3$ ,  $\delta$  ppm): 7.62-7.32 (m, 9H), 4.03 (q, 4H,  $J = 7.2$  Hz), 2.62 (s, 6H), 0.92 (t, 6H,  $J = 7.2$  Hz);  $^{13}\text{C}$ -NMR (100 MHz,  $\text{CDCl}_3$ ,  $\delta$  ppm): 168.0, 155.6, 146.0, 141.5, 140.4, 135.7, 129.0, 128.7, 127.8, 127.2, 127.1, 126.9, 61.5, 23.0, 13.7; FTIR (ATR,  $\text{cm}^{-1}$ ): 2981, 1720, 1560, 1230, 1103, 1040.

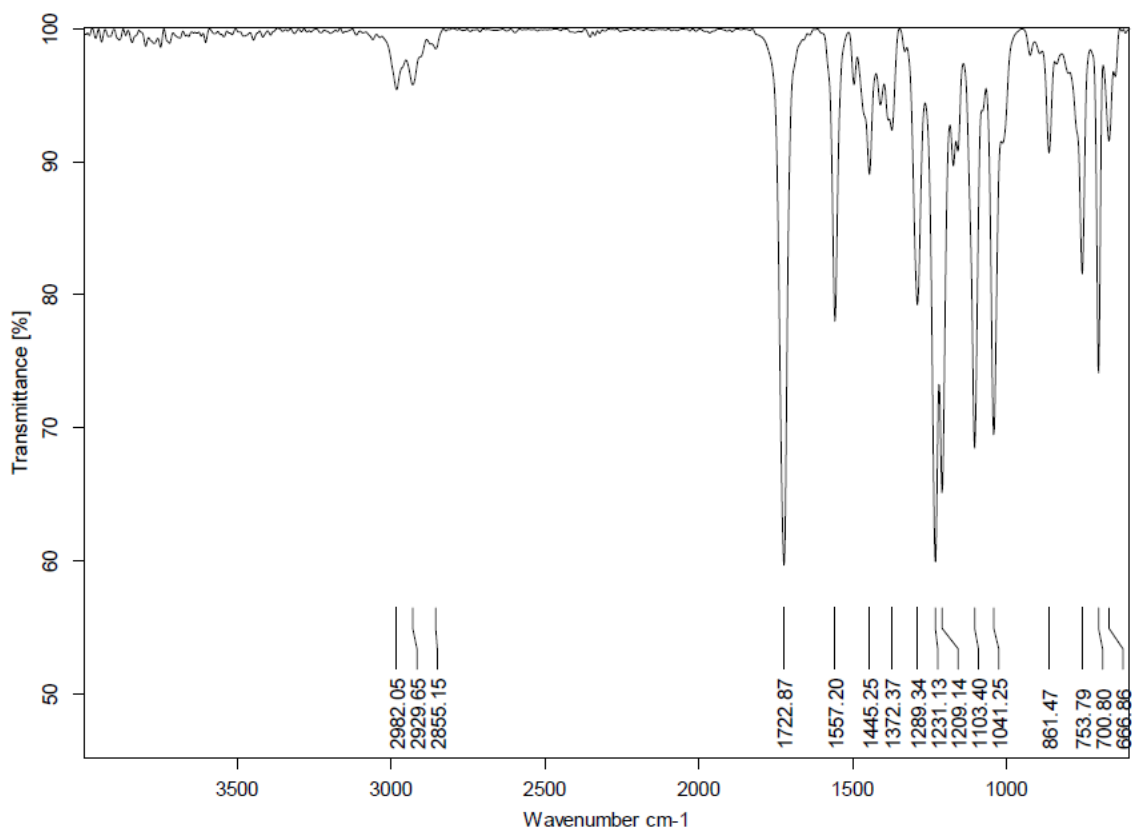

**Figure S61.** The FTIR spectrum of **7a**.

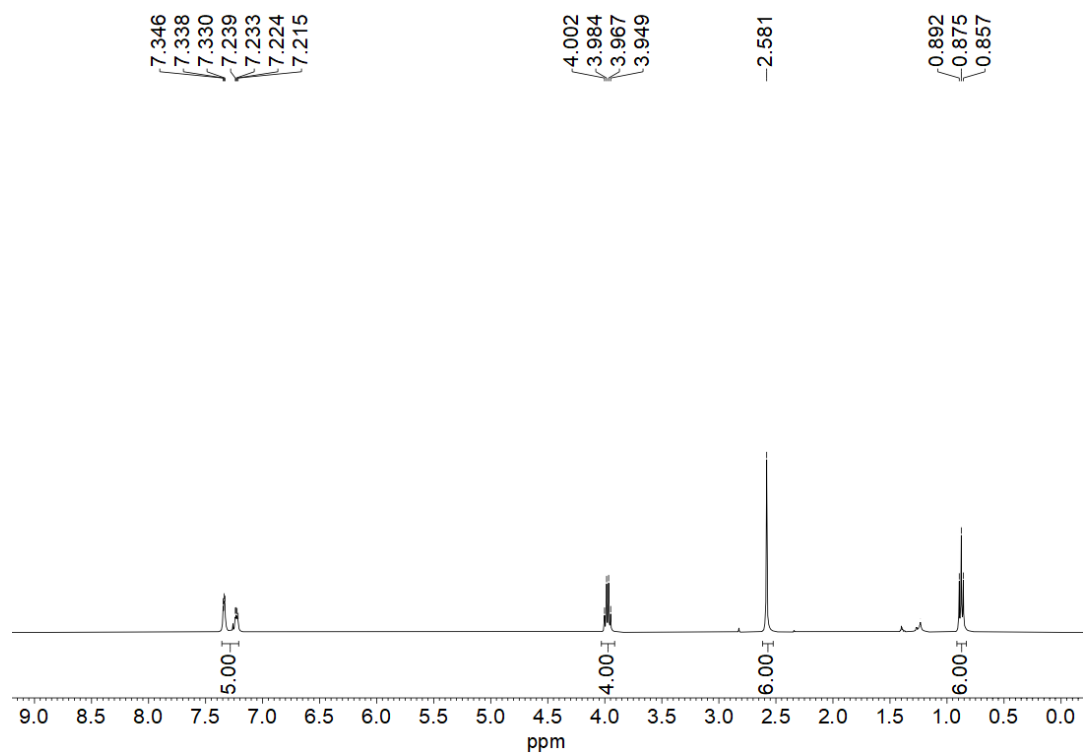

**Figure S62.** The <sup>1</sup>H-NMR spectrum of **7a**.

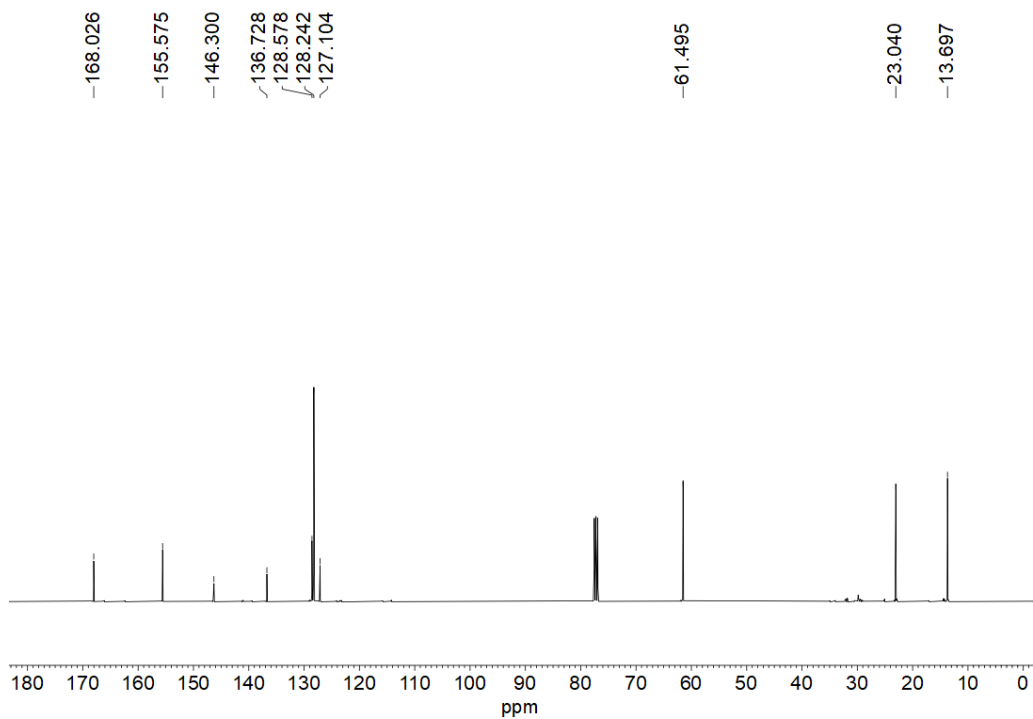

**Figure S63.** The  $^{13}\text{C}$ -NMR spectrum of 7a.

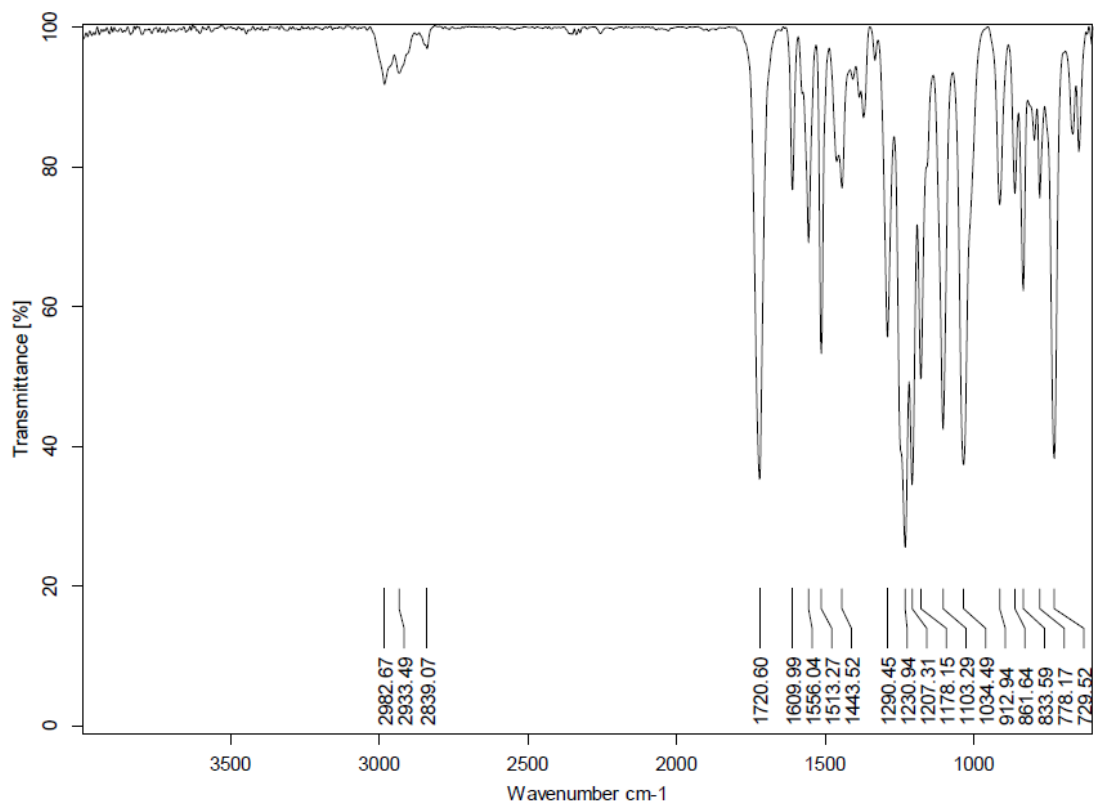

**Figure S64.** The FTIR spectrum of 7b.

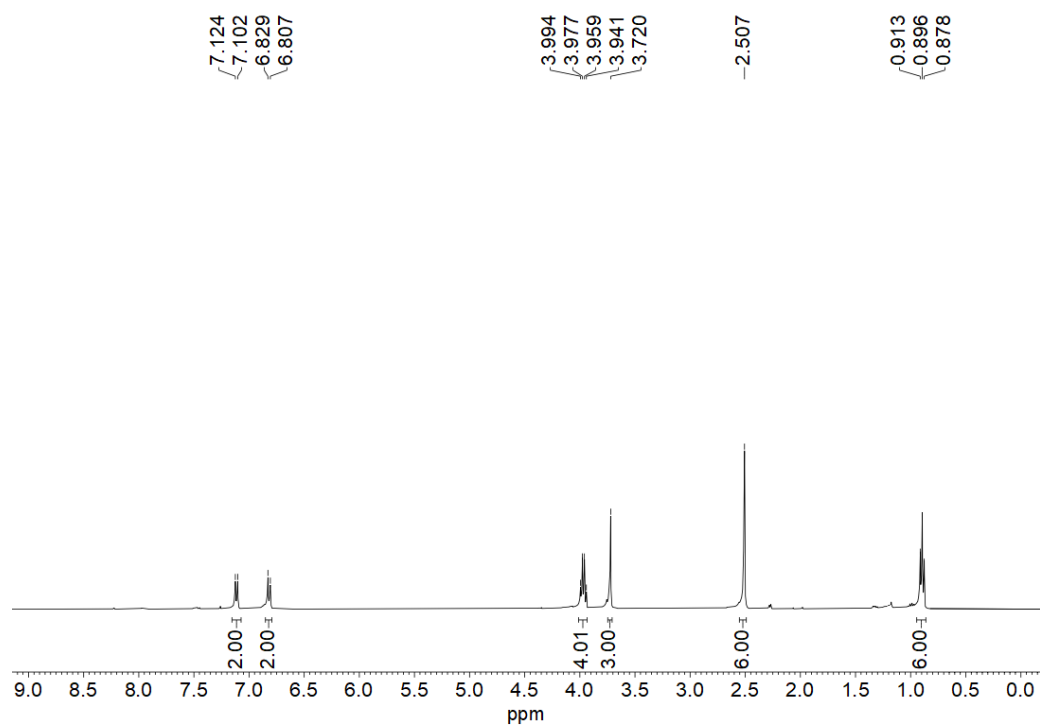

**Figure S65.** The  $^1\text{H}$ -NMR spectrum of **7b**.

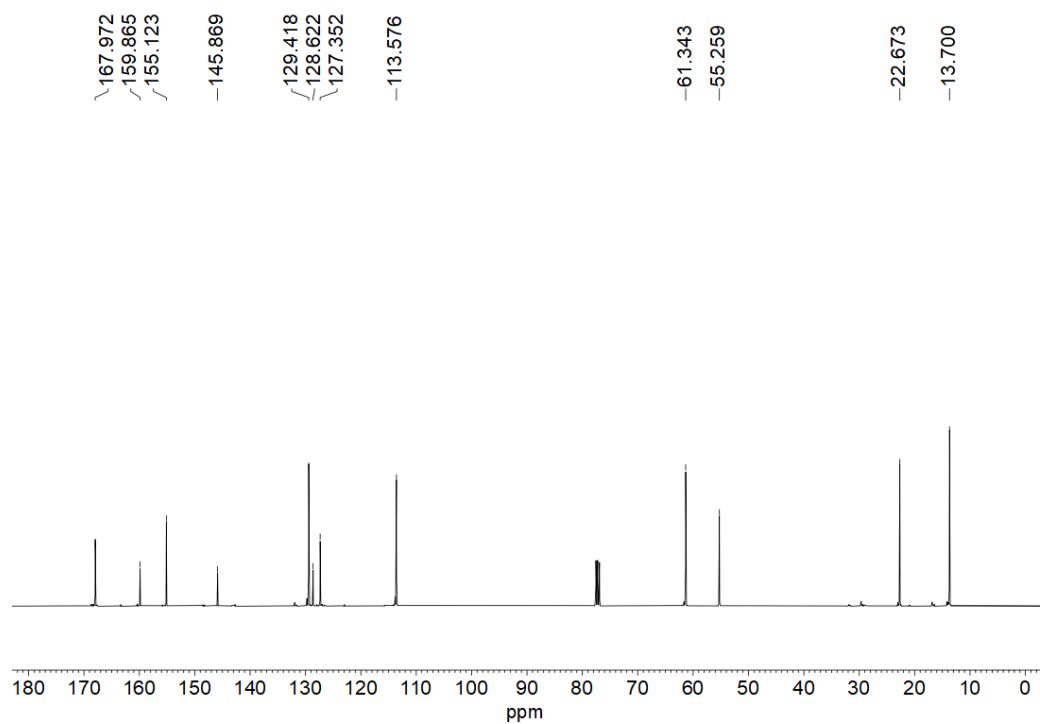

**Figure S66.** The  $^{13}\text{C}$ -NMR spectrum of **7b**.



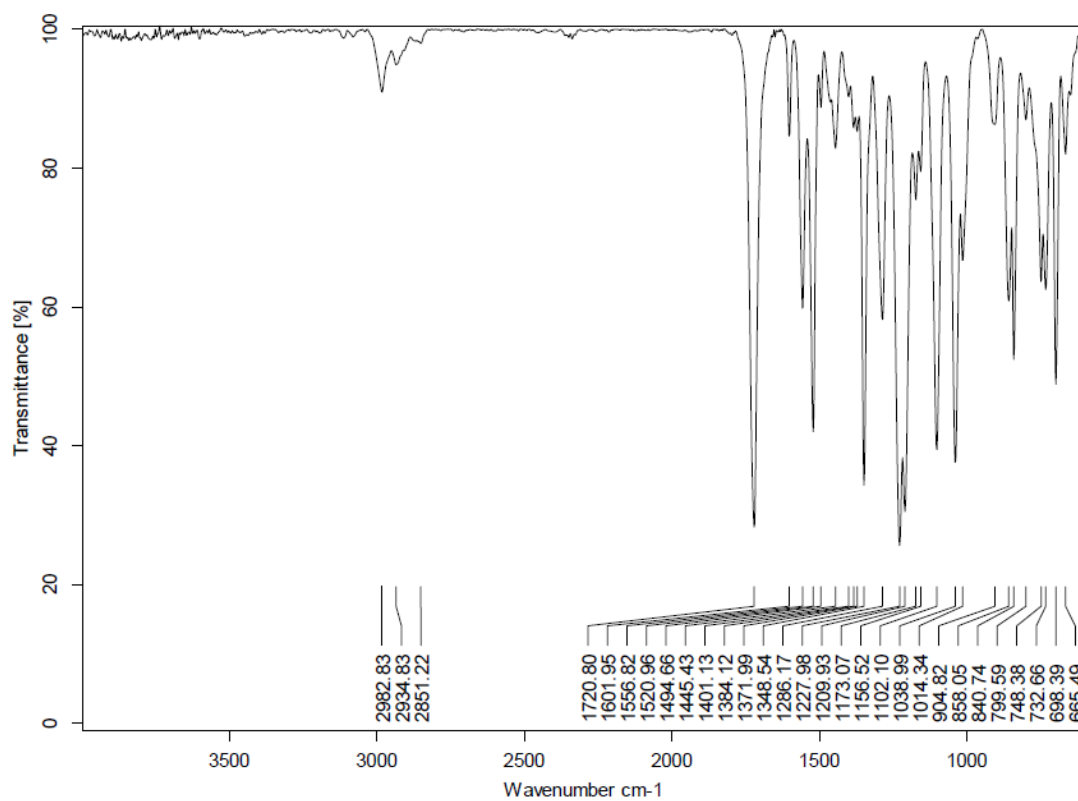

**Figure S67.** The FTIR spectrum of **7c**.

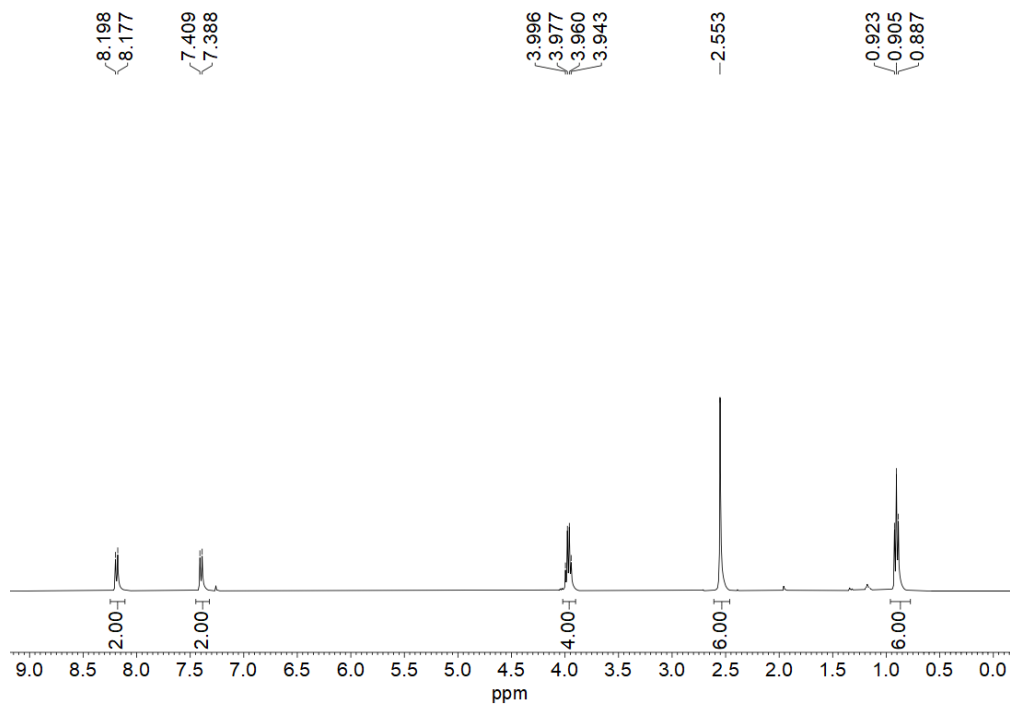

**Figure S68.** The <sup>1</sup>H-NMR spectrum of **7c**.

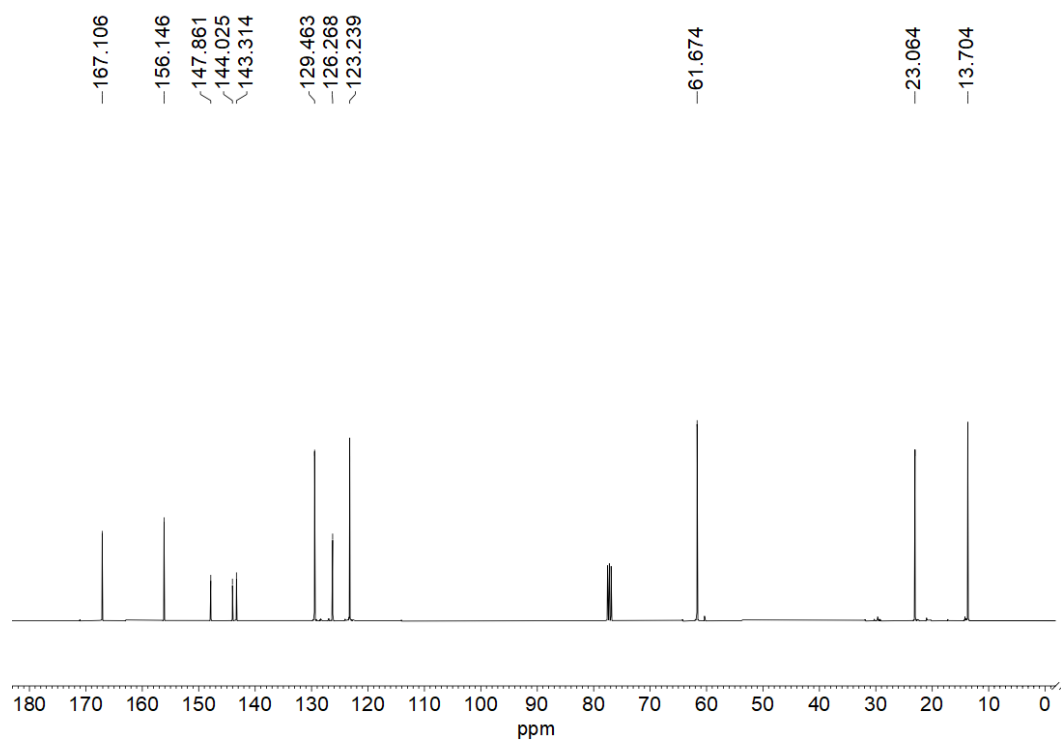

**Figure S69.** The  $^{13}\text{C}$ -NMR spectrum of **7c**.

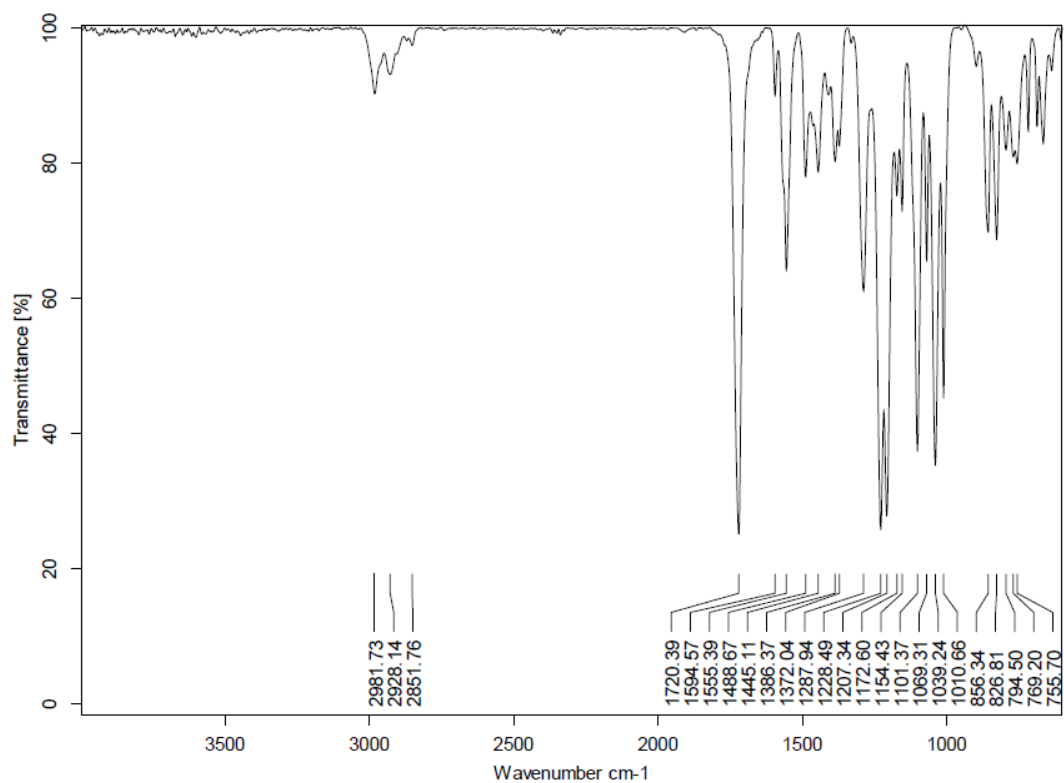

**Figure S70.** The FTIR spectrum of **7d**.

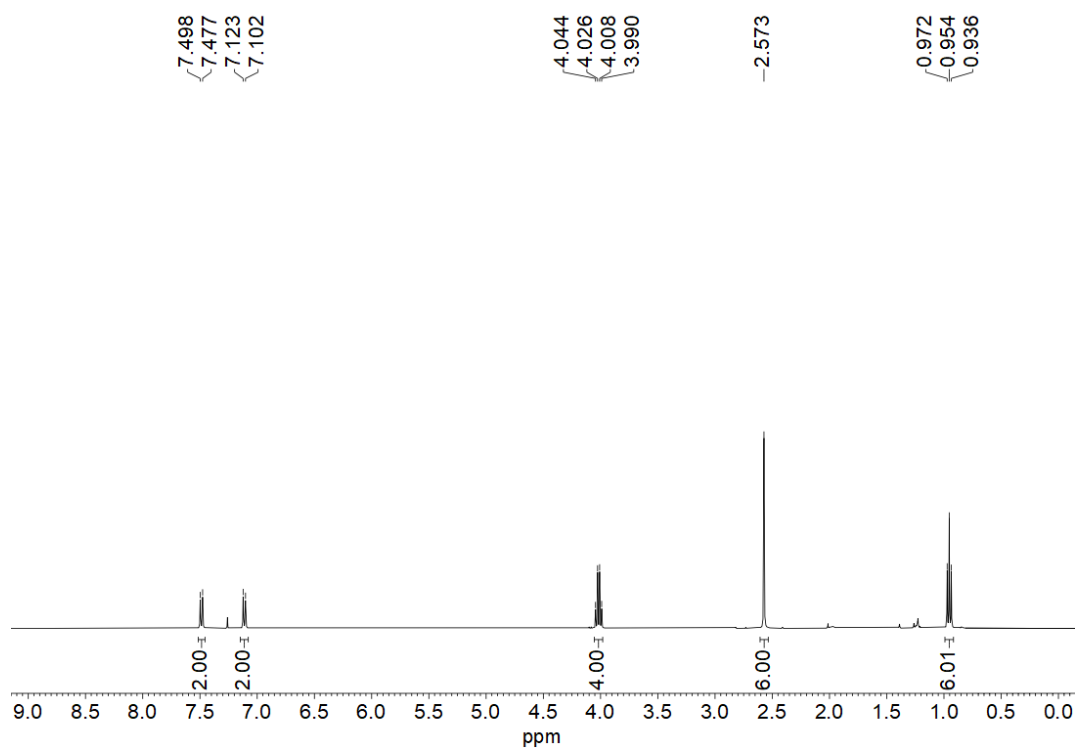

**Figure S71.** The  $^1\text{H}$ -NMR spectrum of **7d**.

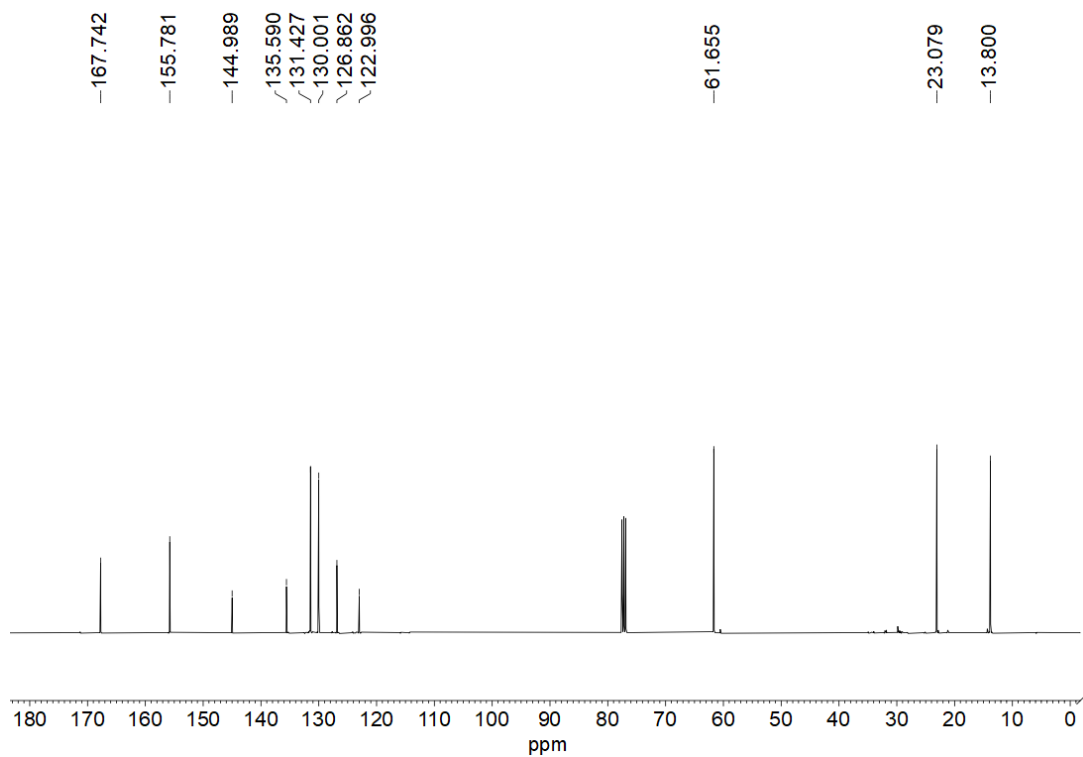

**Figure S72.** The  $^{13}\text{C}$ -NMR spectrum of **7d**.

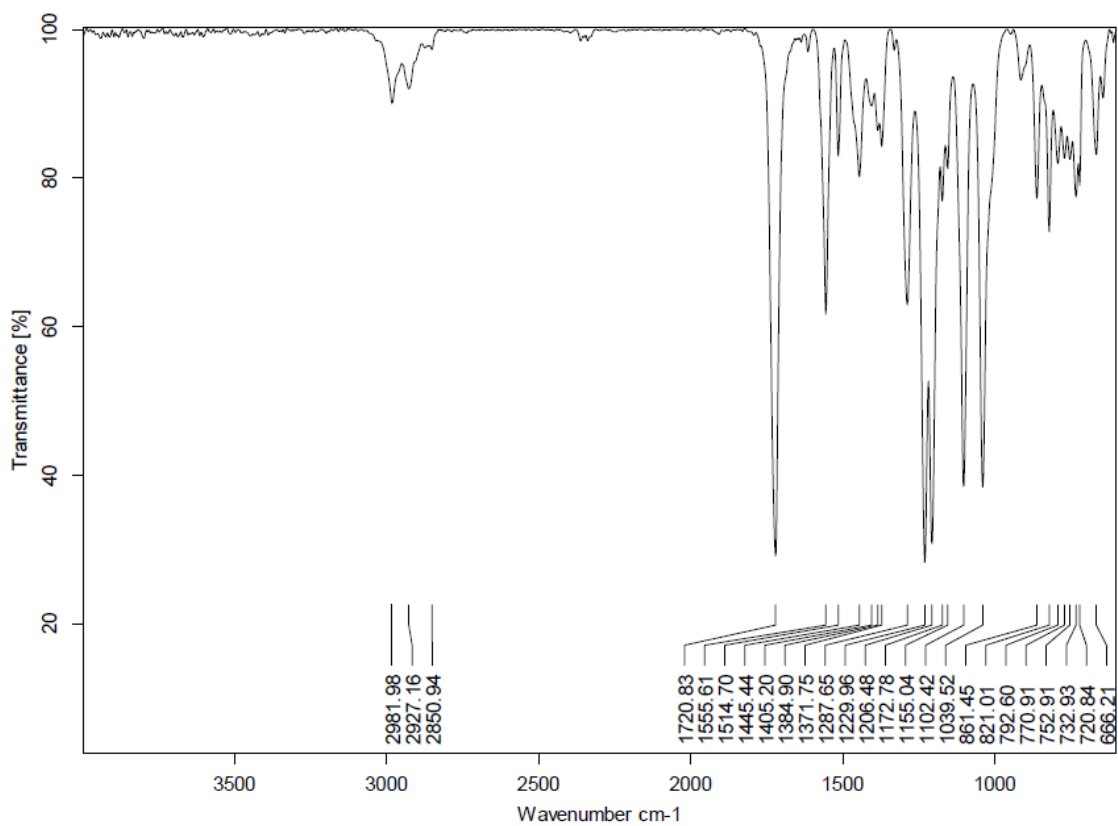

**Figure S73.** The FTIR spectrum of **7e**.

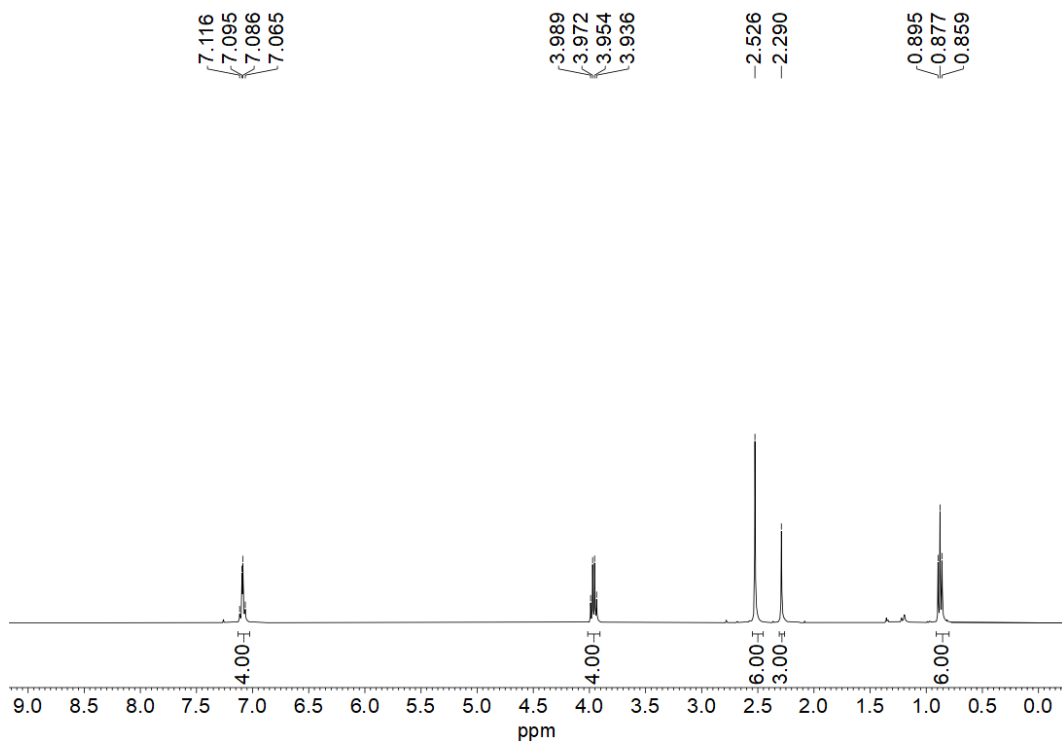

**Figure S74.** The <sup>1</sup>H-NMR spectrum of **7e**.

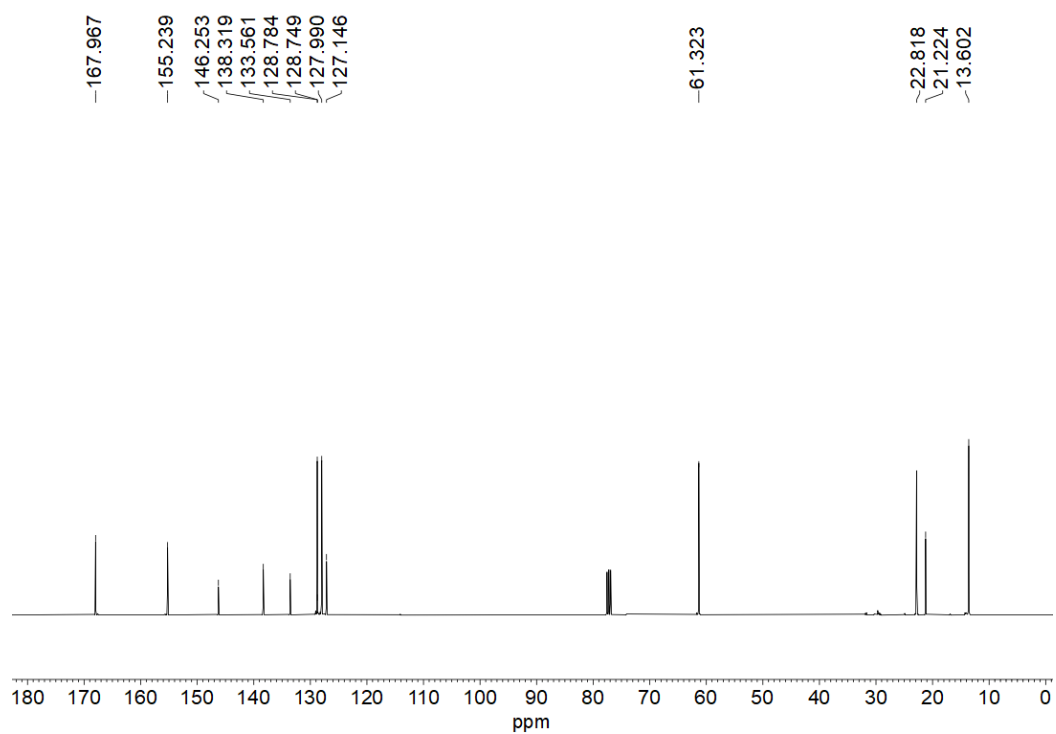

**Figure S75.** The  $^{13}\text{C}$ -NMR spectrum of **7e**.

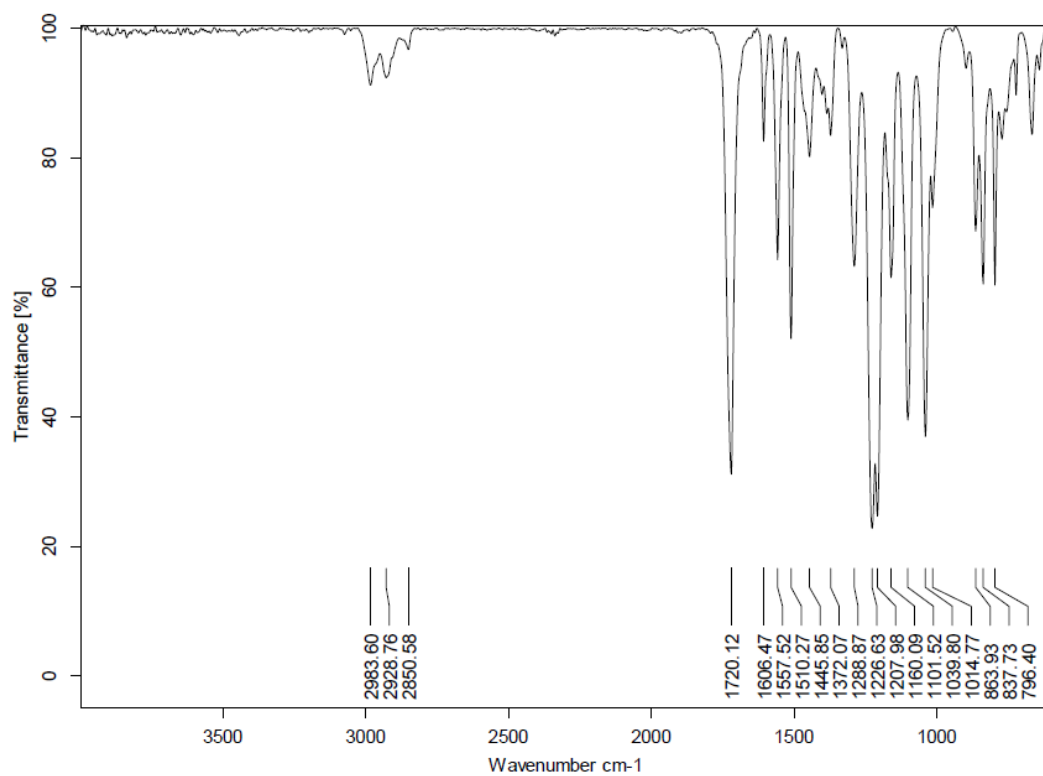

**Figure S76.** The FTIR spectrum of **7f**.

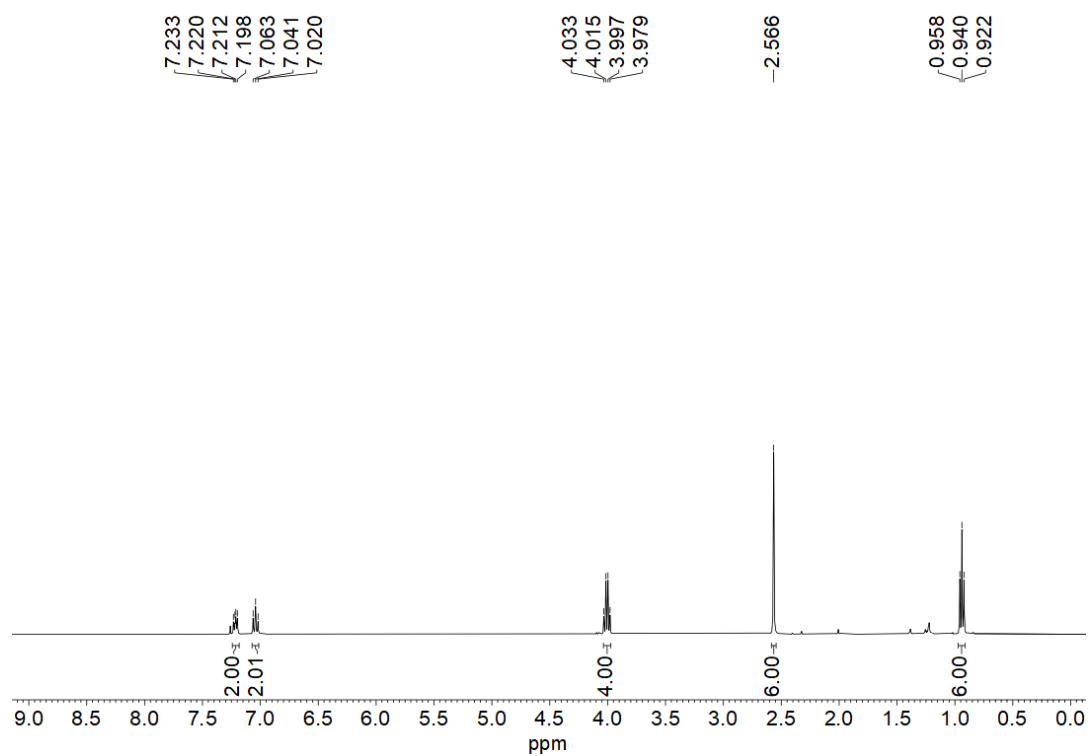

**Figure S77.** The  $^1\text{H}$ -NMR spectrum of **7f**.

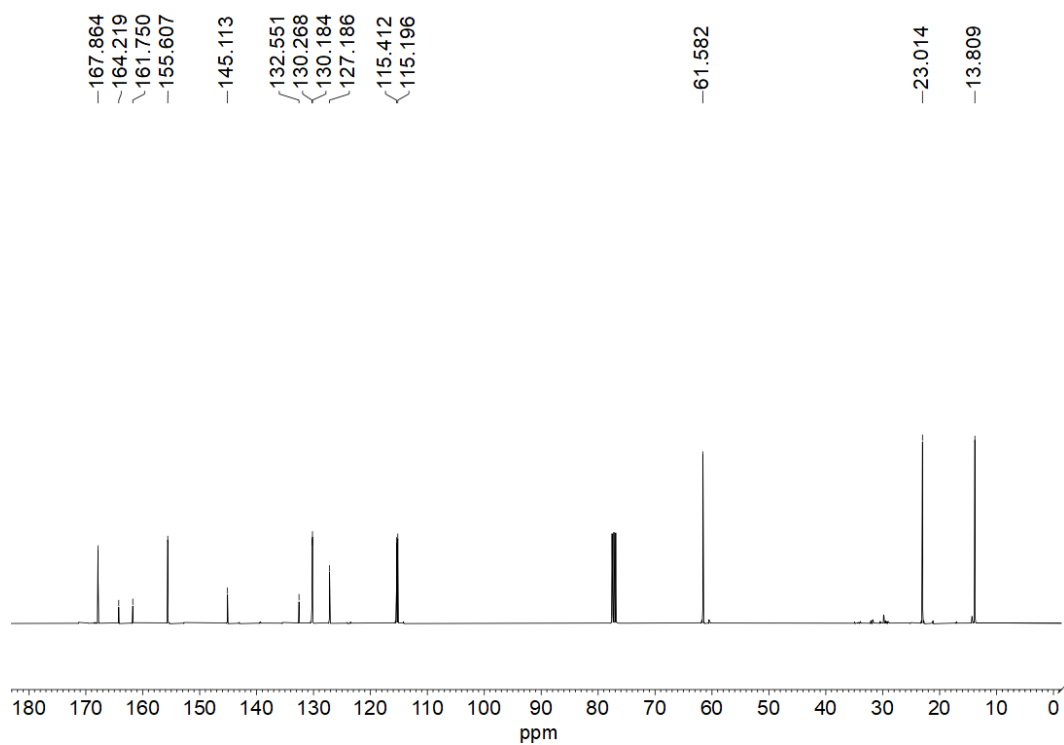

**Figure S78.** The  $^{13}\text{C}$ -NMR spectrum of **7f**.

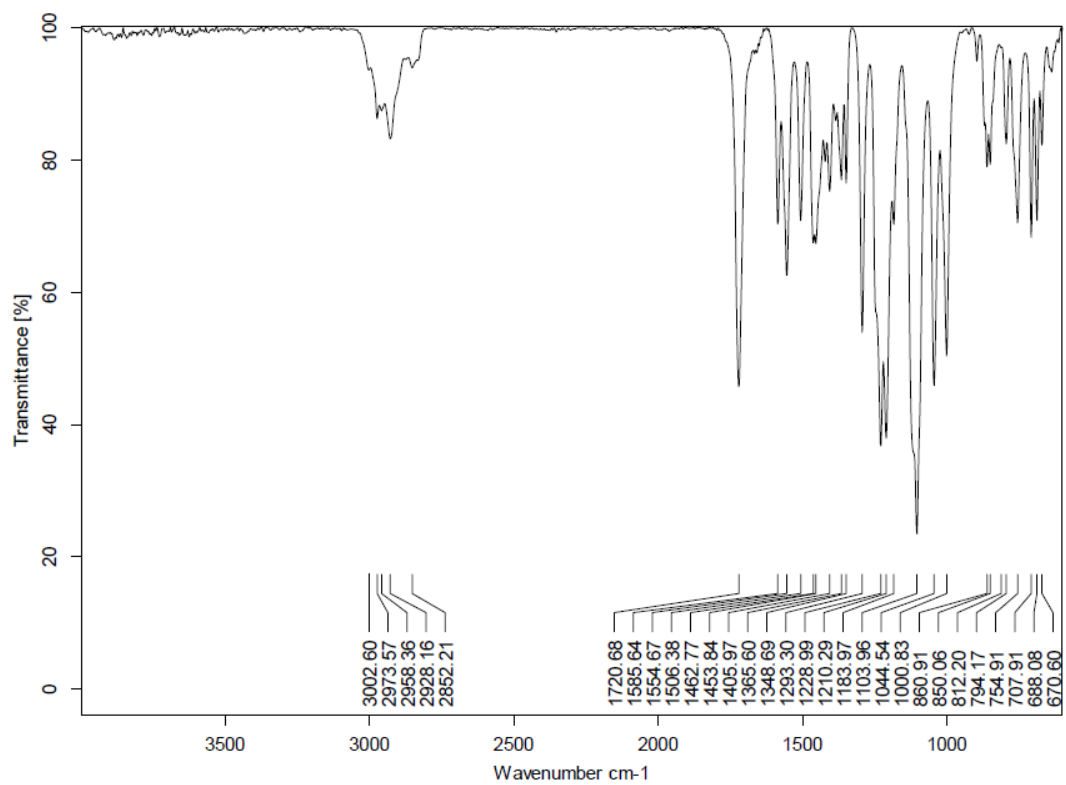

**Figure S79.** The FTIR spectrum of **7g**.

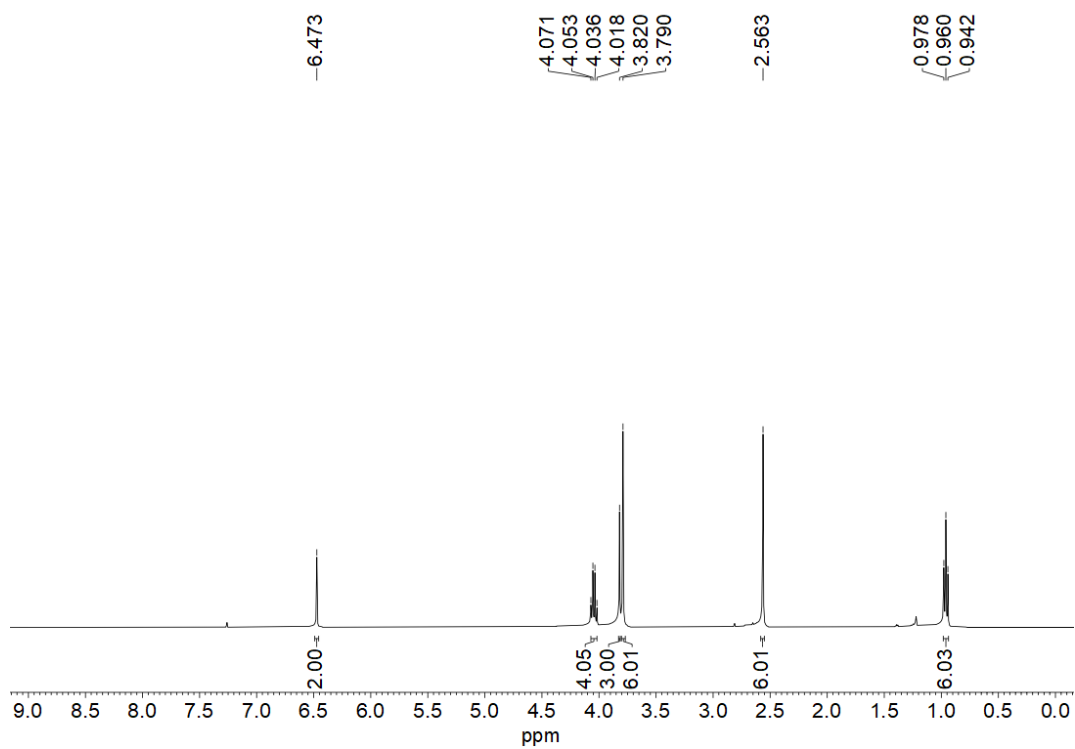

**Figure S80.** The  $^1\text{H}$ -NMR spectrum of **7g**.

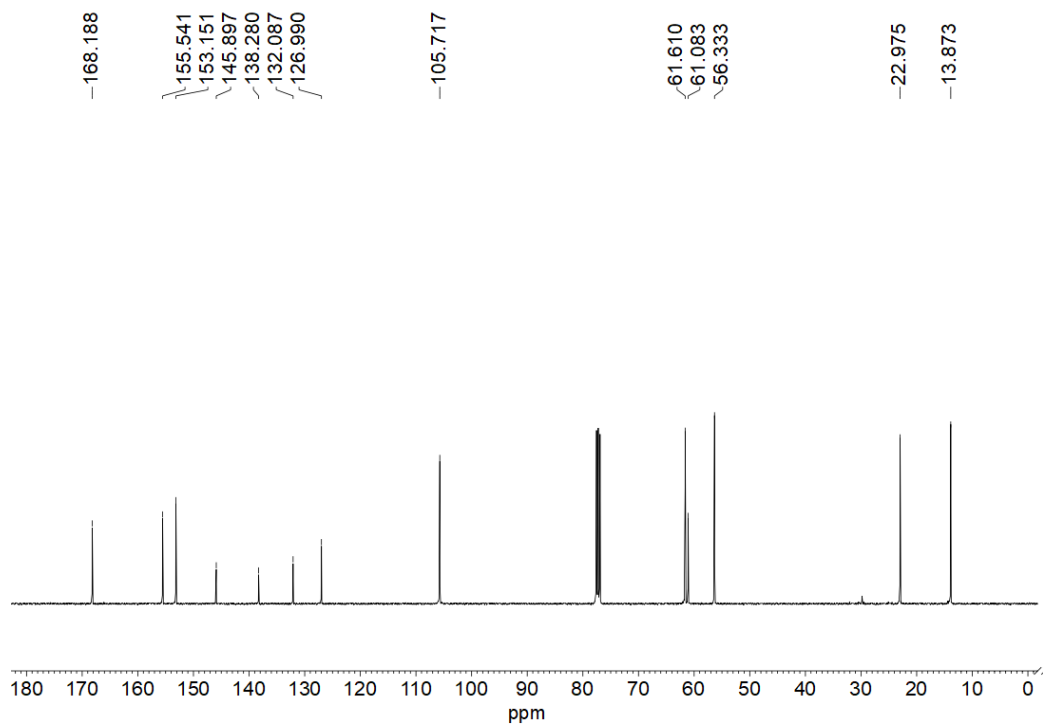

**Figure S81.** The  $^{13}\text{C}$ -NMR spectrum of **7g**.

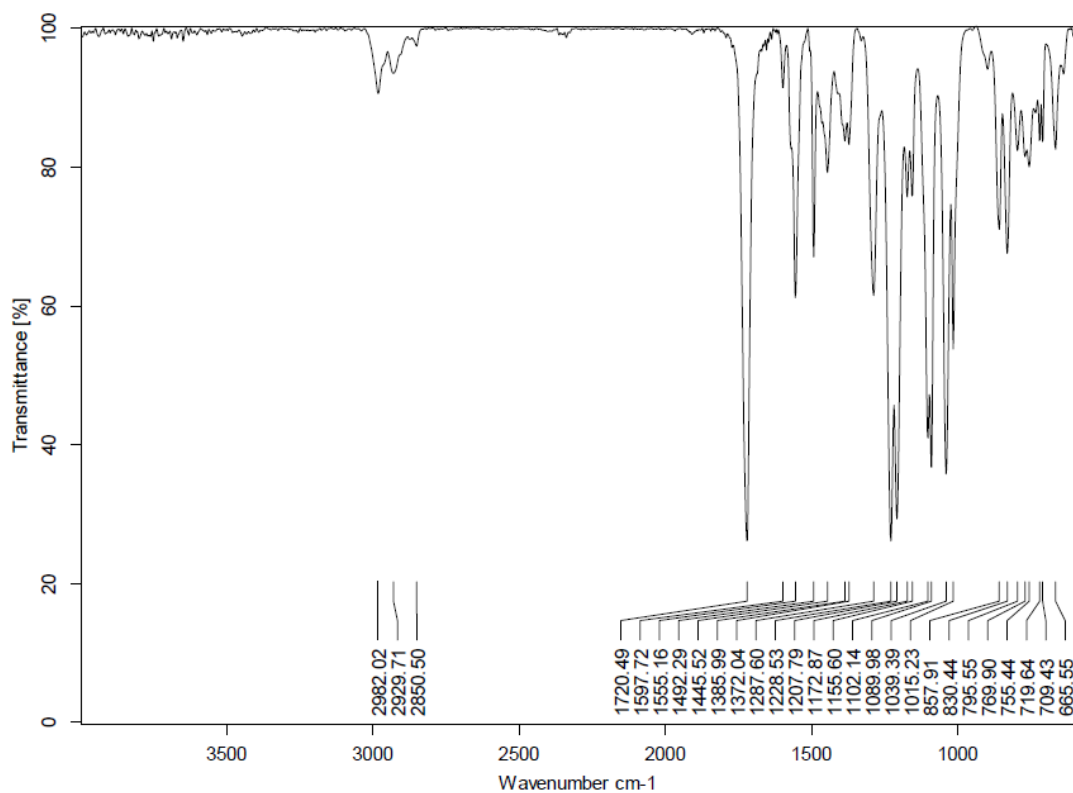

**Figure S82.** The FTIR spectrum of **7h**.



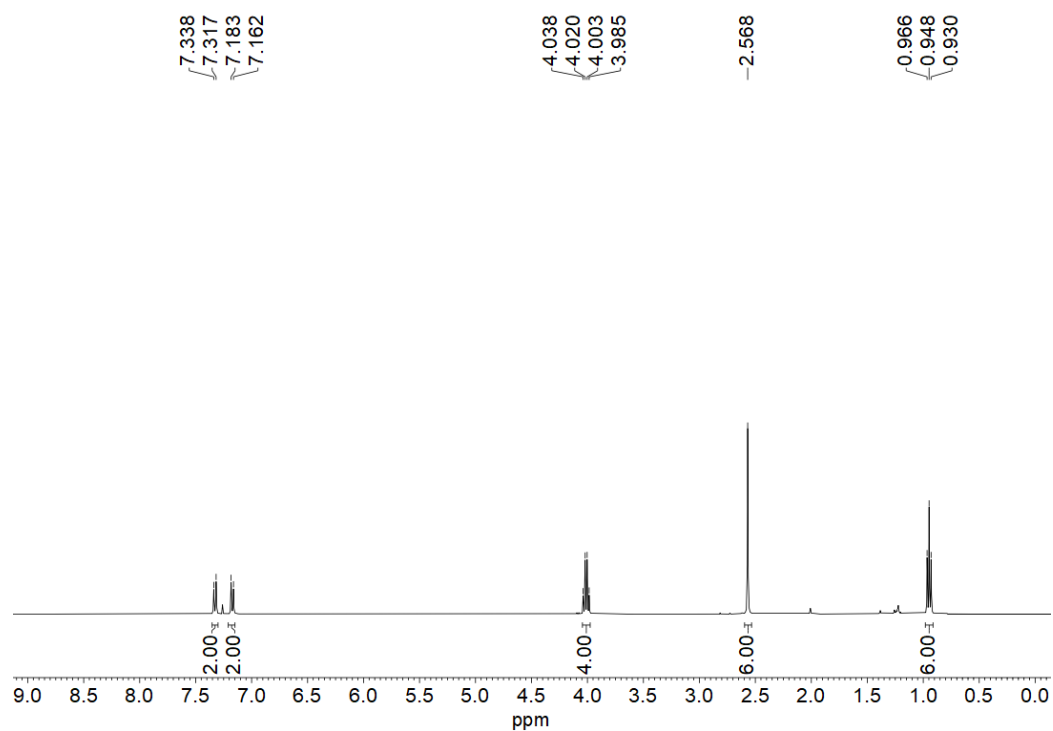

**Figure S83.** The <sup>1</sup>H-NMR spectrum of **7h**.

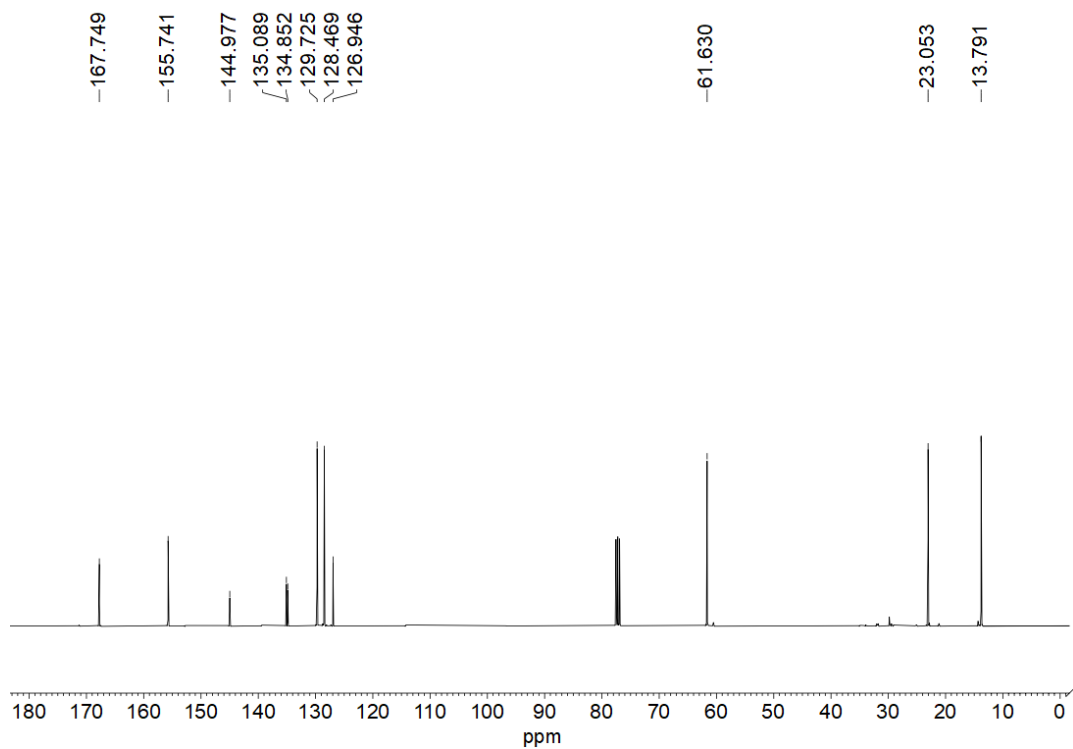

**Figure S84.** The <sup>13</sup>C-NMR spectrum of **7h**.

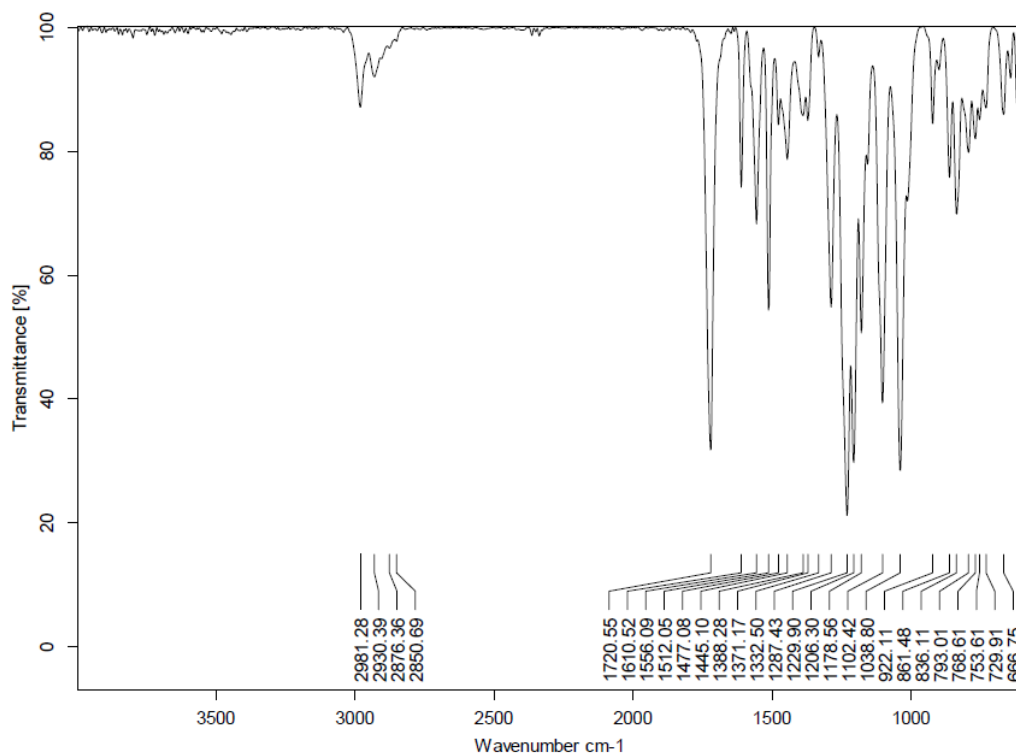

**Figure 85.** The FTIR spectrum of **7i**.

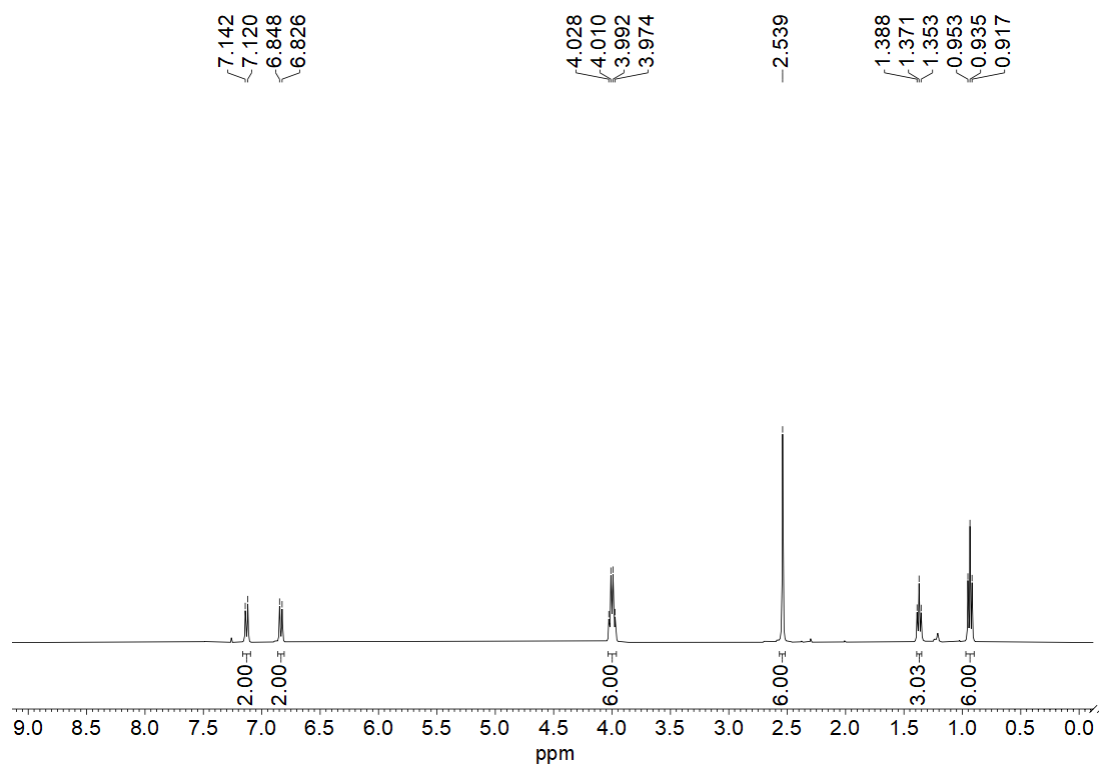

**Figure 86.** The <sup>1</sup>H-NMR spectrum of **7i**.

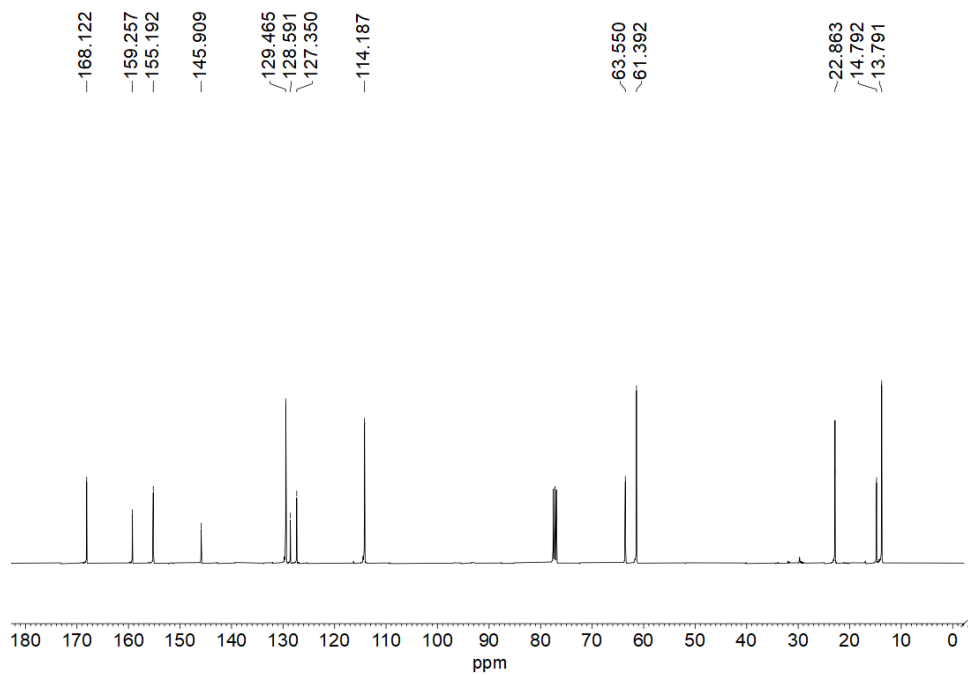

**Figure 87.** The  $^{13}\text{C}$ -NMR spectrum of **7i**.

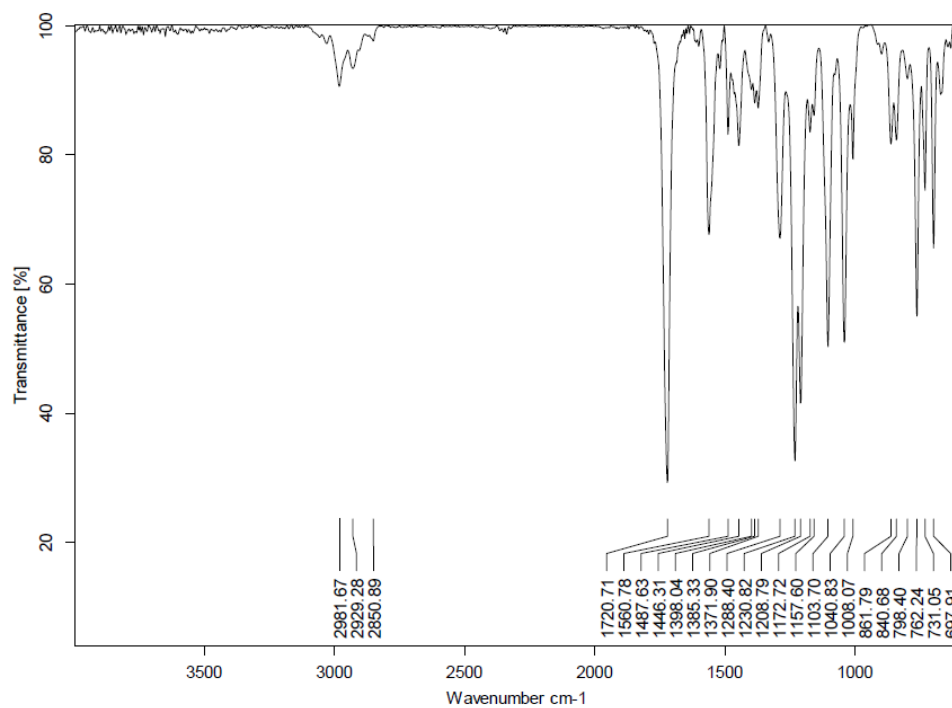

**Figure 88.** The FTIR spectrum of **7j**.

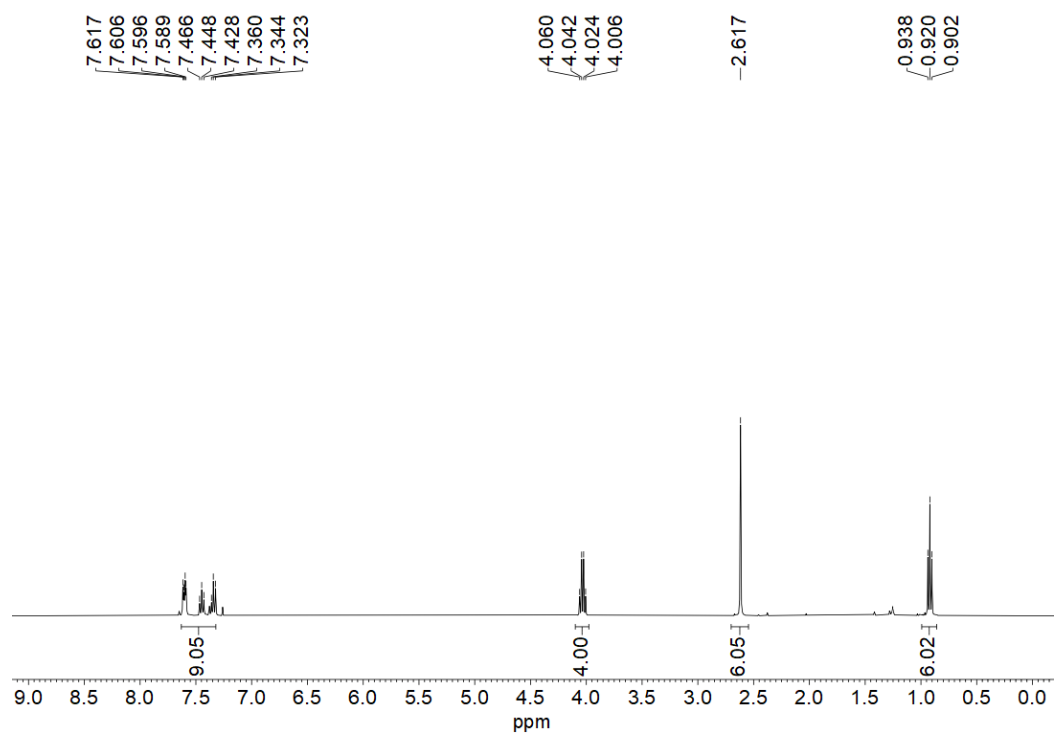

**Figure 89.** The  $^1\text{H}$ -NMR spectrum of **7j**.

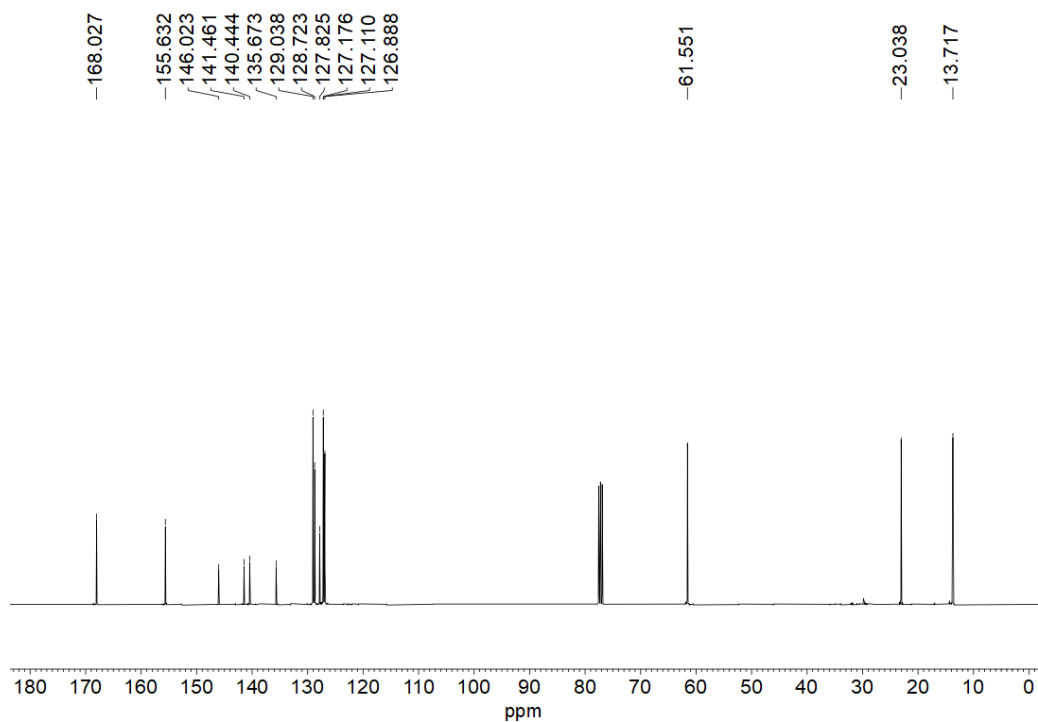

**Figure 90.** The  $^{13}\text{C}$ -NMR spectrum of **7j**.

## References:

- 1 N. Rehman, A. M. Dar, R. F. Ahmad Haji, S. Khan, D. Pareek, S. Farooq and B. A. Dar, *Chem. J. Mold.*, 2024, **19**, 76–83.
- 2 M. Hajjami and E. Ghiasbeygi, *Russ. J. Org. Chem.*, 2016, **52**, 429–432.
- 3 X. Zhang, X. Gu, Y. Gao, S. Nie and H. Lu, *Appl. Organomet. Chem.*, 2017, **31**, e3590.
- 4 N. Devarajan and P. Suresh, *New J. Chem.*, 2019, **43**, 6806–6814.
- 5 K. Valadi, S. Gharibi, R. Taheri-Ledari and A. Maleki, *Solid State Sci.*, 2020, **101**, 106141.
- 6 S. A. Steiger, A. J. Monacelli, C. Li, J. L. Hunting and N. R. Natale, *Acta Crystallogr., Sect. E: Struct. Rep. Online*, 2014, **70**, o791–o792.
- 7 A. Malani, A. Makwana, J. Monapara, I. Ahmad, H. Patel and N. Desai, *J. Biochem. Mol. Toxicol.*, 2021, **35**, e22903.
- 8 D. Khaledian, A. Rostami, S. A. Zarei and B. Mohammadi, *J. Iran. Chem. Soc.*, 2019, **16**, 1871–1878.
- 9 J. Rahimi, M. Niksefat, M. Heidari, M. Naderi, H. Abbasi, M. Tajik Ijdani and A. Maleki, *Sci. Rep.*, 2022, **12**, 13687.
- 10 C. Grison and V. Escande, Compositions of certain manganese accumulating plants, 2020, US11731117B2.

\*\*\*\*\*
